# Supplementary material for: Effectiveness of a hydrogel dressing as an analgesic adjunct to first aid for the treatment of acute paediatric burn injuries: a prospective randomised controlled trial
Source: PubMed Central journal article supplement — BMJ Open. 2021 Jan 5;11(1):e039981. doi: 10.1136/bmjopen-2020-039981 (PMC7786810; doi:10.1136/bmjopen-2020-039981), 2021-01-05
Supplement: bmjopen-2020-039981.draft_revisions.pdf [file bmjopen-2020-039981.draft_revisions.pdf]

# BMJ Open

BMJ Open is committed to open peer review. As part of this commitment we make the peer review history of every article we publish publicly available.

When an article is published we post the peer reviewers' comments and the authors' responses online. We also post the versions of the paper that were used during peer review. These are the versions that the peer review comments apply to.

The versions of the paper that follow are the versions that were submitted during the peer review process. They are not the versions of record or the final published versions. They should not be cited or distributed as the published version of this manuscript.

BMJ Open is an open access journal and the full, final, typeset and author-corrected version of record of the manuscript is available on our site with no access controls, subscription charges or pay-per-view fees (<http://bmjopen.bmj.com>).

If you have any questions on BMJ Open's open peer review process please email [info.bmjopen@bmj.com](mailto:info.bmjopen@bmj.com)

# BMJ Open

## Effectiveness of a hydrogel dressing as an analgesic adjunct to first aid for the treatment of acute paediatric burn injuries: A prospective randomised controlled trial

|                               |                                                                                                                                                                                                                                                                                                                                                                                                                                                                                                                                                                                                                                      |
|-------------------------------|--------------------------------------------------------------------------------------------------------------------------------------------------------------------------------------------------------------------------------------------------------------------------------------------------------------------------------------------------------------------------------------------------------------------------------------------------------------------------------------------------------------------------------------------------------------------------------------------------------------------------------------|
| Journal:                      | <i>BMJ Open</i>                                                                                                                                                                                                                                                                                                                                                                                                                                                                                                                                                                                                                      |
| Manuscript ID                 | bmjopen-2020-039981                                                                                                                                                                                                                                                                                                                                                                                                                                                                                                                                                                                                                  |
| Article Type:                 | Original research                                                                                                                                                                                                                                                                                                                                                                                                                                                                                                                                                                                                                    |
| Date Submitted by the Author: | 01-May-2020                                                                                                                                                                                                                                                                                                                                                                                                                                                                                                                                                                                                                          |
| Complete List of Authors:     | Holbert, Maleea; Queensland Health Centre for Children's Health Research, Centre for Children's Burns and Trauma Research; The University of Queensland Faculty of Medicine<br>Kimble, Roy; Queensland Health Centre for Children's Health Research, Centre for Children's Burns and Trauma Research; The University of Queensland Faculty of Medicine<br>Chatfield, Mark; The University of Queensland Faculty of Medicine<br>Griffin , Bronwyn; Queensland Health Centre for Children's Health Research, Centre for Children's Burns and Trauma Research; Queensland University of Technology Faculty of Health, School of Nursing |
| Keywords:                     | PAEDIATRICS, PAIN MANAGEMENT, ACCIDENT & EMERGENCY MEDICINE, WOUND MANAGEMENT                                                                                                                                                                                                                                                                                                                                                                                                                                                                                                                                                        |
|                               |                                                                                                                                                                                                                                                                                                                                                                                                                                                                                                                                                                                                                                      |

SCHOLARONE™  
Manuscripts

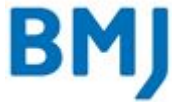

I, the Submitting Author has the right to grant and does grant on behalf of all authors of the Work (as defined in the below author licence), an exclusive licence and/or a non-exclusive licence for contributions from authors who are: i) UK Crown employees; ii) where BMJ has agreed a CC-BY licence shall apply, and/or iii) in accordance with the terms applicable for US Federal Government officers or employees acting as part of their official duties; on a worldwide, perpetual, irrevocable, royalty-free basis to BMJ Publishing Group Ltd ("BMJ") its licensees and where the relevant Journal is co-owned by BMJ to the co-owners of the Journal, to publish the Work in this journal and any other BMJ products and to exploit all rights, as set out in our [licence](#).

The Submitting Author accepts and understands that any supply made under these terms is made by BMJ to the Submitting Author unless you are acting as an employee on behalf of your employer or a postgraduate student of an affiliated institution which is paying any applicable article publishing charge ("APC") for Open Access articles. Where the Submitting Author wishes to make the Work available on an Open Access basis (and intends to pay the relevant APC), the terms of reuse of such Open Access shall be governed by a Creative Commons licence – details of these licences and which [Creative Commons](#) licence will apply to this Work are set out in our licence referred to above.

Other than as permitted in any relevant BMJ Author's Self Archiving Policies, I confirm this Work has not been accepted for publication elsewhere, is not being considered for publication elsewhere and does not duplicate material already published. I confirm all authors consent to publication of this Work and authorise the granting of this licence.

**Title**

Effectiveness of a hydrogel dressing as an analgesic adjunct to first aid for the treatment of acute paediatric burn injuries: A prospective randomised controlled trial

**Authors**

Maleea D. Holbert<sup>1,2,3</sup>, Roy M. Kimble<sup>1,2,3,4</sup>, Mark D. Chatfield<sup>3</sup>, Bronwyn R. Griffin<sup>1,2,4,5</sup>

**Affiliations**

<sup>1</sup> Centre for Children's Burns and Trauma Research, Centre for Children's Health Research, South Brisbane, Queensland, Australia 4101

<sup>2</sup> Pegg Leditschke Paediatric Burns Centre, The Queensland Children's Hospital, South Brisbane, Queensland, Australia 4101

<sup>3</sup> Faculty of Medicine, The University of Queensland, Brisbane, Queensland, Australia 4072

<sup>4</sup> Faculty of Health, School of Nursing, Queensland University of Technology, Brisbane, Queensland, Australia 4059

<sup>5</sup> Institute of Health and Biomedical Innovation, Queensland University of Technology, Brisbane, Queensland, Australia 4059

**Corresponding author:**

Maleea D. Holbert: [m.holbert@uq.edu.au](mailto:m.holbert@uq.edu.au)

Centre for Children's Burns and Trauma Research, Level 7 Centre for Children's Health Research, 62 Graham Street, South Brisbane, QLD 4101, Australia.

Telephone: +61 3069 7433

**Co-authors' email addresses**

Roy Kimble: [royk@uq.edu.au](mailto:royk@uq.edu.au)

Mark Chatfield: [m.chatfield@uq.edu.au](mailto:m.chatfield@uq.edu.au)

Bronwyn Griffin: [b.griffin@uq.edu.au](mailto:b.griffin@uq.edu.au)

## Abstract

### *Objective*

To compare the effectiveness of two acute burn dressings, Burnaid® hydrogel dressing and plasticised polyvinylchloride film, on reducing acute pain scores in paediatric burn patients following appropriate first aid.

### *Design*

Single-centre, superiority, two-arm, parallel-group, prospective randomised controlled trial.

### *Participants and Setting*

Paediatric patients (aged  $\leq 16$ ) presenting to the Emergency Department at the Queensland Children's Hospital, Brisbane, Australia, with an acute thermal burn were approached for participation in the trial from September 2017 – September 2018.

### *Interventions*

Patients were randomised to receive either (1) Burnaid® hydrogel dressing (Intervention) or (2) plasticised polyvinylchloride film (Control) as an acute burn dressing.

### *Primary and Secondary Outcomes*

Observational pain scores from nursing staff assessed 5-minutes post-application of the randomised dressing, measured using the Faces Legs Activity Cry and Consolability Scale was the primary outcome. Repeated measures of pain, stress, and re-epithelialisation were also collected at follow-up dressing changes until 95% wound re-epithelialisation occurred.

### *Results*

Seventy-two children were recruited and randomised ( $n = 37$  Intervention;  $n = 35$  Control). No significant between-group differences in nursing (Mean Difference: -0.1, 95% CI: -0.7 to 0.5,  $p = 0.72$ ) or caregiver (MD: 1, 95% CI: -8 to 11,  $p = 0.78$ ) observational pain scores were identified. Moreover, no significant differences in child self-report pain (MD: 0.3, 95% CI: -1.7 to 2.2,  $p = 0.78$ ), heart rate (MD: -3, 95% CI: -11 to 5,  $p = 0.41$ ), temperature, (MD: 0.6, 95% CI: -0.13 to 0.24,  $p = 0.53$ ), stress (Geometric Mean Ratio: 1.53, 95% CI: 0.93 to 2.53,  $p = 0.10$ ), or re-epithelialisation rates (MD: -1, 95% CI: -3 to 1,  $p = 0.26$ ) were identified between the two groups.

## Conclusions

A clear benefit of Burnaid® hydrogel dressing as an analgesic adjunct to first aid for the treatment of acute paediatric burns was not identified in this investigation.

## Trial Registration

Australia and New Zealand Clinical Trials Register (ACTRN): ACTRN12617001274369

## Article Summary

### *Strengths and limitations of this study*

- First randomised controlled trial investigating analgesic properties of acute burn dressings in a paediatric burn population
- Pain was assessed using age-specific and reliable self-report and observational scales, in addition to physiological measures of pain and distress.
- This investigation was pragmatic in nature, replicating real-world clinical scenarios where the interventions are used
- Levels of adverse pain in trial participants were lower than expected
- A large proportion of participants reported no-to-low pain at the time of their initial presentation, therefore pain scores might have been too low to observe treatment-related effects.

### *Key Words*

Burns, Paediatric Emergency Medicine, Randomised Controlled Trial, Pain

## 1. Introduction

Pain remains a major issue following a burn, and research suggests that pain from burn injuries continues to be undertreated in children [1]. The subsequent wound care required to treat a burn is also associated with significant pain and distress – thus burn pain comprises a challenging spectrum of acute, background, breakthrough, and procedural pain [2, 3]. The aim of this trial was to provide health practitioners with evidence to support the use of an acute burn dressing that is superior in terms of pain relief for paediatric patients with acute thermal burn injuries. Optimising pain management for paediatric burn patients is more than just a compassionate need to reduce suffering – despite that being a sufficient motivator for health care professionals. Improving acute pain control for children with traumatic injuries such as a burn is critical, as suboptimal analgesia can prolong wound re-epithelialisation [4, 5], have long-term emotional consequences [6, 7] and influence pain perception and processing later in life [8, 9].

Topical administration of cool running water (CRW) for 20 minutes within 3 hours of the burn occurring is the recommended gold standard first aid for burn injuries, in accordance with the Australian and New Zealand Burn Association [10-14]. Following first aid, guidelines recommend burn wounds to be covered with a sterile dressing to maintain a moist wound environment, minimise the risk of infection, and prevent air exposure – as this can be quite painful for patients with acute burns [15]. Characteristics of an ideal acute burn dressing include a transparent non-adherent design, easy application and removal, and protection from environmental exposure. Plasticised polyvinylchloride (PVC) film fulfils this criteria, and excluding the application to facial burns, is an inexpensive and practical dressing for acute burn injuries in the pre-hospital and Emergency Department (ED) setting. For this reason, PVC film has been used in the management of acute burns for over four decades. However, the preferred acute burn dressing varies between pre-hospital services in different states and countries.

Over the past decade, Burnaid® hydrogel dressings have gained widespread use in the pre-hospital setting for acute burn injuries – and are promoted as providing hydration to the burn wound and pain relief via a convection and evaporative cooling effect [16]. Burnaid® dressings comprise of a 3mm thick sterile polyester urethane foam pad impregnated with a propylene glycol gel, which contains more than 90% purified water. Despite its popularity amongst pre-hospital services, there is limited empirical evidence for the effectiveness of hydrogel burn dressings, and no studies have been conducted in a paediatric burn population. At present,

1  
2 there is no robust empirical evidence to support the adoption of one particular acute burn dressing over the  
3 others. With the continual development of expensive wound care products, it is important that we validate  
4 their use and effectiveness within the targeted clinical population. This trial examined the effectiveness of  
5  
6 Burnaid® hydrogel dressings as an analgesic adjunct to first aid for the treatment of acute paediatric burns in  
7  
8 comparison to current standard practice – PVC film.  
9  
10  
11  
12

## 13 **2. Methods**

### 14 *2.1 Design and setting*

15  
16 We conducted a prospective, single-centre, superiority, randomised controlled trial (RCT) examining the  
17 effectiveness of a hydrogel dressing as an analgesic adjunct to first aid for the treatment of acute paediatric  
18 burn injuries, compared to current standard care. We used a two-arm parallel design with a 1:1 allocation  
19 ratio. Participants were recruited between September 2017 – September 2018 from the ED and the Pegg  
20 Leditschke Children’s Burns Outpatient Department (OPD) at the Queensland Children’s Hospital (QCH)  
21 following initial presentation for their burn. The QCH serves as the major burns referral centre for  
22 Queensland and Northern New South Wales, treating over 1200 paediatric patients with burn injuries per  
23 annum.  
24  
25  
26  
27  
28  
29  
30  
31  
32  
33

### 34 *2.2 Patient and public involvement*

35  
36 Patients and/or the public were not involved in the development of this research. However, relevant  
37 stakeholders and knowledge users (i.e. pre-hospital staff, clinicians, and nurses) were involved in  
38 the initial development of the trial, refinement of research questions, and identification of current  
39 knowledge gaps.  
40  
41  
42  
43  
44  
45  
46  
47

### 48 *2.3 Protocol and registration*

49  
50 This trial received ethics approval from The Queensland Children’s Health Service Human Research Ethics  
51 Committee (approval number: HREC/16/QRCH/322) and The University of Queensland Ethics Committee  
52 (clearance number: 2017000979). Study methodology was documented in a published protocol [17] and  
53 registered with the Australian New Zealand Clinical Trials Registry (ID number: ACTRN12617001274369)  
54 on the 5<sup>th</sup> September 2017 prior to recruitment. This trial was completed as per the published protocol [17],  
55 which contains a more in-depth description of the trial’s design and methods.  
56  
57  
58  
59  
60



## 2.4 Participants

### 2.4.1 Inclusion criteria

Inclusion criteria: children aged between 0 – 16 years with an acute thermal burn < 20% of the child's total body surface area (TBSA), presented to the ED or Burns OPD within 24 hours of sustaining the burn, received optimal first aid, and no silver dressings or silver sulphadiazine cream applied prior to enrolment.

### 2.4.2 Exclusion criteria

Exclusion criteria included: children with non-thermal burns or inhalation injuries, presented to the QCH more than 24-hours post-burn, inadequate first aid, prior treatment with silver wound products, non-English speaking, cognitive impairments, required ventilation or initial debridement under general anaesthetic, current involvement with Department of Communities, known sensitivity to hydrogels, and patients with comorbidities that could impair wound healing or exacerbate/alter pain (i.e. metabolic congenital disorders, spinal cord defects/injuries, insensate patients).

**[INSERT Figure 1. CONSORT Flow Diagram]**

## 2.5 Procedures

All participants (if age appropriate) and caregivers were given verbal and written information about the research, and provided signed consent to participate in the trial. After obtaining informed consent, participants were stratified by pain risk (1. High Pain or 2. Low Pain) according to factors that could influence pain in paediatric burn patients. Factors were based on findings from a retrospective review of data from the Queensland Paediatric Burns Registry (unpublished hospital quality review). Participants presenting to the ED or Burns OPD with one or more of the following criteria were considered at high pain risk: unilateral or bilateral foot burns, campfire/hot coal burns, circumferential burn injuries, and burns >5% TBSA. Following stratification, patients were randomised to receive either (1) Burnaid® hydrogel dressing (Intervention) or (2) PVC film (Control). A computerised random number sequence-generating program was used for participant randomisation. Concealment of treatment allocation were performed via the use of sealed, opaque, identical, consecutively numbered envelopes prepared in advance by an independent third-party.

1  
2 Due to the pragmatic nature of this trial, researchers could not be blinded to which randomised dressing  
3 patients received. Researchers were required to be present when the acute burn dressings were applied and  
4 removed to obtain pain scores and additional outcome measures from the child, caregiver, and medical staff.  
5  
6 Treating clinicians, nursing staff, patients, and caregivers were also not blinded to which treatment  
7 participants received as dressings were visible on the patient's burn. Because these dressings are topical,  
8 concealment during patient treatment in the ED was not possible. To include an element of blinding in the  
9 trial, a specialist panel of burn surgeons and senior nurses performed a blinded review of 3D wound images  
10 to determine rate of re-epithelialisation at each dressing change until > 95% burn re-epithelialisation  
11 occurred.  
12  
13  
14  
15  
16  
17  
18  
19

20  
21 **[INSERT Figure 2. Pain assessment timepoints during acute and follow up care]**  
22

23  
24 Pain was assessed in the ED (*Figure 2A*) at five timepoints relative to the child's acute treatment for their  
25 burn: (T1) Pre-randomised dressing application, (T2) Post-randomised dressing application, (T3) Peak pain  
26 during wound cleaning and debridement capturing the worst/maximal pain experienced during acute  
27 treatment, (T4) Pre-silver dressing application, and (T5) Post-silver dressing application (see *Figure 2A*).  
28 During subsequent dressing changes in the Burns OPD (*Figure 2B*), pain was assessed at five time points  
29 relative to the child's follow up treatment: (T1) Pre silver-dressing removal, (T2) Post-dressing removal,  
30 (T3) Peak pain during wound cleaning, (T4) Pre-silver dressing application, and (T5) Post-silver dressing  
31 application (see *Figure 2B* above). Observational pain scores from ED nursing staff assessed post-  
32 application of the randomised dressings (T2 in *Figure 2A*) was the primary outcome measure of the trial.  
33 Pain at T2 was assessed five minutes after the application of the randomised dressings for all participants –  
34 to give the dressings a standard period of time on the wound before pain assessment.  
35  
36  
37  
38  
39  
40  
41  
42  
43  
44  
45  
46  
47

48 Additional measures collected at each of the ten aforementioned timepoints during the child's acute and  
49 follow up care included: a saliva sample (to measure biomarkers of stress), heart rate, and temperature. The  
50 duration of each burn care procedure was timed in the ED and Burns OPD. Information regarding analgesic  
51 medication administered to the patient prior to enrolment in the trial was obtained from Ambulance chart  
52 records and referral notes. All medication administered to patients following presentation to the QCH was  
53 recorded, in addition to all non-pharmacological interventions such as distraction techniques, rewards,  
54 procedural preparation, and music/behavioural therapies.  
55  
56  
57  
58  
59  
60

## 2.6 Interventions

### 2.6.1 Intervention – Burnaid® hydrogel dressing

Burnaid® hydrogel dressing (Mundicare®, Sydney, Australia) served as the treatment intervention in this trial. Burnaid® products previously contained *Melaleuca Alternifolia* (tea tree) for its broad-spectrum antimicrobial properties, however inclusion of this active ingredient has since ceased and no tea tree containing Burnaid® products were used in this investigation.

### 2.6.2 Control – Plasticised polyvinylchloride film

Plasticised PVC film (also known as plastic wrap, cling film, and Saran™ wrap) is a thin (< 25µm) food-wrap that has been used in the management of acute burn injuries for over four decades [18, 19].

## 2.7 Measurements

### 2.7.1 Primary outcome measure

Observational pain scores from ED nursing staff was the primary outcome measure of the trial, and was assessed using the Face, Legs, Activity, Cry and Consolability (FLACC) scale. The FLACC scale is a five-item composite tool measuring aspects of both pain and distress in children. The scale consists of five categories of behaviour, each of which are scored on a 0 to 2-point scale, giving a total score ranging from 0 to 10.

### 2.7.2 Additional Measures of Pain

#### 2.7.2.1 Child self-report (ages 4 – 8 years)

Child self-report pain scores were assessed using the Faces Pain Scale – Revised (FPS – R). The FPS – R is a linear self-report scale designed for pain assessment in children over the age of four [20, 21]. The item is composed of six-points (six-faces with differing expressions) with a lower anchor of *no pain* and an upper anchor of *very much pain*.

#### 2.7.2.2 Child self-report (ages 8+)

For patients over the age of eight, self-report pain was assessed using the Visual Analogue Scale for Pain (VAS). The VAS has been described in the literature as a reliable and well-validated pain assessment tool for use in older children [22, 23].

### 2.7.2.3 Parent (observational) report

Parent/caregiver observational pain scores were assessed using the Observer Visual Analogue Scale for Pain (VAS Observer) for pre-verbal paediatric patients and those under the age of four. The VAS Observer has been shown to be a reliable and valid observational pain scale for use in a non-verbal paediatric population, and for children who are unable to self-report their pain [24].

### 2.7.3 Secondary outcome measures

#### 2.7.3.1 Re-epithelialisation

Burns were considered re-epithelialised if  $\geq 95\%$  of the original wound area had re-epithelialised, and the patient no longer required silver dressings. Wound re-epithelialisation was assessed using two methods. First, clinical judgement from the treating surgical consultant was determined at each dressing change. Second, a panel of paediatric burn specialists performed a blinded review of 3D images (3D LifeViz™ System; QuantifiCare, Valbonne, France) of patient's burn wounds taken at each dressing change.

#### 2.7.3.2 Stress

Stress was assessed in this trial using  $\alpha$ -amylase – a biochemical stress marker produced locally within salivary glands. Patients placed a SalivaBio Oral Swab™ (Salimetrics Europe Ltd., Newmarket, UK) under their tongue for 2 minutes for saliva collection. Salivary Alpha-Amylase Kinetic Enzyme Assay Kits (Item No. 1-1902, Salimetrics Inc) were used to quantify  $\alpha$ -amylase, as per the manufacturer's instructions. The trial protocol included assessments of levels of  $\alpha$ -amylase and cortisol as indicators of stress during burn wound treatment in the ED and subsequent dressing changes. Salivary  $\alpha$ -amylase (sAA) was selected over cortisol based on previous research conducted at the Pegg Leditschke Paediatric Burns OPD [25]. This research found sAA to be responsive to stress during wound care procedures, and also found an association between sAA and pain in children with thermal burns during dressing changes. Moreover, follow up appointments occur during a morning clinic which runs from 7.30am – 10am. Cortisol levels are known to peak within 30 – 45 minutes of waking up and then decrease due to diurnal variation. Due to the timing of sample collection, sAA was deemed to be a more appropriate measure of stress in this trial. Saliva samples were analysed from the following timepoints:

1. Pre- and post-application of the randomised dressing (i.e. Burnaid® or PVC film)

2. Following patient arrival in the Burns OPD for their first dressing change – prior to premedication and silver dressing removal
3. Following patient arrival in the Burns OPD for their second dressing change – prior to premedication and silver dressing removal

### 2.7.3.3 Demographic and clinical information

Demographic and clinical details were obtained from parents/caregivers and medical records including age, sex, burn mechanism, area affected, estimated burn TBSA, and pre-hospital care (such as first aid and pharmacological interventions). Treating surgical staff first assessed burn TBSA in the ED following wound debridement using a modified version of the Lund and Browder chart [26]. Burn TBSA was also assessed at each change of dressing from the child's treating consultant until the burns were considered to be 95% re-epithelialised. Burn depth was assessed using two methods in the trial. First, clinical judgment from the treating surgical consultant was reported following initial patient presentation to the hospital, and at each follow up appointment in the Burns OPD for dressing changes. Second, burn depth was assessed using rapid imaging with Moor LDLS-BI™ Laser Doppler Imager (Moor Instruments Limited, Devon, United Kingdom). Laser Doppler Imaging (LDI) is a non-contact technique used in the assessment of burn injuries to measure skin blood perfusion at the surface of the burn wound [27]. LDI measures the extent of micro-vessel blood flow within the whole burn area, providing information on burn depth via microcirculation expressed as “perfusion units” (PU) [28, 29]. Participants had their burn wounds scanned using LDI on their first change of dressing (72 – 120 hours post-burn) in the Burns Outpatient Department to obtain mean and minimum PU. This time period for LDI is in accordance with the manufactures instructions, and has been established as acceptable time frame in recent studies [30, 31].

### 2.8 Statistical Analysis

In accordance with previous studies aiming to reduce pain in paediatric burn patients, we expected pain scores within each treatment group to have a normal distribution and a standard deviation (SD) of 2.7 [32]. Data were analysed on an intent-to-treat basis. Sample size was estimated at 29 experimental (intervention) participants and 29 control participants to detect a significant between-group difference of 1.8 in pain scores post-dressing application. With power equal to 0.8,  $\alpha$  set at 0.05, and up to a potential 20% loss to follow-up, the calculated target sample size was 72 participants. Between-group differences in primary and secondary

1  
2 outcomes were estimated using mixed models in Stata version 16 [33]. Random effects for patients  
3  
4 accounted for the repeated measures, and restricted maximum likelihood method with Kenward-Rogers  
5  
6 degrees of freedom was used. Each model included data at baseline (i.e. pre-dressing) and at one follow-up  
7  
8 time, and assumed no population differences at baseline, a change from baseline in the control group and a  
9  
10 different change from baseline in the intervention group. Adjusted mean differences (Intervention - Control)  
11  
12 and 95% confidence intervals (CIs) are reported. The sAA data was log-transformed, and the adjusted ratio  
13  
14 of geometric means (Intervention  $\div$  Control) are reported [34].  
15  
16

### 17 **3. Results**

#### 18 *3.1 Sample and demographic characteristics*

19  
20 Seventy-two paediatric burn patients were randomised and recruited into the trial. Four participants were lost  
21  
22 to follow up and had no additional data collected past the initial point of treatment in the ED. Patient  
23  
24 demographic details and baseline characteristics are presented in *Table 1*.  
25  
26  
27  
28  
29  
30  
31  
32  
33  
34  
35  
36  
37  
38  
39  
40  
41  
42  
43  
44  
45  
46  
47  
48  
49  
50  
51  
52  
53  
54  
55  
56  
57  
58  
59  
60

**Table 1.** Participant demographic and clinical variables

| Variable                       | Intervention<br>N = 37 | Control<br>N = 35 |
|--------------------------------|------------------------|-------------------|
| Patient age (years)            |                        |                   |
| 0 – 3                          | 20 (54%)               | 27 (77%)          |
| 4 – 7                          | 9 (24%)                | 5 (14%)           |
| 8 – 16                         | 8 (22%)                | 3 (9%)            |
| Indigenous status              |                        |                   |
| Not indigenous                 | 34 (92%)               | 33 (94%)          |
| Aboriginal                     | 2 (5%)                 | 2 (6%)            |
| Torres Strait Islander         | 1 (3%)                 | 0 (0%)            |
| Gender                         |                        |                   |
| Male                           | 22 (59%)               | 19 (54%)          |
| Mechanism of injury            |                        |                   |
| Scald                          | 26 (70%)               | 28 (80%)          |
| Contact                        | 8 (22%)                | 7 (20%)           |
| Flame                          | 2 (5%)                 | 0 (0%)            |
| Flash                          | 1 (3%)                 | 0 (0%)            |
| Burn source                    |                        |                   |
| Hot beverage                   | 10 (27%)               | 14 (40%)          |
| Water from kettle/saucepan/tap | 7 (19%)                | 10 (29%)          |
| Noodles                        | 7 (19%)                | 3 (9%)            |
| Food (other)                   | 1 (3%)                 | 1 (3%)            |
| Stove/oven/barbeque            | 4 (11%)                | 3 (9%)            |
| Lighter                        | 2 (5%)                 | 0 (0%)            |
| Hair straightener/curling iron | 1 (3%)                 | 2 (6%)            |
| Fireplace/sun heated metal     | 2 (5%)                 | 2 (6%)            |
| Hot oil/wax                    | 2 (5%)                 | 0 (0%)            |
| Aerosol can explosion          | 1 (3%)                 | 0 (0%)            |
| Burn TBSA percentage           | 2 (1 - 4)              | 2 (1 - 4)         |
| Burn depth                     |                        |                   |
| Superficial partial thickness  | 30 (81%)               | 24 (69%)          |
| Deep dermal partial thickness  | 7 (19%)                | 11 (31%)          |
| Burn wound perfusion           |                        |                   |
|                                | † N = 48               | † N = 43          |
| LDI Mean PU                    | 696 (293)              | 679 (276)         |
| LDI Minimum PU                 | 144 (143)              | 110 (104)         |

1  
2  
3  
4  
5  
6  
7  
8  
9  
10  
11  
12  
13  
14  
15  
16  
17  
18  
19  
20  
21  
22  
23  
24  
25  
26  
27  
28  
29  
30  
31  
32  
33  
34  
35  
36  
37  
38  
39  
40  
41  
42  
43  
44  
45  
46  
47  
48  
49  
50  
51  
52  
53  
54  
55  
56  
57  
58  
59  
60

| Anatomical region affected            |          |          |
|---------------------------------------|----------|----------|
| Upper limb and/or hand                | 19 (51%) | 20 (57%) |
| Lower limb and/or foot                | 11 (30%) | 10 (29%) |
| Chest, abdomen, and/or back           | 12 (32%) | 13 (37%) |
| Head, face, and/or neck               | 8 (22%)  | 10 (29%) |
| Buttocks, perineum, and/or genitals   | 5 (14%)  | 2 (6%)   |
| Number of anatomical regions affected |          |          |
| 1                                     | 24 (65%) | 21 (60%) |
| 2                                     | 8 (22%)  | 9 (26%)  |
| 3                                     | 5 (14%)  | 4 (11%)  |
| 4                                     | 0 (0%)   | 1 (3%)   |
| Required medication in the ED         |          |          |
| Paracetamol                           | 32 (86%) | 33 (94%) |
| Ibuprofen                             | 26 (70%) | 28 (80%) |
| Oxycodone                             | 21 (57%) | 21 (60%) |
| Fentanyl                              | 28 (76%) | 27 (77%) |
| Nitrous                               | 4 (11%)  | 4 (11%)  |
| Ketamine                              | 1 (3%)   | 1 (3%)   |
| Methoxyflurane                        | 2 (5%)   | 1 (3%)   |
| Morphine                              | 1 (3%)   | 0 (0%)   |
| Midazolam                             | 1 (3%)   | 0 (0%)   |
| Polypharmacy                          |          |          |
| 0                                     | 1 (3%)   | 0 (0%)   |
| 1                                     | 4 (11%)  | 3 (9%)   |
| 2                                     | 4 (11%)  | 4 (11%)  |
| 3                                     | 14 (38%) | 12 (34%) |
| 4                                     | 10 (27%) | 12 (34%) |
| 5                                     | 2 (5%)   | 4 (11%)  |
| 6                                     | 2 (5%)   | 0 (0%)   |
| Distraction Techniques                |          |          |
| Nil                                   | 13 (35%) | 9 (26%)  |
| Lollies/food                          | 1 (3%)   | 4 (11%)  |
| Sleeping                              | 2 (5%)   | 1 (3%)   |
| Television/phone distraction          | 15 (41%) | 11 (31%) |
| Bubbles/toys                          | 5 (14%)  | 7 (20%)  |
| Music therapy/clown doctors           | 1 (3%)   | 2 (6%)   |
| Ditto™ distraction device             | 0 (0%)   | 1 (3%)   |



1  
2  
3  
4  
5  
6  
7  
8  
9  
10  
11  
12  
13  
14  
15  
16  
17  
18  
19  
20  
21  
22  
23  
24  
25  
26  
27  
28  
29  
30  
31  
32  
33  
34  
35  
36  
37  
38  
39  
40  
41  
42  
43  
44  
45  
46  
47  
48  
49  
50  
51  
52  
53  
54  
55  
56  
57  
58  
59  
60

| Definitive dressings applied in ED          |                  |                |
|---------------------------------------------|------------------|----------------|
| Acticoat™ 3 + Mepitel™ + Hypafix®           | 13 (35%)         | 10 (29%)       |
| Acticoat™ 7 + Mepitel™ + Hypafix®           | 7 (19%)          | 8 (23%)        |
| Mepilex Ag™ + Hypafix®                      | 16 (43%)         | 16 (46%)       |
| Paraffin wax                                | 1 (3%)           | 1 (3%)         |
| Time (minutes) to ED presentation           | N = 36           | N = 34         |
|                                             | 90 (66 – 137)    | 79 (60 – 119)  |
| Time (minutes) spent in ED                  | 106.5 (66 – 151) | 113 (76 – 180) |
| Time (minutes) dressing was applied to burn | 34 (22-61)       | 35 (5-150)     |
| Documented first aid (20 minutes CRW)       | 36 (97%)         | 34 (97%)       |
| QAS applied Burnaid®                        | 11 (30%)         | 7 (20%)        |
| QAS applied PVC film                        | 8 (22%)          | 11 (31%)       |
| High pain risk stratum                      | 8 (22%)          | 9 (26%)        |

Data are presented as median (IQR) for continuous measures, and N (%) for categorical measures unless stated otherwise. † As a result of patients having multiple burns to different anatomical regions, LDI scans were taken of 91 burn wounds from 58 patients:  $n = 48$  burns for the intervention group and  $n = 43$  wounds for the control. N = number of participants; ED = emergency department; CRW = cold running water; QAS = Queensland ambulance service, TBSA = total body surface area; LDI = laser Doppler imaging; PU = perfusion units; PVC = plasticized polyvinylchloride

No adverse events occurred in the intervention or control group. Sixteen participants ( $n = 4$  intervention and  $n = 12$  control) did not keep their randomised dressings on for the required 20-minute duration. Two main factors challenged dressing adherence during acute data collection in the ED. First, excessive wound exudate beneath the PVC film caused the dressings to slip off participant's burns. Second, a number of paediatric patients pulled at and removed their own dressings. Fidelity in these instances was compromised.

Throughout data collection, no children in the 4 – 8 age group reported having trouble self-reporting their pain to the investigator using the FPS – R. Data were collected for dressing changes four ( $n = 8$ ), five ( $n = 4$ ), six ( $n = 1$ ), seven ( $n = 1$ ), eight ( $n = 1$ ), nine ( $n = 1$ ) and ten ( $n = 1$ ) for patients requiring multiple dressing changes, but were not included in the analysis due to low numbers of participants in the trial requiring more than four dressings.

Successful LDI scans were completed for 58 out of the 72 participants during their first burn dressing change.

The revised standard scale of 0 – 1000 PU was used to measure burn depth from LDI scans. In accordance with previous studies, 0 – 250 PU indicated full thickness injuries, 250 – 625 PU represented deep dermal

1  
2 partial thickness burns, and >625 PU corresponded to superficial partial thickness burns [35]. T-tests  
3  
4 revealed no significant difference in LDI scores between the intervention or control group for mean  
5  
6 perfusion,  $p = 0.79$ . In addition, no difference in minimum LDI scores were found between the intervention  
7  
8 or control group,  $p = 0.20$ . Mean PUs for both groups were greater than or equal to 625 PU indicating  
9  
10 superficial partial thickness burn injuries. These values support clinical judgement from the treating surgical  
11  
12 consultants for burn depth assessment (see *Table 1*.)  
13  
14

### 15 3.2 Primary outcome

16  
17 Acute pain scores collected in the ED before and after the application of the randomised dressing, and before  
18  
19 and after silver dressing application, are reported in *Table 2* for the two groups. No significant between-  
20  
21 group differences in pain scores (assessed using the FLACC scale from nursing staff) were found between  
22  
23 paediatric patients who received Burnaid® dressings and those who received PVC film as an acute burn  
24  
25 dressing in the ED following initial presentation to the QCH and CRW first aid. No significant group  
26  
27 differences in FLACC scores were found post-randomised dressing application (Mean Difference: -0.1, 95%  
28  
29 CI: -0.7 to 0.5,  $p = 0.72$ ), pre-silver dressing application (Mean Difference: -0.3, 95% CI: -1 to 0.5,  $p = 0.51$ ),  
30  
31 or post-silver dressing application (Mean Difference: 0, 95% CI: -0.8 to 0.9,  $p = 0.92$ ).  
32  
33  
34  
35  
36  
37  
38  
39  
40  
41  
42  
43  
44  
45  
46  
47  
48  
49  
50  
51  
52  
53  
54  
55  
56  
57  
58  
59  
60

**Table 2.** Acute pain scores in the ED

| Pain scale                   | Time point    | N  | Intervention<br>Mean (SD) | N  | Control<br>Mean (SD) | Adjusted<br>Mean<br>Difference | 95% CI      | <i>p</i> value |
|------------------------------|---------------|----|---------------------------|----|----------------------|--------------------------------|-------------|----------------|
| FLACC<br>(0 – 10 scale)      | Pre-dressing  | 35 | 1.2 (2.1)                 | 23 | 0.7 (1.4)            | -                              | -           | -              |
|                              | Post-dressing | 36 | 0.4 (1.0)                 | 35 | 0.4 (0.7)            | -0.1                           | -0.7 to 0.5 | 0.72           |
|                              | Pre-silver    | 36 | 0.4 (1.2)                 | 34 | 0.6 (1.6)            | -0.3                           | -1 to 0.5   | 0.51           |
|                              | Post-silver   | 35 | 0.8 (1.7)                 | 33 | 0.7 (1.5)            | 0                              | -0.8 to 0.9 | 0.92           |
|                              | Peak pain     | 36 | 3.4 (2.4)                 | 34 | 3.9 (2.8)            | 0.6                            | 1.7 to 0.5  | 0.29           |
| VAS<br>(0 – 100)             | Pre-dressing  | 9  | 38 (29)                   | 2  | 20 (14)              | -                              | -           | -              |
|                              | Post-dressing | 10 | 20 (22)                   | 4  | 28 (36)              | -14                            | -37 to 9    | 0.22           |
|                              | Pre-silver    | 11 | 16 (21)                   | 5  | 8 (18)               | 4                              | -18 to 26   | 0.74           |
|                              | Post-silver   | 7  | 31 (25)                   | 4  | 25 (44)              | -1                             | -31 to 29   | 0.96           |
| FPS – R<br>(0 – 10)          | Pre-dressing  | 9  | 3.3 (3.7)                 | 7  | 3.6 (2.6)            | -                              | -           | -              |
|                              | Post-dressing | 10 | 2.8 (4.2)                 | 8  | 2.4 (3.0)            | 0.3                            | -1.7 to 2.2 | 0.78           |
|                              | Pre-silver    | 11 | 1.5 (3.3)                 | 11 | 1.3 (3.1)            | 0.6                            | -1.8 to 2.9 | 0.64           |
|                              | Post-silver   | 10 | 2.9 (3.5)                 | 10 | 3.0 (4.1)            | 0.1                            | -3.1 to 3.3 | 0.96           |
| VAS<br>Observer<br>(0 – 100) | Pre-dressing  | 34 | 32 (28)                   | 22 | 30 (21)              | -                              | -           | -              |
|                              | Post-dressing | 34 | 22 (24)                   | 31 | 21 (19)              | 1                              | -8 to 11    | 0.78           |
|                              | Pre-silver    | 35 | 18 (20)                   | 34 | 18 (25)              | 0                              | -11 to 11   | 0.96           |
|                              | Post-silver   | 33 | 24 (25)                   | 32 | 18 (26)              | 6                              | -7 to 18    | 0.36           |

FLACC = face, legs, activity, cry, consolability scale; VAS = visual analogue scale; FPS-R = faces pain scale revises; SD = standard deviation; CI = confidence interval. \* Adjusted Mean Difference = Intervention Group – Control Group.

### 3.2.1 Ancillary Pain Measures

#### 3.2.1.1. Parent and Caregiver Pain Scores (Observer VAS)

There were no significant differences in pain scores between the control and intervention group for observational pain ratings from parents and caregivers assessed using the VAS Observer in the ED. No significant between-group differences in VAS Observer pain scores were found between the intervention and control groups for post-randomised dressing application (Mean Difference: 1, 95% CI: -8 to 11,  $p = 0.78$ ), pre-silver dressing application (Mean Difference: 0, 95% CI: -11 to 11,  $p = 0.96$ ), or post-silver dressing application (Mean Difference: 6, 95% CI: -7 to 18,  $p = 0.36$ ) time points.

### 3.2.1.2 Child reported pain (FPS-R and VAS)

Child self-report pain scores measured using the FPS-R and VAS showed no significant between-group differences. Self-report FPS-R scores assessed post-dressing application (Mean Difference: 0.3, 95% CI: -1.7 to 2.2,  $p = 0.78$ ), pre-silver application (Mean Difference: 0.6, 95% CI: -1.8 to 2.9,  $p = 0.64$ ), and post-silver dressing application (Mean Difference: 0.1, 95% CI: -3.1 to 3.3,  $p = 0.96$ ) showed no significant group differences. As burn injuries often affect infants and children under the age of five, a small number of children recruited into the trial were aged over eight. The VAS for Pain is designed for children aged eight years and older. As a consequence of the median patient age, low numbers of participants were able to use this self-report pain scale and therefore limited statistical tests that could be performed. Median self-report VAS scores are presented in *Table 2* but should be interpreted with consideration of this sample size limitation.

## 3.3 Secondary outcomes

### 3.3.1 Physiological measures

No significant difference in mean pulse rate (Mean Difference: -3, 95% CI: -11 to 5,  $p = 0.41$ ) or temperature (Mean Difference: 0.6, 95% CI: -0.13 to 0.24,  $p = 0.53$ ) was detected between intervention and control groups following the application of the randomised dressings in the ED (see *Table 3*).

**Table 3.** Physiological measures in the ED

| Measure                     | Time point    | N  | Intervention  | N  | Control       | Adjusted Mean Difference | 95% CI        | p value |
|-----------------------------|---------------|----|---------------|----|---------------|--------------------------|---------------|---------|
|                             |               |    | Mean (SD)     |    | Mean (SD)     |                          |               |         |
| Pulse<br>(Beats/minute)     | Pre-dressing  | 34 | 111 (27)      | 24 | 112 (20)      | -                        | -             | -       |
|                             | Post-dressing | 34 | 104 (26)      | 32 | 109 (21)      | -3                       | -11 to 5      | 0.41    |
|                             | Pre-silver    | 33 | 105 (26)      | 32 | 113 (21)      | -8                       | -16 to 1      | 0.07    |
|                             | Post-silver   | 29 | 109 (25)      | 31 | 113 (24)      | -3                       | -12 to 6      | 0.52    |
| Temperature<br>(° Celsius)  | Pre-dressing  | 35 | 36.34         | 25 | 36.42         | -                        | -             | -       |
|                             | Post-dressing | 36 | 36.42         | 33 | 36.36         | 0.6                      | -0.13 to 0.24 | 0.53    |
|                             | Pre-silver    | 36 | 36.43         | 33 | 36.33         | 0.12                     | -0.12 to 0.37 | 0.33    |
|                             | Post-silver   | 34 | 36.44         | 33 | 36.32         | 0.14                     | -0.14 to 0.40 | 0.29    |
| Alpha-amylase<br>(units/mL) |               |    | † Mean (×/SD) |    | † Mean (×/SD) | † Ratio of Means         | 95% CI        |         |
|                             | Pre-dressing  | 19 | 48 (×/2)      | 8  | 46 (×/3)      | -                        | -             | -       |
|                             | Post-dressing | 26 | 54 (×/3)      | 20 | 37 (×/2)      | 1.53                     | 0.93 to 2.53  | 0.10    |

SD = standard deviation; CI = confidence interval; mL = millilitre. \* Adjusted Mean Difference = Intervention Group – Control Group. † Alpha-amylase data reported as geometric mean, geometric standard deviation, and ratio of geometric means.

### 3.3.2 Re-epithelialisation

Median (IQR) time to re-epithelialisation for the intervention group was 9 days (6.25 – 10.75) and 9 days (7.5 – 14) for the control group. Clinical assessment from treating surgeons showed no significant between-group differences in time to 95% re-epithelialisation, with a median difference (95% CI) equal to -1 (-3 to 1),  $p = 0.26$ . With regards to the blinded assessment of burn wound images, exact agreement between the treating surgical consultants and blinded review panel was used to examine agreement between health professionals measuring time to re-epithelialisation [36]. Agreement on evaluation of re-epithelialisation was found to be good (69% agreement) between the three expert reviewers and the treating surgeons (see *Appendix A* for additional agreement data).

### 3.3.3 Biochemical stress markers

No significant difference in sAA was found between the intervention and control group following the application of the randomised dressing during acute care in the ED (see *Table 3*). Children who received Burnaid® dressings did not show a reduction in the biochemical stress marker in comparison to paediatric patients who received PVC film (Geometric Mean Ratio: 1.53, 95% CI = 0.93 to 2.53,  $p = 0.10$ ). Levels of

1  
2 sAA collected in the waiting room during dressing changes one (Geometric Mean Ratio: 1, 95% CI = 0.65 –  
3  
4 1.56,  $p = 0.97$ ) and two (Geometric Mean Ratio: 1.14, 95% CI = 0.48 – 2.71,  $p = 0.75$ ) showed no significant  
5  
6 differences between children who received Burnaid® dressings in the ED and those who received PVC film  
7  
8 (see *Appendix C*).  
9

### 10 3.3.4 Pain at first, second, and third dressing changes

11  
12 Pain scores assessed in the Burns Outpatient Department during follow up dressing changes one to three are  
13  
14 reported in *Appendix B* for the two treatment groups. No statistical differences in observational or child self-  
15  
16 report follow up pain scores were found between children who received Burnaid® dressings and those who  
17  
18 received PVC film during acute care. Temperature and pulse rate assessed during follow up dressing changes  
19  
20 (as physiological indicators of pain) also showed no significant group differences over dressing changes one  
21  
22 to three (see *Appendix C* for physiological data).  
23  
24  
25

## 26 4. Discussion

27  
28 There has been an emergence of research demonstrating the importance of acute pain control in traumatic  
29  
30 injuries, emphasising the association between untreated pain and maladaptive outcomes such as: prolonged  
31  
32 wound healing [4, 5], long-term emotional disorders [6, 7], and chronic pain conditions [8, 9]. Pain is a chief  
33  
34 complaint for patients with burn injuries in the acute setting [37, 38]. Therefore, pre-hospital and acute care  
35  
36 providers have a crucial role in recognising and reducing the burden of pain for these patients. Reducing  
37  
38 acute pain is of particular importance for paediatric burn patients who often have to undergo numerous  
39  
40 painful and distressing medical procedures during their care. The better pain and distress are managed during  
41  
42 a child's first visit to the ED for burn wound treatment– the lower the child's chances are of developing  
43  
44 anticipatory anxiety and avoidance behaviours for future medical procedures [39]. Effective non-  
45  
46 pharmacological interventions for the management of acute burn pain are needed to supplement  
47  
48 pharmacological methods of pain reduction in paediatric patients [32, 40]. We were pleasantly reassured to  
49  
50 find most burn patients presenting to our ED had mild to no pain. Because of this, examining the  
51  
52 effectiveness of acute burn dressings on reducing acute pain score was restricted – and results from this  
53  
54 prospective RCT should be interpreted with the acknowledgement of this limitation. At present, there are no  
55  
56 high level trials supporting the use of Burnaid® hydrogel dressings for acute burn management. The aim of  
57  
58 this trial was to fill this gap in the literature, and examine the effectiveness of Burnaid® dressings on  
59  
60

1  
2 reducing acute pain scores in children with thermal burns. To the best of our knowledge, this is the first  
3  
4 prospective RCT conducted in a paediatric burn population examining the analgesic properties of a hydrogel  
5  
6 burn dressing in an ED setting.  
7

8  
9 Results from this prospective RCT should be interpreted with consideration of several limitations. First, very  
10  
11 few participants had moderate to severe pain scores following their initial presentation to the QCH prior to  
12  
13 recruitment into the trial. More than 60% of paediatric burn patients received observational pain scores of zero  
14  
15 (out of ten using the FLACC pain scale) from ED nursing staff - see *Appendix D* for complete pain score  
16  
17 frequencies. Moreover, an additional 19% of children received pain ratings equal to one (using the ten-point  
18  
19 scale) following initial presentation to the ED. A significant effect of the intervention on reducing acute burn  
20  
21 pain might not have been identified in this trial because pain scores were so low following patient's first  
22  
23 presentation to hospital for their burn. Second, pre-hospital and referral services in Queensland acted to  
24  
25 provide comprehensive pharmacotherapies for pain management to paediatric patients with thermal burns  
26  
27 during transportation to the QCH. So much so that pain scores might have been too low to observe a  
28  
29 significant reduction following application of the intervention or control. A large proportion (78%) of patients  
30  
31 enrolled in the trial received three or more medication classes during their acute burn care in the ED – the  
32  
33 most common combination being paracetamol, ibuprofen, fentanyl for both groups (see *Table 1*).  
34  
35

36  
37 The last limitation relates to potential moderating effects. Non-pharmacological interventions such as  
38  
39 distraction are commonplace during paediatric medical procedures. Almost 70% of all participants received  
40  
41 additional distraction techniques during their acute burn treatment in the ED such as video distraction using  
42  
43 mobile phones and television, clown doctors, music therapists, bubbles, toys, and lollies (see *Table 1*). These  
44  
45 non-pharmacological interventions were left in place to simulate a real-world pragmatic trial, however could  
46  
47 have moderated the effect of the intervention. An effect of the intervention on reducing acute pain scores  
48  
49 might not have been detected due to the low pain scored at initial presentation and analgesia on-board at the  
50  
51 time of recruitment and data collection. It is therefore recommended that this research be replicated in the pre-  
52  
53 hospital setting – perhaps where acute pain scores are higher and thus analgesic benefits of the two acute burn  
54  
55 dressings may be more pronounced.  
56  
57  
58  
59  
60

## 5. Conclusion

It was predicted that Burnaid® dressings would provide superior analgesia for paediatric burn patients when applied as an adjunct to CRW first aid, in comparison to PVC film (current standard practice). However, the effect of the intervention on reducing acute pain scores was not supported in this investigation and we were unable to show a clinically relevant treatment effect caused by the intervention – Burnaid® hydrogel dressings. Results from this RCT found no significant between-group differences in observational pain scores assessed using the FLACC pain scale from ED nursing staff – the primary outcome of the trial. Moreover, no significant group-differences in parent/caregiver pain scores or child self-report pain scores were identified during acute care in the ED or follow up wound care in the Burns OPD. The effect of the intervention on additional outcomes including, time to re-epithelialisation, stress, temperature, heart rate, and need for analgesic medication was also not supported. Research investigating adjunctive methods of pain control for children with burns holds great translational value. It was predicted that an acute burn dressing with additional cooling and evaporative properties would provide superior pain relief for children with thermal burns, in comparison to PVC film. This was not supported, and Burnaid® dressings do not appear to provide superior pain relief in comparison to PVC film when applied as an acute burn dressing following first aid and initial presentation to the ED.



## References

1. Scott LE, Crilly J, Chaboyer W, Jessup M. Paediatric pain assessment and management in the emergency setting: The impact of a paediatric pain bundle. *Int Emerg Nurs*. 2013;21(3):173-19.
2. Summer GJ, Puntillo KA, Miaskowski C, Green PG, Levine JD. Burn injury pain: The continuing challenge. *J Pain*. 2007;8(7):533-48.
3. Morgan M, Deuis JR, Frøsig-Jørgensen M, Lewis RJ, Cabot PJ, Gray PD, Vetter I. Burn pain: A systematic and critical review of epidemiology, pathophysiology, and treatment. *Pain Med*. 2018;19(4):708-34.
4. Brown NJ, Kimble RM, Rodger S, Ware RS, Cuttle L. Play and heal: Randomised controlled trial of Ditto™ intervention efficacy on improving re-epithelialization in pediatric burns. *Burns*. 2013;40(2):204-13.
5. Brown NJ, Kimble RM, Gramotnev G, Rodger S, Cuttle L. Predictors of re-epithelialization in pediatric burn. *Burns*. 2013.
6. De Young AC, Kenardy JA, Cobham VE, Kimble R. Prevalence, comorbidity and course of trauma reactions in young burn-injured children. *J Child Psychol Psychiatry*. 2012;53(1):56-63.
7. Norman SB, Stein MB, Dimsdale JE, Hoyt DB. Pain in the aftermath of trauma is a risk factor for post-traumatic stress disorder. *Psychol Med*. 2008;38(4):533-42.
8. Dauber A, Osgood PF, Breslau AJ, Vernon HL, Carr DB. Chronic Persistent Pain After Severe Burns: A Survey of 358 Burn Survivors. *Pain Med*. 2002;3(1):6-17.
9. Wollgarten-Hadamek I, Hohmeister J, Zohsel K, Flor H, Hermann C. Do school-aged children with burn injuries during infancy show stress-induced activation of pain inhibitory mechanisms? *Eur J Pain*. 2011;15(4):423.e1-e10.
10. Cuttle L, Kempf M, Liu PY, Kravchuk O, Kimble RM. The optimal duration and delay of first aid treatment for deep partial thickness burn injuries. *Burns*. 2010;36(5):673-9.
11. Bartlett N, Yuan J, Holland AJ, Harvey JG, Martin HC, La Hei ER, et al. Optimal duration of cooling for an acute scald contact burn injury in a porcine model. *J Burn Care Res*. 2008;29(5):828-34.
12. The Australian and New Zealand Burn Association. Emergency management of severe burns. 13 ed: Australian and New Zealand Burn Association; 2009.
13. Cuttle L, Kempf M, Kravchuk O, Phillips GE, Mill J, Wang X-Q, et al. The optimal temperature of first aid treatment for partial thickness burn injuries. *Wound Repair Regen*. 2008;16(5):626-34.
14. Griffin BR, Frear CC, Babl F, Oakley E, Kimble RM. Cool Running Water First Aid Decreases Skin Grafting Requirements in Pediatric Burns: A Cohort Study of Two Thousand Four Hundred Ninety-five Children. *Ann Emerg Med*. 2019.
15. Allison K, Porter K. Consensus on the pre-hospital approach to burns patient management. *Injury*. 2004;35(8):734-8.
16. Fein M, Quinn J, Watt K, Nichols T, Kimble R, Cuttle L. Prehospital paediatric burn care: New priorities in paramedic reporting. *Emerg Med Australas*. 2014;26(6):609-15.

17. Holbert MD, Griffin BR, McPhail SM, Ware RS, Foster K, Bertoni DC, et al. Effectiveness of a hydrogel dressing as an analgesic adjunct to first aid for the treatment of acute paediatric thermal burn injuries: study protocol for a randomised controlled trial. *Trials*. 2019;20(1):13.
18. Milner RH, Hudson SJ, Reid CA. Plasticized polyvinyl chloride film as a primary burns dressing: a microbiological study. *Burns*. 1988;14(1):62-5.
19. Lendrum J, Bowen-Jones E. A new dressing for burns: Enclosure in a plasticized polyvinyl chloride sheet. *Burns*. 1976;2(2):86-9.
20. von Baeyer CL. Children's self-report of pain intensity: what we know, where we are headed. *Pain research & management*. 2009;14(1):39-45.
21. Hicks CL, von Baeyer CL, Spafford PA, van Korlaar I, Goodenough B. The Faces Pain Scale – Revised: Toward a common metric in pediatric pain measurement. *Pain*. 2001;93(2):173-83.
22. Bailey B, Gravel J, Daoust R. Reliability of the visual analog scale in children with acute pain in the emergency department. *Pain*. 2012;153(4):839-42.
23. Stinson NJ, Kavanagh NT, Yamada NJ, Gill NN, Stevens NB. Systematic review of the psychometric properties, interpretability and feasibility of self-report pain intensity measures for use in clinical trials in children and adolescents. *Pain*. 2006;125(12):143-57.
24. Taddio A, O'Brien L, Ipp M, Stephens D, Goldbach M, Koren G. Reliability and validity of observer ratings of pain using the visual analog scale (VAS) in infants undergoing immunization injections. *Pain*. 2009;147(123):141-6.
25. Brown NJ, Kimble RM, Rodger S, Ware RS, McWhinney BC, Ungerer JPJ, et al. Biological markers of stress in pediatric acute burn injury. *Burns*. 2014;40(5):887-95.
26. Dibildox M, Jeschke MG, Herndon DN. Burn Injury, Rule of Nines. In: Vincent J-L, Hall JB, editors. *Encyclopedia of Intensive Care Medicine*. Berlin, Heidelberg: Springer Berlin Heidelberg; 2012. 417-9.
27. Wang X-Q, Mill J, Kravchuk O, Kimble RM. Ultrasound assessed thickness of burn scars in association with laser Doppler imaging determined depth of burns in paediatric patients. *Burns*. 2010;36(8):1254-62.
28. Mill J, Cuttle L, Harkin DG, Kravchuk O, Kimble RM. Laser Doppler imaging in a paediatric burns population. *Burns*. 2009;35(6):824-31.
29. Gill P. The critical evaluation of laser Doppler imaging in determining burn depth. *Int J Burns Trauma*. 2013;3(2):72-7.
30. Štětinský J, Klosová H, Kolářová H, Šalounová D, Bryjová I, Hledík S. The time factor in the LDI (Laser Doppler Imaging) diagnosis of burns. *Lasers Surg Med*. 2015;47(2):196-202.
31. Wearn C, Lee KC, Hardwicke J, Allouni A, Bamford A, Nightingale P, et al. Prospective comparative evaluation study of Laser Doppler Imaging and thermal imaging in the assessment of burn depth. *Burns*. 2018;44(1):124-33.
32. Miller K, Rodger S, Kipping B, Kimble RM. A novel technology approach to pain management in children with burns: A prospective randomized controlled trial. *Burns*. 2011;37(3):395.

1  
2  
3  
4  
5  
6  
7  
8  
9  
10  
11  
12  
13  
14  
15  
16  
17  
18  
19  
20  
21  
22  
23  
24  
25  
26  
27  
28  
29  
30  
31  
32  
33  
34  
35  
36  
37  
38  
39  
40  
41  
42  
43  
44  
45  
46  
47  
48  
49  
50  
51  
52  
53  
54  
55  
56  
57  
58  
59  
60

33. StataCorp. Stata Statistical Software: Release 16. College Station TSL.
34. Limpert E, Stahel WA. Problems with Using the Normal Distribution - and Ways to Improve Quality and Efficiency of Data Analysis. PLoS One. 2011.
35. Chester SJ, Tyack Z, De Young A, Kipping B, Griffin B, Stockton K, et al. Efficacy of hypnosis on pain, wound-healing, anxiety, and stress in children with acute burn injuries: A randomised controlled trial. *Pain*. 2018;159(9):1790.
36. de Vet HCW, Terwee CB, Knol DL, Bouter LM. When to use agreement versus reliability measures. *J Clin Epidemiol*. 2006;59(10):1033-9.
37. Yuxiang L, Lingjun Z, Lu T, Mengjie L, Xing M, Fengping S, et al. Burn patients' experience of pain management: A qualitative study. *Burns*. 2012;38(2):180-6.
38. Nedelec JB, Carrougher JG. Pain and Pruritus Postburn Injury. *J Burn Care Res*. 2017;38(3):142-5.
39. Michalska JK, Feldman SJ, Abend LR, Gold CA, Dildine ET, Palacios-Barrios EE, et al. Anticipatory Effects on Perceived Pain: Associations With Development and Anxiety. *Psychosom Med*. 2018;80(9):853-60.
40. Miller K, Rodger S, Bucolo S, Greer R, Kimble RM. Multi-modal distraction. Using technology to combat pain in young children with burn injuries. *Burns*. 2010;36(5):647-58.

## Declarations

### *Funding*

This work was supported by a research grant given to The University of Queensland by Mundipharma (Grant Number: 364010399) and an Australian Government Research Training Scholarship awarded to the primary investigator. Mundipharma had no role in the development of the trial, data collection, data analysis, or interpretation of results.

### *Conflicts of Interests*

All authors who contributed to this original research manuscript declare no conflicts of interests. All authors declare no financial or other interests in the product (Burnaid®) or distributor of the product (Mundipharma).

All authors declare no past or existing relationships with the manufacturer or distributor of the product.

Moreover, all authors declare no additional associations with the product manufacturer or distributor including consultancies, stock ownership, or other equity interests or patent-licensing arrangements.

### *Author Statement*

RMK and BRG conceived the research, designed the trial, and obtained research funding. MDH undertook participant recruitment, acute and follow up data collection, data management, and interpretation of results. MDC provided statistical support and conducted the formal analyses. MDH wrote the draft manuscript, and all authors provided critical review of the article and approved the final manuscript. MDH takes responsibility for the paper as a whole.

### *Acknowledgments*

We want to thank all the children and families for their time and participation in our research. We also wish to acknowledge and give thanks to the Burns, Surgical, and ED staff at the Queensland Children's Hospital for their support in the development and implementation of this research.

### *Data Sharing*

Additional data available upon request.

### *Word Count*

4623

Figure 1. Consort Flow Diagram

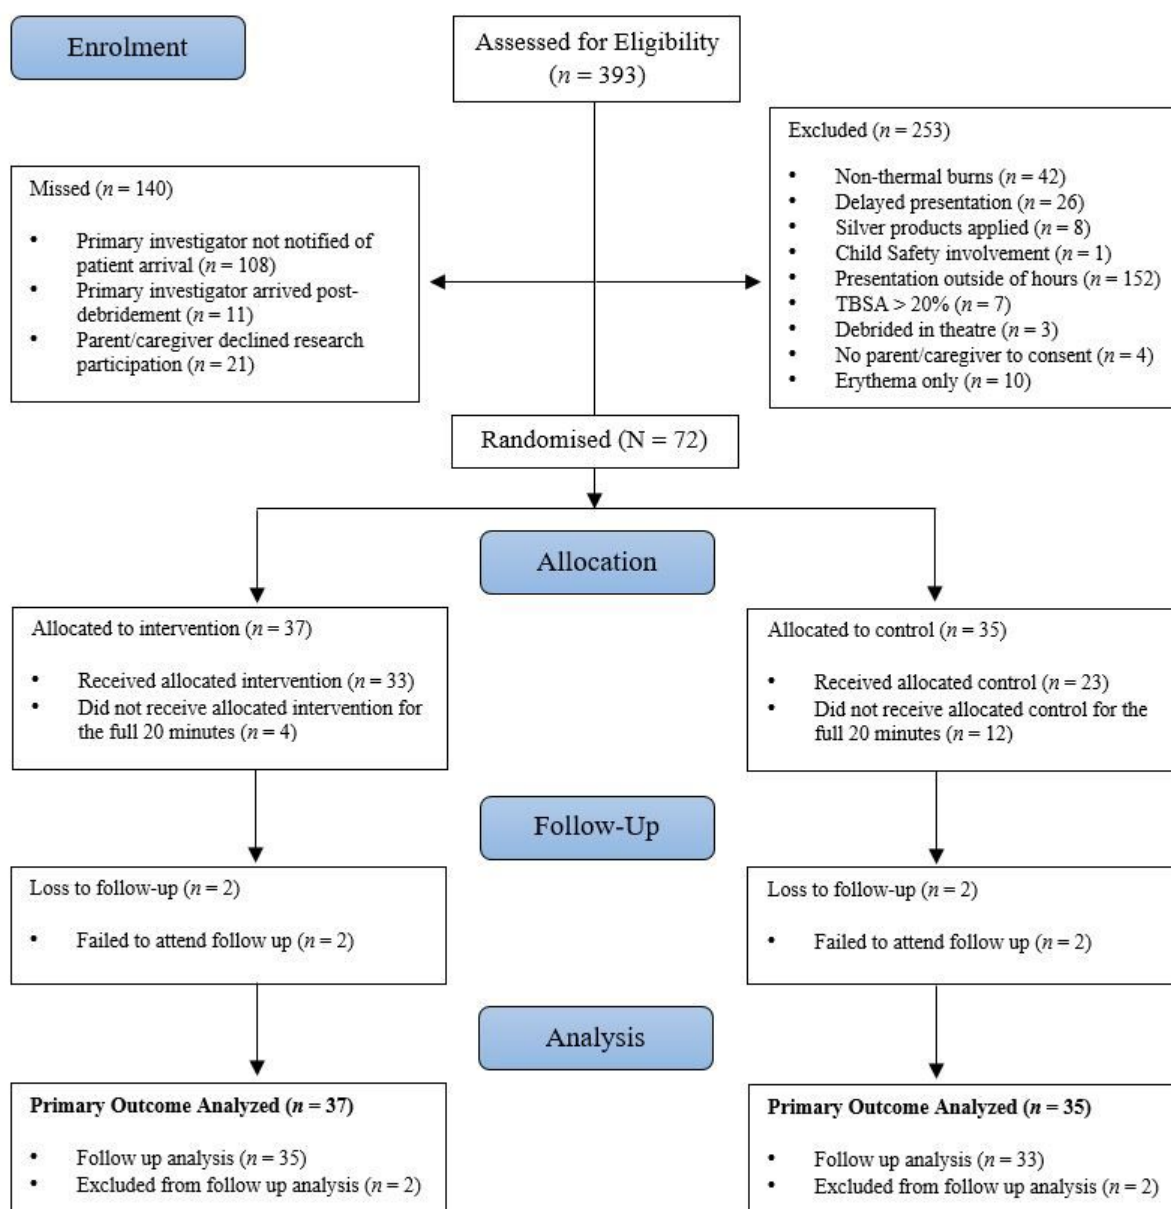

**Figure 2.** Pain assessment timepoints during acute and follow up care

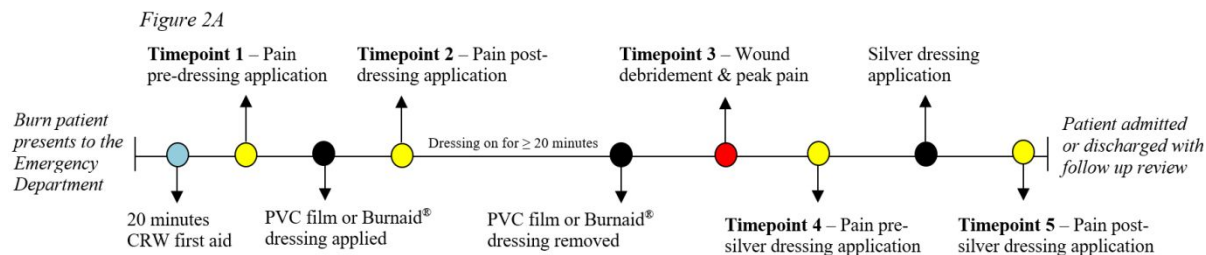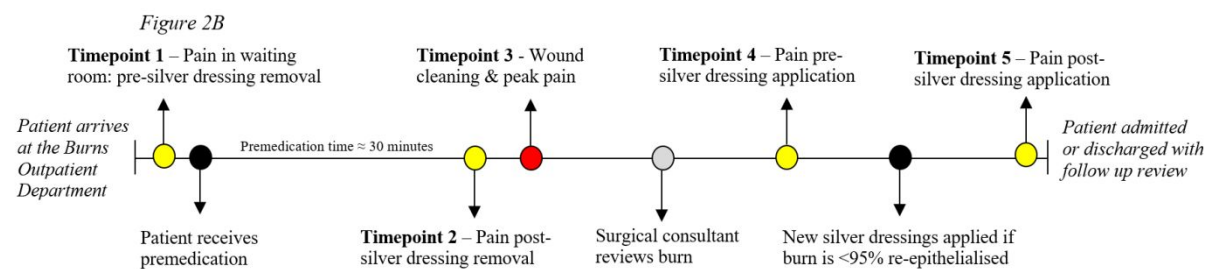

**Appendix A.** Exact agreement between clinicians assessing time to re-epithelialization: Treating surgical consultant versus blinded expert panel

| Clinicians                | Agreement between Clinicians |
|---------------------------|------------------------------|
| Consultant and Reviewer 1 | 64%                          |
| Consultant and Reviewer 2 | 64%                          |
| Consultant and Reviewer 3 | 69%                          |
| Reviewer 1 and Reviewer 2 | 71%                          |
| Reviewer 1 and Reviewer 3 | 71%                          |
| Reviewer 2 and Reviewer 3 | 75%                          |

## Appendix B. Pain at dressing changes one, two, and three

| Pain Assessment Timepoint             | N (Intervention) | Intervention<br>Mean (SD) | N (Control) | Control<br>Mean (SD) | Adjusted Mean<br>Difference (95% CI) | <i>p</i> value |
|---------------------------------------|------------------|---------------------------|-------------|----------------------|--------------------------------------|----------------|
| <b>Nurse: FLACC (0 – 10)</b>          |                  |                           |             |                      |                                      |                |
| 1 <sup>st</sup> Dressing Change       |                  |                           |             |                      |                                      |                |
| Pre-removal                           | 36               | 0.0 (0.0)                 | 33          | 0.0 (0.2)            | 0.0 (-0.1 to 0)                      | 0.3            |
| Post-removal                          | 34               | 1.3 (1.7)                 | 31          | 1.1 (1.6)            | 0.2 (-0.7 to 1.0)                    | 0.69           |
| Pre-silver                            | 28               | 0.1 (0.3)                 | 29          | 0.1 (0.4)            | 0.0 (-0.2 to 0.2)                    | 0.73           |
| Post-silver                           | 28               | 0.4 (0.9)                 | 28          | 0.2 (0.5)            | 0.2 (-0.2 to 0.6)                    | 0.36           |
| Peak FLACC                            | 34               | 2.1 (1.9)                 | 31          | 1.7 (1.5)            | 0.3 (-0.5 to 1.2)                    | 0.41           |
| 2 <sup>nd</sup> Dressing Change       |                  |                           |             |                      |                                      |                |
| Pre-removal                           | 26               | 0.0 (0.0)                 | 28          | 0.0 (0.0)            | 0.0 (0.0)                            | -              |
| Post-removal                          | 24               | 1.1 (1.7)                 | 27          | 0.6 (1.3)            | 0.5 (-0.4 to 1.3)                    | 0.25           |
| Pre-silver                            | 12               | 0.0 (0.0)                 | 16          | 0.5 (1.5)            | -0.5 (-1.4 to 0.4)                   | 0.28           |
| Post-silver                           | 12               | 0.2 (0.4)                 | 14          | 0.3 (0.7)            | -0.1 (-0.6 to 0.4)                   | 0.62           |
| Peak FLACC                            | 24               | 1.6 (1.8)                 | 27          | 1.0 (1.6)            | 0.6 (-0.3 to 1.6)                    | 0.20           |
| 3 <sup>rd</sup> Dressing Change       |                  |                           |             |                      |                                      |                |
| Pre-removal                           | 7                | 0.0 (0.0)                 | 14          | 0.0 (0.0)            | 0.0 (0.0)                            | -              |
| Post-removal                          | 7                | 0.1 (0.4)                 | 12          | 0.6 (0.7)            | -0.4 (-1.0 to 0.1)                   | 0.13           |
| Pre-silver                            | 3                | 0.3 (0.6)                 | 7           | 0.4 (1.1)            | -0.1 (-1.7 to 1.5)                   | 0.9            |
| Post-silver                           | 3                | 0.0 (0.0)                 | 7           | 0.0 (0.0)            | 0.0 (0.0)                            | -              |
| Peak FLACC                            | 7                | 1.4 (1.4)                 | 13          | 0.8 (0.9)            | 0.6 (-0.5 to 1.7)                    | 0.27           |
| <b>Parent: VAS Observer (0 – 100)</b> |                  |                           |             |                      |                                      |                |
| 1 <sup>st</sup> Dressing Change       |                  |                           |             |                      |                                      |                |
| Pre-removal                           | 34               | 8.2 (18.8)                | 32          | 3.4 (9.7)            | 5 (-3.0 to 12.0)                     | 0.2            |
| Post-removal                          | 33               | 31.5 (37.9)               | 31          | 18.5 (23.8)          | 13 (-3.0 to 29.0)                    | 0.11           |
| Pre-silver                            | 27               | 18.9 (28.2)               | 29          | 9.7 (17.6)           | 9 (-3.0 to 22.0)                     | 0.14           |
| Post-silver                           | 27               | 19.1 (26.7)               | 28          | 7.1 (20.2)           | 12 (-1.0 to 25.0)                    | 0.07           |
| Peak VAS                              | 33               | 42.1 (35.2)               | 29          | 29.5 (22.3)          | 13 (-3.0 to 28.0)                    | 0.10           |
| 2 <sup>nd</sup> Dressing Change       |                  |                           |             |                      |                                      |                |
| Pre-removal                           | 25               | 4.4 (11.6)                | 28          | 1.4 (4.5)            | 3 (-2.0 to 8.0)                      | 0.21           |
| Post-removal                          | 23               | 14.1 (23.2)               | 27          | 9.6 (20.5)           | 5 (-8.0 to 17.0)                     | 0.47           |
| Pre-silver                            | 11               | 7.7 (19.9)                | 15          | 2.7 (4.6)            | 5 (-6.0 to 16.0)                     | 0.35           |
| Post-silver                           | 11               | 12.3 (21.1)               | 13          | 3.1 (8.5)            | 9 (-4.0 to 22.0)                     | 0.16           |
| Peak VAS                              | 22               | 21.4 (30.3)               | 26          | 13.8 (21.7)          | 8 (-8.0 to 22.0)                     | 0.32           |
| 3 <sup>rd</sup> Dressing Change       |                  |                           |             |                      |                                      |                |



|                                 |              |   |             |    |             |                      |      |
|---------------------------------|--------------|---|-------------|----|-------------|----------------------|------|
|                                 | Pre-removal  | 7 | 4.3 (11.3)  | 13 | 2.3 (8.3)   | 2 (-7.0 to 11.0)     | 0.66 |
|                                 | Post-removal | 6 | 11.7 (16.0) | 11 | 8.2 (10.8)  | 3 (-10.0 to 17.0)    | 0.60 |
|                                 | Pre-silver   | 6 | 5.0 (7.1)   | 7  | 8.6 (12.1)  | -4 (-25.0 to 18.0)   | 0.71 |
|                                 | Post-silver  | 3 | 0.0 (0.0)   | 6  | 3.3 (8.2)   | -3 (-18.0 to 12.0)   | 0.60 |
|                                 | Peak VAS     | 5 | 20.0 (14.1) | 11 | 11.8 (11.7) | 8 (-6.0 to 23.0)     | 0.24 |
| <b>Child: FPS – R</b>           |              |   |             |    |             |                      |      |
| 1 <sup>st</sup> Dressing Change |              |   |             |    |             |                      |      |
|                                 | Pre-removal  | 8 | 0.00 (0.00) | 10 | 0.1 (0.3)   | -0.1 (-.3 to .1)     | 0.39 |
|                                 | Post-removal | 9 | 2.7 (4.4)   | 9  | 2.4 (3.4)   | 0.2 (-3.7 to 4.1)    | 0.91 |
|                                 | Pre-silver   | 7 | 2.0 (3.5)   | 8  | 2.3 (3.6)   | -0.2 (-4.2 to 3.7)   | 0.89 |
|                                 | Post-silver  | 7 | 0.3 (0.8)   | 6  | 1.0 (1.7)   | -0.7 (-2.3 to .8)    | 0.33 |
|                                 | Peak FPS – R | 9 | 2.7 (4.1)   | 7  | 1.7 (2.1)   | 1.0 (-2.7 to 4.6)    | 0.59 |
| 2 <sup>nd</sup> Dressing Change |              |   |             |    |             |                      |      |
|                                 | Pre-removal  | 5 | 0.00 (0.00) | 6  | 1.7 (4.1)   | -1.7 (-5.8 to 2.5)   | 0.39 |
|                                 | Post-removal | 6 | 0.7 (1.6)   | 5  | 2.0 (4.5)   | -1.3 (-5.7 to 3.1)   | 0.51 |
|                                 | Pre-silver   | 3 | 0.00 (0.00) | 3  | 1.3 (2.3)   | -1.3 (-5 to 2.4)     | 0.37 |
|                                 | Post-silver  | 3 | 0.00 (0.00) | 3  | 1.3 (2.3)   | -1.3 (-5 to 2.4)     | 0.37 |
|                                 | Peak FPS – R | 6 | 1.0 (1.7)   | 8  | 1.3 (3.5)   | -0.2 (-3.7 to 3.2)   | 0.88 |
| 3 <sup>rd</sup> Dressing Change |              |   |             |    |             |                      |      |
|                                 | Pre-removal  | 2 | 0.00 (0.00) | 3  | 3.3 (5.8)   | -3.3 (-17 to 10.4)   | 0.50 |
|                                 | Post-removal | 2 | 1.0 (1.4)   | 3  | 3.3 (5.8)   | -2.3 (-16.2 to 11.6) | 0.63 |
|                                 | Pre-silver   | 2 | 1.0 (1.4)   | 2  | 0.0 (0.0)   | 1.0 (-3.3 to 5.3)    | 0.42 |
|                                 | Post-silver  | 2 | 2.0 (2.8)   | 0  | -           | -                    | -    |
|                                 | Peak FPS – R | 2 | 3.0 (1.4)   | 3  | 3.3 (5.8)   | -0.3 (-14.2 to 13.6) | 0.94 |
| <b>Child: VAS</b>               |              |   |             |    |             |                      |      |
| 1 <sup>st</sup> Dressing Change |              |   |             |    |             |                      |      |
|                                 | Pre-removal  | 8 | 21.9 (27.5) | 7  | 7.1 (15.0)  | 15 (-11 to 40)       | 0.23 |
|                                 | Post-removal | 7 | 45.7 (41.6) | 5  | 8.0 (11.0)  | 38 (-5 to 81)        | 0.08 |
|                                 | Pre-silver   | 6 | 33.3 (37.8) | 4  | 30.0 (47.6) | 3 (-59 to 65)        | 0.90 |
|                                 | Post-silver  | 5 | 28.0 (25.9) | 4  | 25.0 (50.0) | 3 (-57 to 63)        | 0.91 |
|                                 | Peak VAS     | 8 | 52.5 (41.)  | 6  | 23.3 (40.8) | 29 (-19 to 77)       | 0.21 |
| 2 <sup>nd</sup> Dressing Change |              |   |             |    |             |                      |      |
|                                 | Pre-removal  | 8 | 16.3 (22.0) | 5  | 4.0 (8.9)   | 12 (-11 to 35)       | 0.27 |
|                                 | Post-removal | 7 | 27.9 (27.4) | 5  | 4.0 (8.9)   | 24 (-5 to 52)        | 0.09 |
|                                 | Pre-silver   | 5 | 16.0 (26.1) | 3  | 6.7 (11.5)  | 9 (-31 to 49)        | 0.59 |
|                                 | Post-silver  | 5 | 12.0 (17.9) | 3  | 0.0 (0.0)   | 12 (-14 to 38)       | 0.30 |
|                                 | Peak VAS     | 8 | 34.4 (31.3) | 7  | 5.7 (9.8)   | 29 (2 to 55)         | 0.04 |

3<sup>rd</sup> Dressing Change

|              |   |             |   |            |                 |        |
|--------------|---|-------------|---|------------|-----------------|--------|
| Pre-removal  | 3 | 8.3 (14.4)  | 2 | 0.0 (0.0)  | 8 (-26 – 43)    | 0.50   |
| Post-removal | 3 | 26.7 (25.2) | 2 | 15.0 (7.1) | 12 (-49 to 73)  | 0.58   |
| Pre-silver   | 2 | 5.0 (7.1)   | 2 | 5.0 (7.1)  | 0 (-30 to 30)   | > 0.99 |
| Post-silver  | 2 | 20.0 (28.3) | 2 | 0.0 (0.0)  | 20 (-66 to 106) | 0.42   |
| Peak VAS     | 2 | 40.0 (14.1) | 2 | 15.0 (7.1) | 25 (-23 to 73)  | 0.15   |

FLACC = face, legs, activity, cry, consolability scale; VAS = visual analogue scale; FPS-R = faces pain scale revises; SD = standard deviation; CI = confidence interval. \* Adjusted Mean Difference = Intervention Group – Control Group.

For peer review only

### Appendix C. Physiological measures at follow up dressing changes

| Measure                              | Time point                      | Intervention<br>Mean (SD)       | Control<br>Mean (SD)                   | Adjusted Mean<br>Difference (95% CI)   | <i>p</i> value        |      |
|--------------------------------------|---------------------------------|---------------------------------|----------------------------------------|----------------------------------------|-----------------------|------|
| Pulse rate<br>(beats/minute)         | 1 <sup>st</sup> Dressing Change |                                 |                                        |                                        |                       |      |
|                                      |                                 | Pre-removal                     | 104.1 (21.7)                           | 109.9 (19.0)                           | -6 (-17 to 5)         | 0.29 |
|                                      |                                 | Post-removal                    | 100.4 (23.6)                           | 104.9 (17.4)                           | -4 (-17 to 8)         | 0.47 |
|                                      |                                 | Pre-silver                      | 98.3 (25.8)                            | 104.9 (15.3)                           | -7 (-20 to 7)         | 0.33 |
|                                      |                                 | Post-silver                     | 99.3 (24.1)                            | 109.6 (19.68)                          | -10 (-24 – 3)         | 0.13 |
|                                      |                                 | 2 <sup>nd</sup> Dressing Change |                                        |                                        |                       |      |
|                                      |                                 | Pre-removal                     | 104.2 (21.4)                           | 119.1 (22.7)                           | -15 (-30 to 0)        | 0.05 |
|                                      |                                 | Post-removal                    | 100.9 (20.9)                           | 109.9 (23.0)                           | -9 (-25 to 7)         | 0.25 |
|                                      |                                 | Pre-silver                      | 95.7 (20.5)                            | 104.0 (20.6)                           | -8 (-29 to 12)        | 0.41 |
|                                      |                                 | Post-silver                     | 95.7 (21.5)                            | 104.3 (19.9)                           | -9 (-33 to 16)        | 0.45 |
|                                      |                                 | 3 <sup>rd</sup> Dressing Change |                                        |                                        |                       |      |
|                                      |                                 | Pre-removal                     | 108 (12.2)                             | 111.3 (27.8)                           | -3 (-33 to 16)        | 0.81 |
|                                      |                                 | Post-removal                    | 98.4 (19.9)                            | 103.9 (18.8)                           | -6 (-33 to 16)        | 0.60 |
|                                      |                                 | Pre-silver                      | 95.3 (24.2)                            | 94.8 (19.0)                            | 1 (-33 to 16)         | 0.97 |
|                                      |                                 | Post-silver                     | 96.3 (31.1)                            | 102.0 (28.3)                           | -9 (-33 to 16)        | 0.81 |
|                                      | Temperature<br>(° Celsius)      | 1 <sup>st</sup> Dressing Change |                                        |                                        |                       |      |
|                                      |                                 | Pre-removal                     | 36.1 (0.4)                             | 36.0 (0.4)                             | 0.05 (-0.17 to 0.26)  | 0.66 |
|                                      |                                 | Post-removal                    | 36.3 (0.6)                             | 36.2 (0.5)                             | 0.05 (-0.23 to 0.33)  | 0.71 |
|                                      |                                 | Pre-silver                      | 36.2 (0.4)                             | 36.2 (0.5)                             | -0.05 (-0.29 to 0.19) | 0.66 |
|                                      |                                 | Post-silver                     | 36.2 (0.4)                             | 36.3 (0.5)                             | -0.03 (-0.29 to 0.22) | 0.81 |
|                                      |                                 | 2 <sup>nd</sup> Dressing Change |                                        |                                        |                       |      |
|                                      |                                 | Pre-removal                     | 35.9 (0.4)                             | 35.9 (0.4)                             | 0.02 (-0.21 to 0.25)  | 0.85 |
|                                      |                                 | Post-removal                    | 36.2 (0.4)                             | 36.3 (0.5)                             | -0.08 (-0.35 to 0.25) | 0.57 |
|                                      |                                 | Pre-silver                      | 36.3 (0.4)                             | 36.3 (0.4)                             | -0.02 (-0.37 to 0.25) | 0.9  |
|                                      |                                 | Post-silver                     | 36.2 (0.4)                             | 36.3 (0.3)                             | -0.16 (-0.43 to 0.25) | 0.23 |
|                                      |                                 | 3 <sup>rd</sup> Dressing Change |                                        |                                        |                       |      |
|                                      |                                 | Pre-removal                     | 36.2 (0.9)                             | 36.1 (0.4)                             | 0.19 (-0.44 to 0.83)  | 0.53 |
|                                      |                                 | Post-removal                    | 36.6 (0.6)                             | 36.4 (0.3)                             | 0.18 (-0.27 to 0.63)  | 0.4  |
|                                      |                                 | Pre-silver                      | 36.8 (0.4)                             | 36.2 (0.3)                             | 0.52 (-0.02 to 1.06)  | 0.06 |
|                                      |                                 | Post-silver                     | 36.9 (0.5)                             | 36.4 (0.2)                             | 0.5 (-0.02 to 1.02)   | 0.06 |
| Salivary $\alpha$ -amylase<br>(U/mL) |                                 | 1 <sup>st</sup> Dressing Change |                                        |                                        |                       |      |
|                                      |                                 | Pre-removal                     | † Mean ( $\times$ /SD)<br>39 (24 – 70) | † Mean ( $\times$ /SD)<br>43 (23 – 65) | 1.00 (0.65 to 1.56)   | 0.97 |
|                                      |                                 | 2 <sup>nd</sup> Dressing Change |                                        |                                        |                       |      |
|                                      | Pre-removal                     | 43 (17 – 106)                   | 28 (14 – 77)                           | 1.14 (0.48 to 2.71)                    | 0.75                  |      |

1  
2  
3 SD = standard deviation; CI = confidence interval. U/mL = units per milliliter. \* Adjusted Mean Difference = Intervention

4  
5 Group – Control Group.  
6  
7  
8  
9  
10  
11  
12  
13  
14  
15  
16  
17  
18  
19  
20  
21  
22  
23  
24  
25  
26  
27  
28  
29  
30  
31  
32  
33  
34  
35  
36  
37  
38  
39  
40  
41  
42  
43  
44  
45  
46  
47  
48  
49  
50  
51  
52  
53  
54  
55  
56  
57  
58  
59  
60

For peer review only

### Appendix D. Pain score frequencies during acute care in the ED

| Pain Scale and Timepoint    | Pain Score | N (Intervention) | Burnaid® N (%) | N (Control)   | Plastic Wrap N (%) |
|-----------------------------|------------|------------------|----------------|---------------|--------------------|
| <b>FLACC (0 – 10 scale)</b> |            | <i>n</i> = 35    |                | <i>n</i> = 23 |                    |
| FLACC Pre-dressing          | 0          |                  | 18 (51%)       |               | 16 (70%)           |
|                             | 1          |                  | 9 (26%)        |               | 3 (13%)            |
|                             | 2          |                  | 4 (11%)        |               | 2 (9%)             |
|                             | 3          |                  | 1 (3%)         |               | 1 (4%)             |
|                             | 5          |                  | 1 (3%)         |               | 0 (0%)             |
|                             | 6          |                  | 1 (3%)         |               | 1 (4%)             |
|                             | 10         |                  | 1 (3%)         |               | 0 (0%)             |
| FLACC Post-dressing         |            | <i>n</i> = 36    |                | <i>n</i> = 35 |                    |
|                             | 0          |                  | 30 (83%)       |               | 26 (74%)           |
|                             | 1          |                  | 1 (3%)         |               | 5 (14%)            |
|                             | 2          |                  | 3 (8%)         |               | 4 (11%)            |
|                             | 3          |                  | 1 (3%)         |               | 0 (0%)             |
| FLACC Pre-Ag                |            | <i>n</i> = 36    |                | <i>n</i> = 34 |                    |
|                             | 0          |                  | 31 (86%)       |               | 24 (71%)           |
|                             | 1          |                  | 1 (3%)         |               | 5 (15%)            |
|                             | 2          |                  | 2 (6%)         |               | 4 (12%)            |
|                             | 3          |                  | 1 (3%)         |               | 0 (0%)             |
|                             | 6          |                  | 1 (3%)         |               | 0 (0%)             |
| FLACC Post-Ag               |            | <i>n</i> = 35    |                | <i>n</i> = 33 |                    |
|                             | 0          |                  | 26 (74%)       |               | 24 (73%)           |
|                             | 1          |                  | 2 (6%)         |               | 2 (6%)             |
|                             | 2          |                  | 3 (9%)         |               | 4 (12%)            |
|                             | 3          |                  | 1 (3%)         |               | 1 (3%)             |
|                             | 4          |                  | 2 (6%)         |               | 1 (3%)             |
|                             | 7          |                  | 0 (0%)         |               | 1 (3%)             |
| FLACC Peak                  |            | <i>n</i> = 36    |                | <i>n</i> = 34 |                    |
|                             | 0          |                  | 5 (14%)        |               | 4 (12%)            |
|                             | 1          |                  | 3 (8%)         |               | 4 (12%)            |
|                             | 2          |                  | 7 (19%)        |               | 3 (9%)             |
|                             | 3          |                  | 6 (17%)        |               | 4 (12%)            |

1  
2  
3  
4  
5  
6  
7  
8  
9  
10  
11  
12  
13  
14  
15  
16  
17  
18  
19  
20  
21  
22  
23  
24  
25  
26  
27  
28  
29  
30  
31  
32  
33  
34  
35  
36  
37  
38  
39  
40  
41  
42  
43  
44  
45  
46  
47  
48  
49  
50  
51  
52  
53  
54  
55  
56  
57  
58  
59  
60

|                                     |     |               |               |
|-------------------------------------|-----|---------------|---------------|
|                                     | 4   | 5 (14%)       | 7 (21%)       |
|                                     | 5   | 2 (6%)        | 2 (6%)        |
|                                     | 6   | 3 (8%)        | 4 (12%)       |
|                                     | 7   | 2 (6%)        | 1 (3%)        |
|                                     | 8   | 3 (8%)        | 3 (9%)        |
|                                     | 9   | 0 (0%)        | 1 (3%)        |
|                                     | 10  | 0 (0%)        | 1 (3%)        |
| <b>Observer VAS (0 – 100 scale)</b> |     | <i>n</i> = 34 | <i>n</i> = 22 |
| VAS Observer Pre-dressing           | 0   | 9 (26%)       | 4 (18%)       |
|                                     | 10  | 3 (9%)        | 3 (14%)       |
|                                     | 20  | 4 (12%)       | 1 (5%)        |
|                                     | 30  | 4 (12%)       | 3 (14%)       |
|                                     | 40  | 4 (12%)       | 6 (27%)       |
|                                     | 50  | 0 (0%)        | 4 (18%)       |
|                                     | 55  | 1 (3%)        | 0 (0%)        |
|                                     | 60  | 4 (12%)       | 0 (0%)        |
|                                     | 70  | 3 (9%)        | 0 (0%)        |
|                                     | 80  | 1 (3%)        | 1 (5%)        |
|                                     | 100 | 1 (3%)        | 0 (0%)        |
| VAS Observer Post-dressing          |     | <i>n</i> = 34 | <i>n</i> = 31 |
|                                     | 0   | 14 (41%)      | 10 (32%)      |
|                                     | 10  | 1 (3%)        | 3 (10%)       |
|                                     | 20  | 6 (18%)       | 5 (16%)       |
|                                     | 25  | 0 (0%)        | 1 (3%)        |
|                                     | 30  | 4 (12%)       | 5 (16%)       |
|                                     | 35  | 0 (0%)        | 1 (3%)        |
|                                     | 40  | 2 (6%)        | 2 (6%)        |
|                                     | 50  | 1 (3%)        | 2 (6%)        |
|                                     | 60  | 4 (12%)       | 2 (6%)        |
|                                     | 70  | 2 (6%)        | 0 (0%)        |
| VAS Observer Pre-Ag                 |     | <i>n</i> = 35 | <i>n</i> = 34 |
|                                     | 0   | 15 (43%)      | 14 (41%)      |
|                                     | 10  | 2 (6%)        | 7 (21%)       |
|                                     | 20  | 7 (20%)       | 4 (12%)       |
|                                     | 30  | 5 (14%)       | 3 (9%)        |
|                                     | 40  | 1 (3%)        | 1 (3%)        |
|                                     | 50  | 2 (6%)        | 2 (6%)        |
|                                     | 60  | 3 (9%)        | 1 (3%)        |

1  
2  
3  
4  
5  
6  
7  
8  
9  
10  
11  
12  
13  
14  
15  
16  
17  
18  
19  
20  
21  
22  
23  
24  
25  
26  
27  
28  
29  
30  
31  
32  
33  
34  
35  
36  
37  
38  
39  
40  
41  
42  
43  
44  
45  
46  
47  
48  
49  
50  
51  
52  
53  
54  
55  
56  
57  
58  
59  
60

|                               |     |               |          |               |
|-------------------------------|-----|---------------|----------|---------------|
|                               | 80  |               | 0 (0%)   | 1 (3%)        |
|                               | 100 |               | 0 (0%)   | 1 (3%)        |
| VAS Observer Post-Ag          |     | <i>n</i> = 33 |          | <i>n</i> = 32 |
|                               | 0   |               | 12 (36%) | 16 (50%)      |
|                               | 10  |               | 2 (6%)   | 4 (13%)       |
|                               | 20  |               | 6 (18%)  | 5 (16%)       |
|                               | 30  |               | 4 (12%)  | 0 (0%)        |
|                               | 40  |               | 1 (3%)   | 1 (3%)        |
|                               | 50  |               | 3 (9%)   | 2 (6%)        |
|                               | 60  |               | 4 (12%)  | 2 (6%)        |
|                               | 70  |               | 0 (0%)   | 1 (3%)        |
|                               | 100 |               | 1 (3%)   | 1 (3%)        |
| <b>FPS – R (0 – 10 scale)</b> |     | <i>n</i> = 9  |          | <i>n</i> = 7  |
| FPS – R Pre-application       | 0   |               | 4 (44%)  | 1 (14%)       |
|                               | 2   |               | 0 (0%)   | 2 (29%)       |
|                               | 4   |               | 3 (33%)  | 2 (29%)       |
|                               | 5   |               | 0 (0%)   | 1 (14%)       |
|                               | 8   |               | 1 (11%)  | 1 (14%)       |
|                               | 10  |               | 1 (11%)  | 0 (0%)        |
| FPS – R Post-application      |     | <i>n</i> = 10 |          | <i>n</i> = 9  |
|                               | 0   |               | 6 (60%)  | 4 (44%)       |
|                               | 2   |               | 1 (10%)  | 2 (22%)       |
|                               | 4   |               | 0 (0%)   | 1 (11%)       |
|                               | 6   |               | 1 (10%)  | 1 (11%)       |
|                               | 8   |               | 0 (0%)   | 1 (11%)       |
|                               | 10  |               | 2 (20%)  | 0 (0%)        |
| FPS – R Pre-Ag                |     | <i>n</i> = 11 |          | <i>n</i> = 11 |
|                               | 0   |               | 8 (73%)  | 9 (82%)       |
|                               | 1   |               | 1 (9%)   | 0 (0%)        |
|                               | 4   |               | 0 (0%)   | 1 (9%)        |
|                               | 6   |               | 1 (9%)   | 0 (0%)        |
|                               | 10  |               | 1 (9%)   | 1 (9%)        |
| FPS – R Post-Ag               |     | <i>n</i> = 10 |          | <i>n</i> = 10 |
|                               | 0   |               | 4 (40%)  | 5 (50%)       |
|                               | 1   |               | 1 (10%)  | 0 (0%)        |
|                               | 2   |               | 1 (10%)  | 2 (20%)       |
|                               | 4   |               | 1 (10%)  | 0 (0%)        |

|                                              |    |               |         |              |
|----------------------------------------------|----|---------------|---------|--------------|
|                                              | 6  |               | 2 (20%) | 1 (10%)      |
|                                              | 10 |               | 1 (10%) | 2 (20%)      |
| <b>Child Self-report VAS (0 – 100 scale)</b> |    | <i>n</i> = 9  |         | <i>n</i> = 2 |
| VAS Pre-application                          | 0  |               | 2 (22%) | 0 (0%)       |
|                                              | 10 |               | 0 (0%)  | 1 (50%)      |
|                                              | 20 |               | 1 (11%) | 0 (0%)       |
|                                              | 30 |               | 1 (11%) | 1 (50%)      |
|                                              | 40 |               | 1 (11%) | 0 (0%)       |
|                                              | 50 |               | 2 (22%) | 0 (0%)       |
|                                              | 70 |               | 1 (11%) | 0 (0%)       |
|                                              | 85 |               | 1 (11%) | 0 (0%)       |
| VAS Post-application                         |    | <i>n</i> = 10 |         | <i>n</i> = 4 |
|                                              | 0  |               | 4 (40%) | 1 (25%)      |
|                                              | 10 |               | 0 (0%)  | 1 (25%)      |
|                                              | 20 |               | 3 (30%) | 1 (25%)      |
|                                              | 30 |               | 1 (10%) | 0 (0%)       |
|                                              | 50 |               | 1 (10%) | 0 (0%)       |
|                                              | 60 |               | 1 (10%) | 0 (0%)       |
|                                              | 80 |               | 0 (0%)  | 1 (25%)      |
| VAS Pre-Ag                                   |    | <i>n</i> = 11 |         | <i>n</i> = 5 |
|                                              | 0  |               | 5 (45%) | 4 (80%)      |
|                                              | 10 |               | 1 (9%)  | 0 (0%)       |
|                                              | 20 |               | 3 (27%) | 0 (0%)       |
|                                              | 40 |               | 0 (0%)  | 1 (20%)      |
|                                              | 50 |               | 1 (9%)  | 0 (0%)       |
|                                              | 60 |               | 1 (9%)  | 0 (0%)       |
| VAS Post-Ag                                  |    | <i>n</i> = 7  |         | <i>n</i> = 4 |
|                                              | 0  |               | 2 (29%) | 2 (50%)      |
|                                              | 10 |               | 0 (0%)  | 1 (25%)      |
|                                              | 20 |               | 1 (14%) | 0 (0%)       |
|                                              | 40 |               | 2 (29%) | 0 (0%)       |
|                                              | 55 |               | 1 (14%) | 0 (0%)       |
|                                              | 60 |               | 1 (14%) | 0 (0%)       |
|                                              | 90 |               | 0 (0%)  | 1 (25%)      |

N = number of participants; FLACC = face, legs, activity, cry, consolability scale; VAS = visual analogue scale; FPS-R = faces pain scale revises; Ag = silver dressing.



# CONSORT Reporting Checklist for Randomised Trials

|                           | Reporting Item                                                                                                                                                                    | Page Number    |
|---------------------------|-----------------------------------------------------------------------------------------------------------------------------------------------------------------------------------|----------------|
| <b>Title and Abstract</b> |                                                                                                                                                                                   |                |
| Title                     | <a href="#">#1a</a> Identification as a randomized trial in the title.                                                                                                            | 0 (Title Page) |
| Abstract                  | <a href="#">#1b</a> Structured summary of trial design, methods, results, and conclusions                                                                                         | 1 - 2          |
| <b>Introduction</b>       |                                                                                                                                                                                   |                |
| Background and objectives | <a href="#">#2a</a> Scientific background and explanation of rationale                                                                                                            | 3 - 4          |
| Background and objectives | <a href="#">#2b</a> Specific objectives or hypothesis                                                                                                                             | 3 - 4          |
| <b>Methods</b>            |                                                                                                                                                                                   |                |
| Trial design              | <a href="#">#3a</a> Description of trial design (such as parallel, factorial) including allocation ratio.                                                                         | 4              |
| Trial design              | <a href="#">#3b</a> Important changes to methods after trial commencement (such as eligibility criteria), with reasons                                                            | 8              |
| Participants              | <a href="#">#4a</a> Eligibility criteria for participants                                                                                                                         | 5              |
| Participants              | <a href="#">#4b</a> Settings and locations where the data were collected                                                                                                          | 4              |
| Interventions             | <a href="#">#5</a> The experimental and control interventions for each group with sufficient details to allow replication, including how and when they were actually administered | 5 - 7          |
| Outcomes                  | <a href="#">#6a</a> Completely defined prespecified primary and secondary outcome measures, including how and when they were assessed                                             | 7 - 9          |
| Outcomes                  | <a href="#">#6b</a> Any changes to trial outcomes after the trial commenced, with reasons                                                                                         | NA             |
| Sample size               | <a href="#">#7a</a> How sample size was determined.                                                                                                                               | 9              |

|    |                          |                      |                                                                                     |         |
|----|--------------------------|----------------------|-------------------------------------------------------------------------------------|---------|
| 1  | Sample size              | <a href="#">#7b</a>  | When applicable, explanation of any interim analyses and stopping guidelines        | NA      |
| 2  |                          |                      |                                                                                     |         |
| 3  |                          |                      |                                                                                     |         |
| 4  |                          |                      |                                                                                     |         |
| 5  | Randomization -          | <a href="#">#8a</a>  | Method used to generate the random allocation sequence.                             | 5 - 6   |
| 6  | Sequence generation      |                      |                                                                                     |         |
| 7  |                          |                      |                                                                                     |         |
| 8  |                          |                      |                                                                                     |         |
| 9  | Randomization -          | <a href="#">#8b</a>  | Type of randomization; details of any restriction (such as blocking and block size) | NA      |
| 10 | Sequence generation      |                      |                                                                                     |         |
| 11 |                          |                      |                                                                                     |         |
| 12 |                          |                      |                                                                                     |         |
| 13 | Randomization -          | <a href="#">#9</a>   | Mechanism used to implement the random allocation                                   | 5 - 6   |
| 14 | Allocation concealment   |                      | sequence (such as sequentially numbered containers),                                |         |
| 15 | mechanism                |                      | describing any steps taken to conceal the sequence until                            |         |
| 16 |                          |                      | interventions were assigned                                                         |         |
| 17 |                          |                      |                                                                                     |         |
| 18 |                          |                      |                                                                                     |         |
| 19 |                          |                      |                                                                                     |         |
| 20 | Randomization -          | <a href="#">#10</a>  | Who generated the allocation sequence, who enrolled                                 | 5 - 6   |
| 21 | Implementation           |                      | participants, and who assigned participants to interventions                        |         |
| 22 |                          |                      |                                                                                     |         |
| 23 |                          |                      |                                                                                     |         |
| 24 | Blinding                 | <a href="#">#11a</a> | If done, who was blinded after assignment to interventions                          | 5 - 6   |
| 25 |                          |                      | (for example, participants, care providers, those assessing                         |         |
| 26 |                          |                      | outcomes) and how.                                                                  |         |
| 27 |                          |                      |                                                                                     |         |
| 28 |                          |                      |                                                                                     |         |
| 29 |                          |                      |                                                                                     |         |
| 30 | Blinding                 | <a href="#">#11b</a> | If relevant, description of the similarity of interventions                         | 3       |
| 31 |                          |                      |                                                                                     |         |
| 32 | Statistical methods      | <a href="#">#12a</a> | Statistical methods used to compare groups for primary and                          | 9 - 10  |
| 33 |                          |                      | secondary outcomes                                                                  |         |
| 34 |                          |                      |                                                                                     |         |
| 35 |                          |                      |                                                                                     |         |
| 36 | Statistical methods      | <a href="#">#12b</a> | Methods for additional analyses, such as subgroup analyses                          | 10      |
| 37 |                          |                      | and adjusted analyses                                                               |         |
| 38 |                          |                      |                                                                                     |         |
| 39 |                          |                      |                                                                                     |         |
| 40 | <b>Results</b>           |                      |                                                                                     |         |
| 41 |                          |                      |                                                                                     |         |
| 42 | Participant flow diagram | <a href="#">#13a</a> | For each group, the numbers of participants who were                                | 5       |
| 43 | (strongly recommended)   |                      | randomly assigned, received intended treatment, and were                            |         |
| 44 |                          |                      | analysed for the primary outcome                                                    |         |
| 45 |                          |                      |                                                                                     |         |
| 46 |                          |                      |                                                                                     |         |
| 47 |                          |                      |                                                                                     |         |
| 48 | Participant flow         | <a href="#">#13b</a> | For each group, losses and exclusions after randomization,                          | 5       |
| 49 |                          |                      | together with reason                                                                |         |
| 50 |                          |                      |                                                                                     |         |
| 51 |                          |                      |                                                                                     |         |
| 52 | Recruitment              | <a href="#">#14a</a> | Dates defining the periods of recruitment and follow-up                             | 4       |
| 53 |                          |                      |                                                                                     |         |
| 54 | Recruitment              | <a href="#">#14b</a> | Why the trial ended or was stopped                                                  | NA      |
| 55 |                          |                      |                                                                                     |         |
| 56 |                          |                      |                                                                                     |         |
| 57 | Baseline data            | <a href="#">#15</a>  | A table showing baseline demographic and clinical                                   | 11 - 13 |
| 58 |                          |                      | characteristics for each group                                                      |         |
| 59 |                          |                      |                                                                                     |         |
| 60 |                          |                      |                                                                                     |         |

|    |                          |                      |                                                                 |         |
|----|--------------------------|----------------------|-----------------------------------------------------------------|---------|
| 1  | Numbers analysed         | <a href="#">#16</a>  | For each group, number of participants (denominator)            | 11 - 18 |
| 2  |                          |                      | included in each analysis and whether the analysis was by       |         |
| 3  |                          |                      | original assigned groups                                        |         |
| 4  |                          |                      |                                                                 |         |
| 5  |                          |                      |                                                                 |         |
| 6  | Outcomes and estimation  | <a href="#">#17a</a> | For each primary and secondary outcome, results for each        | 14 – 18 |
| 7  |                          |                      | group, and the estimated effect size and its precision (such as |         |
| 8  |                          |                      | 95% confidence interval)                                        |         |
| 9  |                          |                      |                                                                 |         |
| 10 |                          |                      |                                                                 |         |
| 11 |                          |                      |                                                                 |         |
| 12 | Outcomes and estimation  | <a href="#">#17b</a> | For binary outcomes, presentation of both absolute and          | NA      |
| 13 |                          |                      | relative effect sizes is recommended                            |         |
| 14 |                          |                      |                                                                 |         |
| 15 |                          |                      |                                                                 |         |
| 16 | Ancillary analyses       | <a href="#">#18</a>  | Results of any other analyses performed, including subgroup     | 15 - 18 |
| 17 |                          |                      | analyses and adjusted analyses, distinguishing pre-specified    |         |
| 18 |                          |                      | from exploratory                                                |         |
| 19 |                          |                      |                                                                 |         |
| 20 |                          |                      |                                                                 |         |
| 21 | Harms                    | <a href="#">#19</a>  | All important harms or unintended effects in each group (For    | 13      |
| 22 |                          |                      | specific guidance see CONSORT for harms)                        |         |
| 23 |                          |                      |                                                                 |         |
| 24 |                          |                      |                                                                 |         |
| 25 |                          |                      |                                                                 |         |
| 26 | <b>Discussion</b>        |                      |                                                                 |         |
| 27 |                          |                      |                                                                 |         |
| 28 | Limitations              | <a href="#">#20</a>  | Trial limitations, addressing sources of potential bias,        | 19      |
| 29 |                          |                      | imprecision, and, if relevant, multiplicity of analyses         |         |
| 30 |                          |                      |                                                                 |         |
| 31 |                          |                      |                                                                 |         |
| 32 | Interpretation           | <a href="#">#22</a>  | Interpretation consistent with results, balancing benefits and  | 19 – 20 |
| 33 |                          |                      | harms, and considering other relevant evidence                  |         |
| 34 |                          |                      |                                                                 |         |
| 35 |                          |                      |                                                                 |         |
| 36 | Registration             | <a href="#">#23</a>  | Registration number and name of trial registry                  | 4       |
| 37 |                          |                      |                                                                 |         |
| 38 |                          |                      |                                                                 |         |
| 39 | <b>Other Information</b> |                      |                                                                 |         |
| 40 |                          |                      |                                                                 |         |
| 41 | Protocol                 | <a href="#">#24</a>  | Where the full trial protocol can be accessed, if available     | 4       |
| 42 |                          |                      |                                                                 |         |
| 43 | Funding                  | <a href="#">#25</a>  | Sources of funding and other support (such as supply of         | 24      |
| 44 |                          |                      | drugs), role of funders                                         |         |
| 45 |                          |                      |                                                                 |         |
| 46 |                          |                      |                                                                 |         |

47 Based on the CONSORT guidelines

48  
49 Schulz KF, Altman DG, Moher D, for the CONSORT Group. CONSORT 2010 Statement: updated guidelines for  
50 reporting parallel group randomised trials  
51  
52  
53  
54  
55  
56  
57  
58  
59  
60

# BMJ Open

## Effectiveness of a hydrogel dressing as an analgesic adjunct to first aid for the treatment of acute paediatric burn injuries: A prospective randomised controlled trial

|                                 |                                                                                                                                                                                                                                                                                                                                                                                                                                                                                                                                                                                                                                      |
|---------------------------------|--------------------------------------------------------------------------------------------------------------------------------------------------------------------------------------------------------------------------------------------------------------------------------------------------------------------------------------------------------------------------------------------------------------------------------------------------------------------------------------------------------------------------------------------------------------------------------------------------------------------------------------|
| Journal:                        | <i>BMJ Open</i>                                                                                                                                                                                                                                                                                                                                                                                                                                                                                                                                                                                                                      |
| Manuscript ID                   | bmjopen-2020-039981.R1                                                                                                                                                                                                                                                                                                                                                                                                                                                                                                                                                                                                               |
| Article Type:                   | Original research                                                                                                                                                                                                                                                                                                                                                                                                                                                                                                                                                                                                                    |
| Date Submitted by the Author:   | 23-Sep-2020                                                                                                                                                                                                                                                                                                                                                                                                                                                                                                                                                                                                                          |
| Complete List of Authors:       | Holbert, Maleea; Queensland Health Centre for Children's Health Research, Centre for Children's Burns and Trauma Research; The University of Queensland Faculty of Medicine<br>Kimble, Roy; Queensland Health Centre for Children's Health Research, Centre for Children's Burns and Trauma Research; The University of Queensland Faculty of Medicine<br>Chatfield, Mark; The University of Queensland Faculty of Medicine<br>Griffin , Bronwyn; Queensland Health Centre for Children's Health Research, Centre for Children's Burns and Trauma Research; Queensland University of Technology Faculty of Health, School of Nursing |
| <b>Primary Subject Heading</b>: | Paediatrics                                                                                                                                                                                                                                                                                                                                                                                                                                                                                                                                                                                                                          |
| Secondary Subject Heading:      | Emergency medicine, Anaesthesia                                                                                                                                                                                                                                                                                                                                                                                                                                                                                                                                                                                                      |
| Keywords:                       | PAEDIATRICS, PAIN MANAGEMENT, ACCIDENT & EMERGENCY MEDICINE, WOUND MANAGEMENT                                                                                                                                                                                                                                                                                                                                                                                                                                                                                                                                                        |
|                                 |                                                                                                                                                                                                                                                                                                                                                                                                                                                                                                                                                                                                                                      |

SCHOLARONE™  
Manuscripts



I, the Submitting Author has the right to grant and does grant on behalf of all authors of the Work (as defined in the below author licence), an exclusive licence and/or a non-exclusive licence for contributions from authors who are: i) UK Crown employees; ii) where BMJ has agreed a CC-BY licence shall apply, and/or iii) in accordance with the terms applicable for US Federal Government officers or employees acting as part of their official duties; on a worldwide, perpetual, irrevocable, royalty-free basis to BMJ Publishing Group Ltd ("BMJ") its licensees and where the relevant Journal is co-owned by BMJ to the co-owners of the Journal, to publish the Work in this journal and any other BMJ products and to exploit all rights, as set out in our [licence](#).

The Submitting Author accepts and understands that any supply made under these terms is made by BMJ to the Submitting Author unless you are acting as an employee on behalf of your employer or a postgraduate student of an affiliated institution which is paying any applicable article publishing charge ("APC") for Open Access articles. Where the Submitting Author wishes to make the Work available on an Open Access basis (and intends to pay the relevant APC), the terms of reuse of such Open Access shall be governed by a Creative Commons licence – details of these licences and which [Creative Commons](#) licence will apply to this Work are set out in our licence referred to above.

Other than as permitted in any relevant BMJ Author's Self Archiving Policies, I confirm this Work has not been accepted for publication elsewhere, is not being considered for publication elsewhere and does not duplicate material already published. I confirm all authors consent to publication of this Work and authorise the granting of this licence.

**Title**

Effectiveness of a hydrogel dressing as an analgesic adjunct to first aid for the treatment of acute paediatric burn injuries: A prospective randomised controlled trial

**Authors**

Maleea D. Holbert<sup>1,2,3</sup>, Roy M. Kimble<sup>1,2,3,4</sup>, Mark D. Chatfield<sup>3</sup>, Bronwyn R. Griffin<sup>1,2,4,5</sup>

**Affiliations**

<sup>1</sup> Centre for Children's Burns and Trauma Research, Centre for Children's Health Research, South Brisbane, Queensland, Australia 4101

<sup>2</sup> Pegg Leditschke Paediatric Burns Centre, The Queensland Children's Hospital, South Brisbane, Queensland, Australia 4101

<sup>3</sup> Faculty of Medicine, The University of Queensland, Brisbane, Queensland, Australia 4072

<sup>4</sup> Faculty of Health, School of Nursing, Queensland University of Technology, Brisbane, Queensland, Australia 4059

<sup>5</sup> Institute of Health and Biomedical Innovation, Queensland University of Technology, Brisbane, Queensland, Australia 4059

**Corresponding author:**

Maleea D. Holbert: [m.holbert@uq.edu.au](mailto:m.holbert@uq.edu.au)

Centre for Children's Burns and Trauma Research, Level 7 Centre for Children's Health Research, 62 Graham Street, South Brisbane, QLD 4101, Australia.

Telephone: +61 3069 7433

**Co-authors' email addresses**

Roy Kimble: [royk@uq.edu.au](mailto:royk@uq.edu.au)

Mark Chatfield: [m.chatfield@uq.edu.au](mailto:m.chatfield@uq.edu.au)

Bronwyn Griffin: [b.griffin@uq.edu.au](mailto:b.griffin@uq.edu.au)

## Abstract

### *Objective*

To compare the effectiveness of two acute burn dressings, Burnaid® hydrogel dressing and plasticised polyvinylchloride film, on reducing acute pain scores in paediatric burn patients following appropriate first aid.

### *Design*

Single-centre, superiority, two-arm, parallel-group, prospective randomised controlled trial.

### *Participants and Setting*

Paediatric patients (aged  $\leq 16$ ) presenting to the Emergency Department at the Queensland Children's Hospital, Brisbane, Australia, with an acute thermal burn were approached for participation in the trial from September 2017 – September 2018.

### *Interventions*

Patients were randomised to receive either (1) Burnaid® hydrogel dressing (Intervention) or (2) plasticised polyvinylchloride film (Control) as an acute burn dressing.

### *Primary and Secondary Outcomes*

Observational pain scores from nursing staff assessed 5-minutes post-application of the randomised dressing, measured using the Face Legs Activity Cry and Consolability Scale was the primary outcome. Repeated measures of pain, stress, and re-epithelialisation were also collected at follow-up dressing changes until 95% wound re-epithelialisation occurred.

### *Results*

Seventy-two children were recruited and randomised ( $n = 37$  Intervention;  $n = 35$  Control). No significant between-group differences in nursing (Mean Difference:  $-0.1$ , 95% CI:  $-0.7$  to  $0.5$ ,  $p = 0.72$ ) or caregiver (MD:  $1$ , 95% CI:  $-8$  to  $11$ ,  $p = 0.78$ ) observational pain scores were identified. Moreover, no significant differences in child self-report pain (MD:  $0.3$ , 95% CI:  $-1.7$  to  $2.2$ ,  $p = 0.78$ ), heart rate (MD:  $-3$ , 95% CI:  $-11$  to  $5$ ,  $p = 0.41$ ), temperature, (MD:  $0.6$ , 95% CI:  $-0.13$  to  $0.24$ ,  $p = 0.53$ ), stress (Geometric Mean Ratio:  $1.53$ , 95% CI:  $0.93$  to  $2.53$ ,  $p = 0.10$ ), or re-epithelialisation rates (MD:  $-1$ , 95% CI:  $-3$  to  $1$ ,  $p = 0.26$ ) were identified between the two groups.

## Conclusions

A clear benefit of Burnaid® hydrogel dressing as an analgesic adjunct to first aid for the treatment of acute paediatric burns was not identified in this investigation.

## Trial Registration

Australia and New Zealand Clinical Trials Register (ACTRN): ACTRN12617001274369

## Article Summary

### *Strengths and limitations of this study*

- First randomised controlled trial investigating analgesic properties of acute burn dressings in a paediatric burn population
- Pain was assessed using age-specific and reliable self-report and observational scales, in addition to physiological measures of pain and distress.
- This investigation was pragmatic in nature, replicating real-world clinical scenarios where acute burn dressings are used.
- Lack of representativeness within the patient sample (small to medium sized burns in children aged between 0 – 5 years) may limit generalisability of the findings to the broader paediatric burn population.

### *Key Words*

Burns, Paediatric Emergency Medicine, Randomised Controlled Trial, Pain



## 1. Introduction

Pain remains a major issue following a burn, and research suggests that pain from burn injuries continues to be undertreated in children [1]. The subsequent wound care required to treat a burn is also associated with significant pain and distress – thus burn pain comprises a challenging spectrum of acute, background, breakthrough, and procedural pain [2, 3]. The aim of this trial was to provide health practitioners with evidence to support the use of an acute burn dressing that is superior in terms of pain relief for paediatric patients with acute thermal burn injuries. Optimising pain management for paediatric burn patients is more than just a compassionate need to reduce suffering – despite that being a sufficient motivator for health care professionals. Improving acute pain control for children with traumatic injuries such as a burn is critical, as suboptimal analgesia can prolong wound re-epithelialisation [4, 5]. Moreover, adverse and uncontrolled pain can have long-term emotional consequences [6, 7] and influence pain perception and processing later in life [8, 9].

Topical administration of cool running water (CRW) for 20 minutes within 3 hours of the burn occurring is the recommended gold standard first aid for burn injuries, in accordance with the Australian and New Zealand Burn Association [10-14]. Following first aid, guidelines recommend burn wounds to be covered with a sterile dressing to maintain a moist wound environment, minimise the risk of infection, and prevent air exposure – as this can be quite painful for patients with acute burns [15]. Characteristics of an ideal acute burn dressing include a transparent non-adherent design, easy application and removal, and protection from environmental exposure. Plasticised polyvinylchloride (PVC) film fulfils this criteria, and excluding the application to facial burns, is an inexpensive and practical dressing for acute burn injuries in the prehospital and Emergency Department (ED) setting. For this reason, PVC film has been used in the management of acute burns for over four decades. However, the preferred acute burn dressing varies between prehospital services in different states and countries.

Over the past decade, Burnaid® hydrogel dressings have gained widespread use in the prehospital setting for acute burn injuries – and are promoted as providing hydration to the burn wound and pain relief via a convection and evaporative cooling effect [16]. Burnaid® dressings comprise of a 3mm thick sterile polyester urethane foam pad impregnated with a propylene glycol gel, which contains more than 90% purified water. Despite its popularity amongst prehospital services, there is limited empirical evidence for the effectiveness

1  
2 of hydrogel burn dressings, and no studies have been conducted in a paediatric burn population. At present,  
3  
4 there is no robust empirical evidence to support the adoption of one particular acute burn dressing over the  
5  
6 others. With the continual development of expensive wound care products, it is important that we validate  
7  
8 their use and effectiveness within the targeted clinical population. This trial examined the effectiveness of  
9  
10 Burnaid® hydrogel dressings as an analgesic adjunct to first aid for the treatment of acute paediatric burns in  
11  
12 comparison to current standard practice – PVC film.  
13  
14

## 15 **2. Methods**

### 16 *2.1 Design and setting*

17  
18 We conducted a prospective, single-centre, superiority, randomised controlled trial (RCT) examining the  
19  
20 effectiveness of a hydrogel dressing as an analgesic adjunct to first aid for the treatment of acute paediatric  
21  
22 burn injuries, compared to current standard care. We used a two-arm parallel design with a 1:1 allocation  
23  
24 ratio. Participants were recruited between September 2017 – September 2018 from the ED and the Pegg  
25  
26 Leditschke Children’s Burns Outpatient Department (OPD) at the Queensland Children’s Hospital (QCH)  
27  
28 following initial presentation for their burn. The QCH serves as the major burns referral centre for  
29  
30 Queensland and Northern New South Wales, treating over 1200 paediatric patients with burn injuries per  
31  
32 annum.  
33  
34  
35

### 36 *2.2 Patient and public involvement*

37  
38 Patients and/or the public were not involved in the development of this research. However, relevant  
39  
40 stakeholders and knowledge users (i.e. prehospital staff, clinicians, and nurses) were involved in the initial  
41  
42 development of the trial, refinement of research questions, and identification of current knowledge gaps.  
43  
44  
45

### 46 *2.3 Protocol and registration*

47  
48 This trial received ethics approval from The Queensland Children’s Health Service Human Research Ethics  
49  
50 Committee (approval number: HREC/16/QRCH/322) and The University of Queensland Ethics Committee  
51  
52 (clearance number: 2017000979). Study methodology was documented in a published protocol [17] and  
53  
54 registered with the Australian New Zealand Clinical Trials Registry (ID number: ACTRN12617001274369)  
55  
56 on the 5<sup>th</sup> September 2017 prior to recruitment. This trial was completed as per the published protocol [17],  
57  
58 which contains a more in-depth description of the trial’s design and methods.  
59  
60

## 2.4 Participants

### 2.4.1 Inclusion criteria

Inclusion criteria: children aged between 0 – 16 years with an acute thermal burn < 20% of the child's total body surface area (TBSA), presented to the ED or Burns OPD within 24 hours of sustaining the burn, received optimal first aid, and no silver dressings or silver sulphadiazine cream applied prior to enrolment.

### 2.4.2 Exclusion criteria

Exclusion criteria included: children with non-thermal burns or inhalation injuries, presented to the QCH more than 24-hours post-burn, inadequate first aid, prior treatment with silver wound products, non-English speaking, cognitive impairments, required ventilation or initial debridement under general anaesthetic, current involvement with Department of Communities, known sensitivity to hydrogels, and patients with comorbidities that could impair wound healing or exacerbate/alter pain (i.e. metabolic congenital disorders, spinal cord defects/injuries, insensate patients).

**[INSERT Figure 1. CONSORT Flow Diagram]**

## 2.5 Procedures

Participant enrolment and intervention allocation are described above in *Figure 1*. All participants (if age appropriate) and caregivers were given verbal and written information about the research, and provided signed consent to participate in the trial. After obtaining informed consent, participants were stratified by pain risk (1. High Pain or 2. Low Pain) according to factors that could influence pain in paediatric burn patients. Factors were based on findings from a retrospective review of data from the Queensland Paediatric Burns Registry (unpublished hospital quality review). Participants presenting to the ED or Burns OPD with one or more of the following criteria were considered at high pain risk: unilateral or bilateral foot burns, campfire/hot coal burns, circumferential burn injuries, and burns >5% TBSA. Following stratification, patients were randomised to receive either (1) Burnaid® hydrogel dressing (Intervention) or (2) PVC film (Control). A computerised random number sequence-generating program was used for participant randomisation. Concealment of treatment allocation were performed via the use of sealed, opaque, identical, consecutively numbered envelopes prepared in advance by an independent third-party.

1  
2 Due to the pragmatic nature of this trial, researchers could not be blinded to which randomised dressing  
3 patients received. Researchers were required to be present when the acute burn dressings were applied and  
4 removed to obtain pain scores and additional outcome measures from the child, caregiver, and medical staff.  
5  
6 Treating clinicians, nursing staff, patients, and caregivers were also not blinded to which treatment  
7  
8 participants received as dressings were visible on the patient's burn. Because these dressings are topical,  
9  
10 concealment during patient treatment in the ED was not possible. To include an element of blinding in the  
11  
12 trial, a specialist panel of burn surgeons and senior nurses performed a blinded review of 3D wound images  
13  
14 to determine rate of re-epithelialisation at each dressing change until > 95% burn re-epithelialisation  
15  
16 occurred.  
17  
18  
19

20  
21  
22 **[INSERT Figure 2. Pain assessment timepoints during acute and follow up care]**  
23

24  
25 Pain was assessed in the ED (*Figure 2A*) at four timepoints relative to the child's acute treatment for their  
26 burn: (T1) Pre-randomised dressing application, (T2) Post-randomised dressing application, (T3) Pre-silver  
27 dressing application, and (T4) Post-silver dressing application. Peak pain during wound cleaning and  
28 debridement was also collected from nursing staff using the FLACC, aiming to capture the worst/maximal  
29 pain experienced during acute treatment. During subsequent dressing changes in the Burns OPD (*Figure 2B*),  
30 pain was assessed at four time points relative to the child's follow up treatment: (T1) Pre-silver-dressing  
31 removal, (T2) Post-silver dressing removal, (T3) Pre-silver dressing application, (T4) Post-silver dressing  
32 application. Peak pain during wound cleaning was also documented during dressing changes. Observational  
33 pain scores from ED nursing staff assessed post-application of the randomised dressings (T2 in *Figure 2A*)  
34 was the primary outcome measure of the trial. Pain at T2 was assessed five minutes after the application of  
35 the randomised dressings for all participants – to give the dressings a standard period of time on the wound  
36 before pain assessment.  
37  
38  
39  
40  
41  
42  
43  
44  
45  
46  
47  
48  
49

50  
51 Additional measures collected at each of the eight aforementioned timepoints during the child's acute and  
52 follow up care included: a saliva sample (to measure biomarkers of stress), heart rate, and temperature. The  
53 duration of each burn care procedure was timed in the ED and Burns OPD. Information regarding analgesic  
54 medication administered to the patient prior to enrolment in the trial was obtained from Ambulance chart  
55 records and referral notes. All medication administered to patients following presentation to the QCH was  
56  
57  
58  
59  
60

1  
2 recorded, in addition to all non-pharmacological interventions such as distraction techniques, rewards,  
3  
4 procedural preparation, and music/behavioural therapies.  
5

## 6 7 2.6 Interventions

### 8 9 10 2.6.1 Intervention – Burnaid® hydrogel dressing

11 Burnaid® hydrogel dressing (Mundicare®, Sydney, Australia) served as the treatment intervention in this trial.  
12  
13 Burnaid® products previously contained *Melaleuca Alternifolia* (tea tree) for its broad-spectrum antimicrobial  
14  
15 properties, however inclusion of this active ingredient has since ceased and no tea tree containing Burnaid®  
16  
17 products were used in this investigation.  
18  
19

### 20 21 2.6.2 Control – Plasticised polyvinylchloride film

22  
23 Plasticised PVC film (also known as plastic wrap, cling film, and Saran™ wrap) is a thin (< 25µm) food-  
24  
25 wrap that has been used in the management of acute burn injuries for over four decades [18, 19].  
26  
27

## 28 29 2.7 Measurements

### 30 31 2.7.1 Primary outcome measure

32  
33 Observational pain scores from ED nursing staff was the primary outcome measure of the trial, and was  
34  
35 assessed using the Face, Legs, Activity, Cry and Consolability (FLACC) scale. The FLACC scale is a five-  
36  
37 item composite tool measuring aspects of both pain and distress in children. The scale consists of five  
38  
39 categories of behaviour, each of which are scored on a 0 to 2-point scale, giving a total score ranging from 0  
40  
41 to 10 [20]. The FLACC has been described in the literature as a reliable and well-validated pain assessment  
42  
43 tool for postoperative pain in patients age between 0 – 7, and has shown correlations with child self-report  
44  
45 pain measures [21, 22].  
46  
47

### 48 49 2.7.2 Additional Measures of Pain

#### 50 51 2.7.2.1 Child self-report (ages 4 – 8 years)

52  
53 Child self-report pain scores were assessed using the Faces Pain Scale – Revised (FPS – R). The FPS – R is a  
54  
55 linear self-report scale designed for pain assessment in children over the age of four [23, 24]. The item is  
56  
57 composed of six-points (six-faces with differing expressions) with a lower anchor of *no pain* and an upper  
58  
59 anchor of *very much pain*.  
60

### 2.7.2.2 *Child self-report (ages 8+)*

For patients over the age of eight, self-report pain was assessed using the Visual Analogue Scale for Pain (VAS). The VAS has been described in the literature as a reliable and well-validated pain assessment tool for use in older children [25, 26].

### 2.7.2.3 *Parent (observational) report*

Parent/caregiver observational pain scores were assessed using the Observer Visual Analogue Scale for Pain (VAS Observer) for pre-verbal paediatric patients and those under the age of four. The VAS Observer has been shown to be a reliable and valid observational pain scale for use in a non-verbal paediatric population, and for children who are unable to self-report their pain [27].

## 2.7.3 Secondary outcome measures

### 2.7.3.1 *Re-epithelialisation*

Burns were considered re-epithelialised if  $\geq 95\%$  of the original wound area had re-epithelialised, and the patient no longer required silver dressings. Wound re-epithelialisation was assessed using two methods. First, clinical judgement from the treating surgical consultant was determined at each dressing change. Second, a panel of paediatric burn specialists performed a blinded review of 3D images (3D LifeViz™ System; QuantifiCare, Valbonne, France) of patient's burn wounds taken at each dressing change.

### 2.7.3.2 *Stress*

Stress was assessed in this trial using  $\alpha$ -amylase – a biochemical stress marker produced locally within salivary glands. Patients placed a SalivaBio Oral Swab™ (Salimetrics Europe Ltd., Newmarket, UK) under their tongue for 2 minutes for saliva collection. Salivary Alpha-Amylase Kinetic Enzyme Assay Kits (Item No. 1-1902, Salimetrics Inc) were used to quantify  $\alpha$ -amylase, as per the manufacturer's instructions. The trial protocol included assessments of levels of  $\alpha$ -amylase and cortisol as indicators of stress during burn wound treatment in the ED and subsequent dressing changes. Salivary  $\alpha$ -amylase (sAA) was selected over cortisol based on previous research conducted at the Pegg Leditschke Paediatric Burns OPD [28]. This research found sAA to be responsive to stress during wound care procedures, and also found an association between sAA and pain in children with thermal burns during dressing changes. Moreover, follow up appointments occur during a morning clinic which runs from 7.30am – 10am. Cortisol levels are known to peak within 30 – 45 minutes of waking up and then decrease due to diurnal variation. Due to the timing of

1  
2 sample collection, sAA was deemed to be a more appropriate measure of stress in this trial. Saliva samples  
3  
4 were analysed from the following timepoints:

- 5  
6 1. Pre- and post-application of the randomised dressing (i.e. Burnaid® or PVC film)
- 7  
8 2. Following patient arrival in the Burns OPD for their first dressing change – prior to premedication  
9  
10 and silver dressing removal
- 11  
12 3. Following patient arrival in the Burns OPD for their second dressing change – prior to premedication  
13  
14 and silver dressing removal  
15  
16

### 17 18 *2.7.3.3. Staff and caregiver perspectives on dressings*

19  
20 Dressing satisfaction from clinical staff regarding ease of randomised dressing application, ease of removal,  
21  
22 flexibility, and conformity were rated using a self-report 0 – 10 Numeric Rating Scale (NRS) for both  
23  
24 Burnaid® dressings and PVC film from ED nursing staff. Parent/caregiver ratings on ease of dressing  
25  
26 application, removal, comfort, and ease of movement were also assessed using a 0 – 10 NRS. It is  
27  
28 acknowledged that ease of dressing measurements within the ED were confounded due to lack of blinding,  
29  
30 and as a result of the variable nature, size, and anatomical location of the areas to be dressed.  
31  
32

### 33 34 *2.7.3.4 Demographic and clinical information*

35  
36 Demographic and clinical details were obtained from parents/caregivers and medical records including age,  
37  
38 sex, burn mechanism, area affected, estimated burn TBSA, and prehospital care (such as first aid and  
39  
40 pharmacological interventions). Treating surgical staff first assessed burn TBSA in the ED following wound  
41  
42 debridement using a modified version of the Lund and Browder chart [29]. Burn TBSA was also assessed at  
43  
44 each change of dressing from the child's treating consultant until the burns were considered to be 95% re-  
45  
46 epithelialised. Burn depth was assessed using two methods in the trial. First, clinical judgment from the  
47  
48 treating surgical consultant was reported following initial patient presentation to the hospital, and at each  
49  
50 follow up appointment in the Burns OPD for dressing changes. Second, burn depth was assessed using rapid  
51  
52 imaging with Moor LDLS-BI™ Laser Doppler Imager (Moor Instruments Limited, Devon, United  
53  
54 Kingdom). Laser Doppler Imaging (LDI) is a non-contact technique used in the assessment of burn injuries  
55  
56 to measure skin blood perfusion at the surface of the burn wound [30]. LDI measures the extent of micro-  
57  
58 vessel blood flow within the whole burn area, providing information on burn depth via microcirculation  
59  
60



1  
2 expressed as “perfusion units” (PU) [31, 32]. Participants had their burn wounds scanned using LDI on their  
3  
4 first change of dressing (72 – 120 hours post-burn) in the Burns Outpatient Department to obtain mean and  
5  
6 minimum PU. This time period for LDI is in accordance with the manufactures instructions, and has been  
7  
8 established as acceptable time frame in recent studies [33, 34].  
9

## 10 11 *2.8 Statistical Analysis*

12  
13 In accordance with previous studies aiming to reduce pain in paediatric burn patients, we expected pain  
14  
15 scores within each treatment group to have a normal distribution and a standard deviation (SD) of 2.4 [35].  
16  
17 Data were analysed on an intent-to-treat basis. Sample size was estimated at 29 experimental (intervention)  
18  
19 participants and 29 control participants to detect a significant between-group difference of 1.8 in pain scores  
20  
21 post-dressing application. With power equal to 0.8,  $\alpha$  set at 0.05, and up to a potential 20% loss to follow-up,  
22  
23 the calculated target sample size was 72 participants. Between-group differences in primary and secondary  
24  
25 outcomes were estimated using mixed models in Stata version 16 [36]. Random effects for patients  
26  
27 accounted for the repeated measures, and restricted maximum likelihood method with Kenward-Rogers  
28  
29 degrees of freedom was used. Each model included data at baseline (i.e. pre-dressing) and at one follow-up  
30  
31 time, and assumed no population differences at baseline, a change from baseline in the control group and a  
32  
33 different change from baseline in the intervention group. Adjusted mean differences (Intervention - Control)  
34  
35 and 95% confidence intervals (CIs) are reported. The sAA data was log-transformed, and the adjusted ratio  
36  
37 of geometric means (Intervention  $\div$  Control) are reported [37].  
38  
39  
40

## 41 **3. Results**

### 42 43 *3.1 Sample and demographic characteristics*

44  
45 Seventy-two paediatric burn patients were randomised and recruited into the trial. Four participants were lost  
46  
47 to follow up and had no additional data collected past the initial point of treatment in the ED. Patient  
48  
49 demographic details and baseline characteristics are presented in *Table 1*.  
50  
51  
52  
53  
54  
55  
56  
57  
58  
59  
60



**Table 1.** Participant demographic and clinical variables

| Variable                       | Intervention<br>N = 37 | Control<br>N = 35 |
|--------------------------------|------------------------|-------------------|
| Patient age (years)            |                        |                   |
| 0 – 3                          | 20 (54%)               | 27 (77%)          |
| 4 – 7                          | 9 (24%)                | 5 (14%)           |
| 8 – 16                         | 8 (22%)                | 3 (9%)            |
| Indigenous status              |                        |                   |
| Not indigenous                 | 34 (92%)               | 33 (94%)          |
| Aboriginal                     | 2 (5%)                 | 2 (6%)            |
| Torres Strait Islander         | 1 (3%)                 | 0 (0%)            |
| Gender                         |                        |                   |
| Male                           | 22 (59%)               | 19 (54%)          |
| Mechanism of injury            |                        |                   |
| Scald                          | 26 (70%)               | 28 (80%)          |
| Contact                        | 8 (22%)                | 7 (20%)           |
| Flame                          | 2 (5%)                 | 0 (0%)            |
| Flash                          | 1 (3%)                 | 0 (0%)            |
| Burn source                    |                        |                   |
| Hot beverage                   | 10 (27%)               | 14 (40%)          |
| Water from kettle/saucepan/tap | 7 (19%)                | 10 (29%)          |
| Noodles                        | 7 (19%)                | 3 (9%)            |
| Food (other)                   | 1 (3%)                 | 1 (3%)            |
| Stove/oven/barbeque            | 4 (11%)                | 3 (9%)            |
| Lighter                        | 2 (5%)                 | 0 (0%)            |
| Hair straightener/curling iron | 1 (3%)                 | 2 (6%)            |
| Fireplace/sun heated metal     | 2 (5%)                 | 2 (6%)            |
| Hot oil/wax                    | 2 (5%)                 | 0 (0%)            |
| Aerosol can explosion          | 1 (3%)                 | 0 (0%)            |
| Burn TBSA percentage           | 2 (1 - 4)              | 2 (1 - 4)         |
| Burn depth                     |                        |                   |
| Superficial partial thickness  | 30 (81%)               | 24 (69%)          |
| Deep dermal partial thickness  | 7 (19%)                | 11 (31%)          |
| Burn wound perfusion           |                        |                   |
|                                | † N = 48               | † N = 43          |
| LDI Mean PU                    | 696 (293)              | 679 (276)         |
| LDI Minimum PU                 | 144 (143)              | 110 (104)         |

1  
2  
3  
4  
5  
6  
7  
8  
9  
10  
11  
12  
13  
14  
15  
16  
17  
18  
19  
20  
21  
22  
23  
24  
25  
26  
27  
28  
29  
30  
31  
32  
33  
34  
35  
36  
37  
38  
39  
40  
41  
42  
43  
44  
45  
46  
47  
48  
49  
50  
51  
52  
53  
54  
55  
56  
57  
58  
59  
60

| Anatomical region affected            |          |          |
|---------------------------------------|----------|----------|
| Upper limb and/or hand                | 19 (51%) | 20 (57%) |
| Lower limb and/or foot                | 11 (30%) | 10 (29%) |
| Chest, abdomen, and/or back           | 12 (32%) | 13 (37%) |
| Head, face, and/or neck               | 8 (22%)  | 10 (29%) |
| Buttocks, perineum, and/or genitals   | 5 (14%)  | 2 (6%)   |
| Number of anatomical regions affected |          |          |
| 1                                     | 24 (65%) | 21 (60%) |
| 2                                     | 8 (22%)  | 9 (26%)  |
| 3                                     | 5 (14%)  | 4 (11%)  |
| 4                                     | 0 (0%)   | 1 (3%)   |
| Required medication in the ED         |          |          |
| Paracetamol                           | 32 (86%) | 33 (94%) |
| Ibuprofen                             | 26 (70%) | 28 (80%) |
| Oxycodone                             | 21 (57%) | 21 (60%) |
| Fentanyl                              | 28 (76%) | 27 (77%) |
| Nitrous                               | 4 (11%)  | 4 (11%)  |
| Ketamine                              | 1 (3%)   | 1 (3%)   |
| Methoxyflurane                        | 2 (5%)   | 1 (3%)   |
| Morphine                              | 1 (3%)   | 0 (0%)   |
| Midazolam                             | 1 (3%)   | 0 (0%)   |
| Polypharmacy                          |          |          |
| 0                                     | 1 (3%)   | 0 (0%)   |
| 1                                     | 4 (11%)  | 3 (9%)   |
| 2                                     | 4 (11%)  | 4 (11%)  |
| 3                                     | 14 (38%) | 12 (34%) |
| 4                                     | 10 (27%) | 12 (34%) |
| 5                                     | 2 (5%)   | 4 (11%)  |
| 6                                     | 2 (5%)   | 0 (0%)   |
| Distraction Techniques                |          |          |
| Nil                                   | 13 (35%) | 9 (26%)  |
| Lollies/food                          | 1 (3%)   | 4 (11%)  |
| Sleeping                              | 2 (5%)   | 1 (3%)   |
| Television/phone distraction          | 15 (41%) | 11 (31%) |
| Bubbles/toys                          | 5 (14%)  | 7 (20%)  |
| Music therapy/clown doctors           | 1 (3%)   | 2 (6%)   |
| Ditto™ distraction device             | 0 (0%)   | 1 (3%)   |

1  
2  
3  
4  
5  
6  
7  
8  
9  
10  
11  
12  
13  
14  
15  
16  
17  
18  
19  
20  
21  
22  
23  
24  
25  
26  
27  
28  
29  
30  
31  
32  
33  
34  
35  
36  
37  
38  
39  
40  
41  
42  
43  
44  
45  
46  
47  
48  
49  
50  
51  
52  
53  
54  
55  
56  
57  
58  
59  
60

| Definitive dressings applied in ED          |                  |                |
|---------------------------------------------|------------------|----------------|
| Acticoat™ 3 + Mepitel™ + Hypafix®           | 13 (35%)         | 10 (29%)       |
| Acticoat™ 7 + Mepitel™ + Hypafix®           | 7 (19%)          | 8 (23%)        |
| Mepilex Ag™ + Hypafix®                      | 16 (43%)         | 16 (46%)       |
| Paraffin wax                                | 1 (3%)           | 1 (3%)         |
| Time (minutes) to ED presentation           | N = 36           | N = 34         |
|                                             | 90 (66 – 137)    | 79 (60 – 119)  |
| Time (minutes) spent in ED                  | 106.5 (66 – 151) | 113 (76 – 180) |
| Time (minutes) dressing was applied to burn | 34 (22-61)       | 35 (5-150)     |
| Documented first aid (20 minutes CRW)       | 36 (97%)         | 34 (97%)       |
| QAS applied Burnaid®                        | 11 (30%)         | 7 (20%)        |
| QAS applied PVC film                        | 8 (22%)          | 11 (31%)       |
| High pain risk stratum                      | 8 (22%)          | 9 (26%)        |

Data are presented as median (IQR) for continuous measures, and N (%) for categorical measures unless stated otherwise. † As a result of patients having multiple burns to different anatomical regions, LDI scans were taken of 91 burn wounds from 58 patients:  $n = 48$  burns for the intervention group and  $n = 43$  wounds for the control. N = number of participants; ED = emergency department; CRW = cold running water; QAS = Queensland ambulance service, TBSA = total body surface area; LDI = laser Doppler imaging; PU = perfusion units; PVC = plasticized polyvinylchloride.

No adverse events occurred in the intervention or control group. Sixteen participants ( $n = 4$  intervention and  $n = 12$  control) did not keep their randomised dressings on for the required 20-minute duration. Two main factors challenged dressing adherence during acute data collection in the ED. First, excessive wound exudate beneath the PVC film caused the dressings to slip off participant's burns. Second, a number of paediatric patients pulled at and removed their own dressings. Fidelity in these instances was compromised.

Throughout data collection, no children in the 4 – 8 age group reported having trouble self-reporting their pain to the investigator using the FPS – R. Data were collected for dressing changes four ( $n = 8$ ), five ( $n = 4$ ), six ( $n = 1$ ), seven ( $n = 1$ ), eight ( $n = 1$ ), nine ( $n = 1$ ) and ten ( $n = 1$ ) for patients requiring multiple dressing changes, but were not included in the analysis due to low numbers of participants in the trial requiring more than four dressings.

Successful LDI scans were completed for 58 out of the 72 participants during their first burn dressing change.

The revised standard scale of 0 – 1000 PU was used to measure burn depth from LDI scans. In accordance with previous studies, 0 – 250 PU indicated full thickness injuries, 250 – 625 PU represented deep dermal

1 partial thickness burns, and >625 PU corresponded to superficial partial thickness burns [38]. T-tests  
2 revealed no significant difference in LDI scores between the intervention or control group for mean  
3  
4  
5  
6 perfusion,  $p = 0.79$ . In addition, no difference in minimum LDI scores were found between the intervention  
7  
8 or control group,  $p = 0.20$ . Mean PUs for both groups were greater than or equal to 625 PU indicating  
9  
10 superficial partial thickness burn injuries. These values support clinical judgement from the treating surgical  
11  
12 consultants for burn depth assessment (see *Table 1*.)  
13  
14

### 15 3.2 Primary outcome

16 Acute pain scores collected in the ED before and after the application of the randomised dressing (T1 and  
17  
18 T2), and before and after silver dressing application (T3 and T4), are reported in *Table 2* for the two groups.  
19  
20 No significant between-group differences in pain scores (assessed using the FLACC scale from nursing staff)  
21  
22 were found between paediatric patients who received Burnaid® dressings and those who received PVC film  
23  
24 as an acute burn dressing in the ED following initial presentation to the QCH and CRW first aid. No  
25  
26 significant group differences in FLACC scores were found post-randomised dressing application (Mean  
27  
28 Difference: -0.1, 95% CI: -0.7 to 0.5,  $p = 0.72$ ), pre-silver dressing application (Mean Difference: -0.3, 95%  
29  
30 CI: -1 to 0.5,  $p = 0.51$ ), or post-silver dressing application (Mean Difference: 0, 95% CI: -0.8 to 0.9,  $p =$   
31  
32  
33  
34  
35  
36  
37  
38  
39  
40  
41  
42  
43  
44  
45  
46  
47  
48  
49  
50  
51  
52  
53  
54  
55  
56  
57  
58  
59  
60  
0.92).

**Table 2.** Acute pain scores in the ED

| Pain scale                   | Time point | N  | Intervention<br>Mean (SD) | N  | Control<br>Mean (SD) | Adjusted<br>Mean<br>Difference | 95% CI      | <i>p</i> value |
|------------------------------|------------|----|---------------------------|----|----------------------|--------------------------------|-------------|----------------|
| FLACC<br>(0 – 10 scale)      | T1         | 35 | 1.2 (2.1)                 | 23 | 0.7 (1.4)            | -                              | -           | -              |
|                              | T2         | 36 | 0.4 (1.0)                 | 35 | 0.4 (0.7)            | -0.1                           | -0.7 to 0.5 | 0.72           |
|                              | T3         | 36 | 0.4 (1.2)                 | 34 | 0.6 (1.6)            | -0.3                           | -1 to 0.5   | 0.51           |
|                              | T4         | 35 | 0.8 (1.7)                 | 33 | 0.7 (1.5)            | 0                              | -0.8 to 0.9 | 0.92           |
|                              | Peak Pain  | 36 | 3.4 (2.4)                 | 34 | 3.9 (2.8)            | 0.6                            | 1.7 to 0.5  | 0.29           |
| VAS<br>(0 – 100)             | T1         | 9  | 38 (29)                   | 2  | 20 (14)              | -                              | -           | -              |
|                              | T2         | 10 | 20 (22)                   | 4  | 28 (36)              | -14                            | -37 to 9    | 0.22           |
|                              | T3         | 11 | 16 (21)                   | 5  | 8 (18)               | 4                              | -18 to 26   | 0.74           |
|                              | T4         | 7  | 31 (25)                   | 4  | 25 (44)              | -1                             | -31 to 29   | 0.96           |
| FPS – R<br>(0 – 10)          | T1         | 9  | 3.3 (3.7)                 | 7  | 3.6 (2.6)            | -                              | -           | -              |
|                              | T2         | 10 | 2.8 (4.2)                 | 8  | 2.4 (3.0)            | 0.3                            | -1.7 to 2.2 | 0.78           |
|                              | T3         | 11 | 1.5 (3.3)                 | 11 | 1.3 (3.1)            | 0.6                            | -1.8 to 2.9 | 0.64           |
|                              | T4         | 10 | 2.9 (3.5)                 | 10 | 3.0 (4.1)            | 0.1                            | -3.1 to 3.3 | 0.96           |
| VAS<br>Observer<br>(0 – 100) | T1         | 34 | 32 (28)                   | 22 | 30 (21)              | -                              | -           | -              |
|                              | T2         | 34 | 22 (24)                   | 31 | 21 (19)              | 1                              | -8 to 11    | 0.78           |
|                              | T3         | 35 | 18 (20)                   | 34 | 18 (25)              | 0                              | -11 to 11   | 0.96           |
|                              | T4         | 33 | 24 (25)                   | 32 | 18 (26)              | 6                              | -7 to 18    | 0.36           |

\* Adjusted Mean Difference = Intervention Group – Control Group. FLACC = face, legs, activity, cry, consolability; VAS = visual analogue scale; FPS-R = faces pain scale revised; SD = standard deviation; CI = confidence interval; T1 = Timepoint 1; T2 = Timepoint 2; T3 = Timepoint 3; T4 = Timepoint 4.

### 3.2.1 Ancillary Pain Measures

#### 3.2.1.1. Parent and Caregiver Pain Scores (Observer VAS)

There were no significant differences in pain scores between the control and intervention group for observational pain ratings from parents and caregivers assessed using the VAS Observer in the ED. No significant between-group differences in VAS Observer pain scores were found between the intervention and control groups for post-randomised dressing application (Mean Difference: 1, 95% CI: -8 to 11,  $p = 0.78$ ), pre-silver dressing application (Mean Difference: 0, 95% CI: -11 to 11,  $p = 0.96$ ), or post-silver dressing application (Mean Difference: 6, 95% CI: -7 to 18,  $p = 0.36$ ) time points.

### 3.2.1.2 Child reported pain (FPS-R and VAS)

Child self-report pain scores measured using the FPS-R and VAS showed no significant between-group differences. Self-report FPS-R scores assessed post-dressing application (Mean Difference: 0.3, 95% CI: -1.7 to 2.2,  $p = 0.78$ ), pre-silver application (Mean Difference: 0.6, 95% CI: -1.8 to 2.9,  $p = 0.64$ ), and post-silver dressing application (Mean Difference: 0.1, 95% CI: -3.1 to 3.3,  $p = 0.96$ ) showed no significant group differences. As burn injuries often affect infants and children under the age of five, a small number of children recruited into the trial were aged over eight. The VAS for Pain is designed for children aged eight years and older. As a consequence of the median patient age, low numbers of participants were able to use this self-report pain scale and therefore limited statistical tests that could be performed. Median self-report VAS scores are presented in *Table 2* but should be interpreted with consideration of this sample size limitation.

## 3.3 Secondary outcomes

### 3.3.1 Physiological measures

No significant difference in mean pulse rate (Mean Difference: -3, 95% CI: -11 to 5,  $p = 0.41$ ) or temperature (Mean Difference: 0.6, 95% CI: -0.13 to 0.24,  $p = 0.53$ ) was detected between intervention and control groups following the application of the randomised dressings in the ED (see *Table 3*).

**Table 3.** Physiological measures in the ED

| Measure                     | Time point | N  | Intervention<br>Mean (SD) | N  | Control<br>Mean (SD) | Adjusted Mean<br>Difference | 95% CI        | <i>p</i> value |
|-----------------------------|------------|----|---------------------------|----|----------------------|-----------------------------|---------------|----------------|
| Pulse<br>(Beats/minute)     | T1         | 34 | 111 (27)                  | 24 | 112 (20)             | -                           | -             | -              |
|                             | T2         | 34 | 104 (26)                  | 32 | 109 (21)             | -3                          | -11 to 5      | 0.41           |
|                             | T3         | 33 | 105 (26)                  | 32 | 113 (21)             | -8                          | -16 to 1      | 0.07           |
|                             | T4         | 29 | 109 (25)                  | 31 | 113 (24)             | -3                          | -12 to 6      | 0.52           |
| Temperature<br>(° Celsius)  | T1         | 35 | 36.34                     | 25 | 36.42                | -                           | -             | -              |
|                             | T2         | 36 | 36.42                     | 33 | 36.36                | 0.6                         | -0.13 to 0.24 | 0.53           |
|                             | T3         | 36 | 36.43                     | 33 | 36.33                | 0.12                        | -0.12 to 0.37 | 0.33           |
|                             | T4         | 34 | 36.44                     | 33 | 36.32                | 0.14                        | -0.14 to 0.40 | 0.29           |
| Alpha-amylase<br>(units/mL) |            |    | † Mean (×/SD)             |    | † Mean (×/SD)        | † Ratio of Means            | 95% CI        |                |
|                             | T1         | 19 | 48 (×/2)                  | 8  | 46 (×/3)             | -                           | -             | -              |
|                             | T2         | 26 | 54 (×/3)                  | 20 | 37 (×/2)             | 1.53                        | 0.93 to 2.53  | 0.10           |

SD = standard deviation; CI = confidence interval; mL = millilitre; T1 = timepoint 1; T2 = timepoint 2; T3 = timepoint 3; T4 = timepoint 4. \* Adjusted Mean Difference = Intervention Group – Control Group. † Alpha-amylase data reported as geometric mean, geometric standard deviation, and ratio of geometric means.

### 3.3.2 Re-epithelialisation

Median (IQR) time to re-epithelialisation for the intervention group was 9 days (6.25 – 10.75) and 9 days (7.5 – 14) for the control group. Clinical assessment from treating surgeons showed no significant between-group differences in time to 95% re-epithelialisation, with a median difference (95% CI) equal to -1 (-3 to 1),  $p = 0.26$ . With regards to the blinded assessment of burn wound images, exact agreement between the treating surgical consultants and blinded review panel was used to examine agreement between health professionals measuring time to re-epithelialisation [39]. Agreement on evaluation of re-epithelialisation was found to be good (69% agreement) between the three expert reviewers and the treating surgeons (see *Appendix A* for additional agreement data).

### 3.3.3 Biochemical stress markers

No significant difference in sAA was found between the intervention and control group following the application of the randomised dressing during acute care in the ED (see *Table 3*). Children who received Burnaid® dressings did not show a reduction in the biochemical stress marker in comparison to paediatric

1 patients who received PVC film (Geometric Mean Ratio: 1.53, 95% CI = 0.93 to 2.53,  $p = 0.10$ ). Levels of  
2 sAA collected in the waiting room during dressing changes one (Geometric Mean Ratio: 1, 95% CI = 0.65 –  
3 1.56,  $p = 0.97$ ) and two (Geometric Mean Ratio: 1.14, 95% CI = 0.48 – 2.71,  $p = 0.75$ ) showed no significant  
4 differences between children who received Burnaid® dressings in the ED and those who received PVC film  
5  
6 (see *Appendix B*).  
7  
8  
9  
10  
11

### 12 3.3.4 Pain at first, second, and third dressing changes

13 Pain scores assessed in the Burns Outpatient Department during follow up dressing changes one to three are  
14 reported in *Appendix C* for the two treatment groups. No statistical differences in observational or child self-  
15 report follow up pain scores were found between children who received Burnaid® dressings and those who  
16 received PVC film during acute care. Temperature and pulse rate assessed during follow up dressing changes  
17 (as physiological indicators of pain) also showed no significant group differences over dressing changes one  
18 to three (see *Appendix B* for physiological data).  
19  
20  
21  
22  
23  
24  
25  
26

### 27 3.3.5 Staff and caregiver perspectives on dressings

28 Dressing satisfaction from clinical staff, in addition to parents and caregivers, assessed in the ED during  
29 acute care is presented in *Appendix D*. No significant differences in ease of dressing application, removal,  
30 flexibility, or conformity were identified between the two groups from ED nursing staff. Parents are  
31 caregivers reported higher satisfaction scores for ease of dressing application for children who received  
32 Burnaid dressings, in comparison to those who received PVC film ( $p = 0.013$ ). Parent/caregiver satisfaction  
33 scores were also higher for ease of dressing removal within the Burnaid arm, in comparison to the control  
34 arm ( $p = 0.045$ ). Furthermore, parents and caregivers reported higher satisfaction scores for ease of  
35 movement for children who received Burnaid, in comparison to paediatric patients who received PVC film in  
36 the ED ( $p = 0.047$ ). Last, no significant differences in perceived patient comfort were identified between the  
37 two groups from parents and caregivers using the 0 – 10 NRS.  
38  
39  
40  
41  
42  
43  
44  
45  
46  
47  
48  
49  
50  
51

## 52 4. Discussion

53 There has been an emergence of research demonstrating the importance of acute pain control in traumatic  
54 injuries, emphasising the association between untreated pain and maladaptive outcomes such as: prolonged  
55 wound healing [4, 5], long-term emotional disorders [6, 7], and chronic pain conditions [8, 9]. Pain is a chief  
56  
57  
58  
59  
60



1  
2 complaint for patients with burn injuries in the acute setting [40, 41]. Therefore, prehospital and acute care  
3  
4 providers have a crucial role in recognising and reducing the burden of pain for these patients. Reducing  
5  
6 acute pain is of particular importance for paediatric burn patients who often have to undergo numerous  
7  
8 painful and distressing medical procedures during their care. The better pain and distress are managed during  
9  
10 a child's first visit to the ED for burn wound treatment– the lower the child's chances are of developing  
11  
12 anticipatory anxiety and avoidance behaviours for future medical procedures [42]. Effective non-  
13  
14 pharmacological interventions for the management of acute burn pain are needed to supplement  
15  
16 pharmacological methods of pain reduction in paediatric patients [35, 43]. We were pleasantly reassured to  
17  
18 find most burn patients presenting to our ED had mild to no pain. Because of this, examining the  
19  
20 effectiveness of acute burn dressings on reducing acute pain score was restricted – and results from this  
21  
22 prospective RCT should be interpreted with the acknowledgement of this limitation. At present, there are no  
23  
24 high level trials supporting the use of Burnaid® hydrogel dressings for acute burn management. The aim of  
25  
26 this trial was to fill this gap in the literature, and examine the effectiveness of Burnaid® dressings on  
27  
28 reducing acute pain scores in children with thermal burns. To the best of our knowledge, this is the first  
29  
30 prospective RCT conducted in a paediatric burn population examining the analgesic properties of a hydrogel  
31  
32 burn dressing in an ED setting.  
33  
34

35  
36 Results from this prospective RCT should be interpreted with consideration of several limitations. First, very  
37  
38 few participants had moderate to severe pain scores following their initial presentation to the QCH prior to  
39  
40 recruitment into the trial - see *Appendix E* for complete pain score frequencies. More than 60% of paediatric  
41  
42 burn patients received observational pain scores of zero (out of ten using the FLACC pain scale) from ED  
43  
44 nursing staff. Moreover, an additional 19% of children received pain ratings equal to one (using the ten-point  
45  
46 scale) following initial presentation to the ED. A significant effect of the intervention on reducing acute burn  
47  
48 pain might not have been identified in this trial because pain scores were so low following patient's first  
49  
50 presentation to hospital for their burn.  
51  
52

53  
54 Second, prehospital and referral services in Queensland acted to provide comprehensive pharmacotherapies  
55  
56 for pain management to paediatric patients with thermal burns during transportation to the QCH. So much so  
57  
58 that pain scores might have been too low to observe a significant reduction following application of the  
59  
60 intervention or control. A large proportion (78%) of patients enrolled in the trial received three or more

1 medication classes during their acute burn care – the most common combination being paracetamol,  
2  
3 ibuprofen, fentanyl for both groups (see *Table 1*). The third limitation also relates to prehospital care, and  
4  
5 includes the use of different acute burn dressings during patient transport to hospital, prior to randomisation  
6  
7 and enrolment in the trial. As this was a pragmatic trial aiming to simulate real-world clinical scenarios  
8  
9 within the ED, the application of prehospital acute burn dressings was not an exclusion criterion for  
10  
11 participation. However, this meant that some participants received PVC film or Burnaid prior to presenting  
12  
13 to the QCH, which may have had confounding effects.  
14  
15

16  
17 The last limitation relates to potential moderating effects. Non-pharmacological interventions such as  
18  
19 distraction are commonplace during paediatric medical procedures. Almost 70% of all participants received  
20  
21 additional distraction techniques during their acute burn treatment in the ED such as video distraction using  
22  
23 mobile phones and television, clown doctors, music therapists, bubbles, toys, and lollies (see *Table 1*). These  
24  
25 non-pharmacological interventions were also left in place to simulate a real-world pragmatic trial, however  
26  
27 could have moderated the effect of the intervention. An effect of the intervention on reducing acute pain  
28  
29 scores might not have been detected due to the low pain scored at initial presentation, analgesia on-board at  
30  
31 the time of recruitment, or other confounding factors such as the application of prehospital burn dressings  
32  
33 prior to enrolment in the trial. It is therefore recommended that this research be replicated in the prehospital  
34  
35 setting – where acute pain scores are anticipated to be higher and the application of prehospital burn dressings  
36  
37 and analgesia can be better controlled.  
38  
39

## 40 41 42 **5. Conclusion**

43  
44 It was predicted that Burnaid® dressings would provide superior analgesia for paediatric burn patients when  
45  
46 applied as an adjunct to CRW first aid, in comparison to PVC film (current standard practice). However, the  
47  
48 effect of the intervention on reducing acute pain scores was not supported in this investigation and we were  
49  
50 unable to show a clinically relevant treatment effect caused by the intervention – Burnaid® hydrogel  
51  
52 dressings. Results from this RCT found no significant between-group differences in observational pain  
53  
54 scores assessed using the FLACC pain scale from ED nursing staff – the primary outcome of the trial.  
55  
56 Moreover, no significant group-differences in parent/caregiver pain scores or child self-report pain scores  
57  
58 were identified during acute care in the ED or follow up wound care in the Burns OPD. The effect of the  
59  
60

1  
2 intervention on additional outcomes including, time to re-epithelialisation, stress, temperature, heart rate, and  
3  
4 need for analgesic medication was also not supported. Ease of dressing application and removal, in addition  
5  
6 to ease of patient movement whilst dressings were applied, were higher for the Burnaid group in accordance  
7  
8 with parent and caregiver ratings. Dressing satisfaction measures from clinical staff within the ED found no  
9  
10 significant differences between patients who received Burnaid and those who received PVC film. Moreover,  
11  
12 no difference in perceived comfort ratings from parents and caregivers were identified between the two  
13  
14 groups. Research investigating adjunctive methods of pain control for children with burns holds great  
15  
16 translational value. It was predicted that an acute burn dressing with additional cooling and evaporative  
17  
18 properties would provide superior pain relief for children with thermal burns, in comparison to PVC film.  
19  
20 This was not supported, and Burnaid® dressings do not appear to provide superior pain relief in comparison  
21  
22 to PVC film when applied as an acute burn dressing following first aid and initial presentation to the ED.  
23  
24  
25  
26  
27  
28  
29  
30  
31  
32  
33  
34  
35  
36  
37  
38  
39  
40  
41  
42  
43  
44  
45  
46  
47  
48  
49  
50  
51  
52  
53  
54  
55  
56  
57  
58  
59  
60

## Declarations

### *Funding*

This work was supported by a research grant given to The University of Queensland by Mundipharma (Grant Number: 364010399) and an Australian Government Research Training Scholarship awarded to the primary investigator. Mundipharma had no role in the development of the trial, data collection, data analysis, or interpretation of results.

### *Conflicts of Interests*

All authors who contributed to this original research manuscript declare no conflicts of interests. All authors declare no financial or other interests in the product (Burnaid®) or distributor of the product (Mundipharma).

All authors declare no past or existing relationships with the manufacturer or distributor of the product.

Moreover, all authors declare no additional associations with the product manufacturer or distributor including consultancies, stock ownership, or other equity interests or patent-licensing arrangements.

### *Author Statement*

RMK and BRG conceived the research, designed the trial, and obtained research funding. MDH undertook participant recruitment, acute and follow up data collection, data management, and interpretation of results. MDC provided statistical support and conducted the formal analyses. MDH wrote the draft manuscript, and all authors provided critical review of the article and approved the final manuscript. MDH takes responsibility for the paper as a whole.

### *Acknowledgments*

We want to thank all the children and families for their time and participation in our research. We also wish to acknowledge and give thanks to the Burns, Surgical, and ED staff at the Queensland Children's Hospital for their support in the development and implementation of this research.

### *Data Sharing*

Additional data available upon request.

### *Word Count*

5133

## References

1. Scott LE, Crilly J, Chaboyer W, et al. Paediatric pain assessment and management in the emergency setting: The impact of a paediatric pain bundle. *Int Emerg Nurs*. 2013;21(3):173-19.
2. Summer GJ, Puntillo KA, Miaskowski C, et al. Burn injury pain: The continuing challenge. *J Pain*. 2007;8(7):533-48.
3. Morgan M, Deuis JR, Frøsig-Jørgensen M, et al. Burn pain: A systematic and critical review of epidemiology, pathophysiology, and treatment. *Pain Med*. 2018;19(4):708-34.
4. Brown NJ, Kimble RM, Rodger S, et al. Play and heal: Randomised controlled trial of Ditto™ intervention efficacy on improving re-epithelialization in pediatric burns. *Burns*. 2013;40(2):204-13.
5. Brown NJ, Kimble RM, Gramotnev G, et al. Predictors of re-epithelialization in pediatric burn. *Burns*. 2013.
6. De Young AC, Kenardy JA, Cobham VE, et al. Prevalence, comorbidity and course of trauma reactions in young burn-injured children. *J Child Psychol Psychiatry*. 2012;53(1):56-63.
7. Norman SB, Stein MB, Dimsdale JE, et al. Pain in the aftermath of trauma is a risk factor for post-traumatic stress disorder. *Psychol Med*. 2008;38(4):533-42.
8. Dauber A, Osgood PF, Breslau AJ, et al. Chronic Persistent Pain After Severe Burns: A Survey of 358 Burn Survivors. *Pain Med*. 2002;3(1):6-17.
9. Wollgarten-Hadamek I, Hohmeister J, Zohsel K, et al. Do school-aged children with burn injuries during infancy show stress-induced activation of pain inhibitory mechanisms? *Eur J Pain*. 2011;15(4):423.e1-e10.
10. Cuttle L, Kempf M, Liu PY, et al. The optimal duration and delay of first aid treatment for deep partial thickness burn injuries. *Burns*. 2010;36(5):673-9.
11. Bartlett N, Yuan J, Holland AJ, et al. Optimal duration of cooling for an acute scald contact burn injury in a porcine model. *J Burn Care Res*. 2008;29(5):828-34.
12. The Australian and New Zealand Burn Association. Emergency management of severe burns. 13 ed: Australian and New Zealand Burn Association; 2009.
13. Cuttle L, Kempf M, Kravchuk O, et al. The optimal temperature of first aid treatment for partial thickness burn injuries. *Wound Repair Regen*. 2008;16(5):626-34.
14. Griffin BR, Frear CC, Babl F, et al. Cool Running Water First Aid Decreases Skin Grafting Requirements in Pediatric Burns: A Cohort Study of Two Thousand Four Hundred Ninety-five Children. *Ann Emerg Med*. 2019.
15. Allison K, Porter K. Consensus on the pre-hospital approach to burns patient management. *Injury*. 2004;35(8):734-8.
16. Fein M, Quinn J, Watt K, et al. Prehospital paediatric burn care: New priorities in paramedic reporting. *Emerg Med Australas*. 2014;26(6):609-15.

17. Holbert MD, Griffin BR, McPhail SM, et al. Effectiveness of a hydrogel dressing as an analgesic adjunct to first aid for the treatment of acute paediatric thermal burn injuries: study protocol for a randomised controlled trial. *Trials*. 2019;20(1):13.
18. Milner RH, Hudson SJ, Reid CA. Plasticized polyvinyl chloride film as a primary burns dressing: a microbiological study. *Burns*. 1988;14(1):62-5.
19. Lendrum J, Bowen-Jones E. A new dressing for burns: Enclosure in a plasticized polyvinyl chloride sheet. *Burns*. 1976;2(2):86-9.
20. Merkel S, Voepel-Lewis T, Malviya S. Pain assessment in infants and young children: The FLACC scale: A behavioral tool to measure pain in young children. *Am J Nurs*. 2002;102(10):55-58.
21. Willis MHW. FLACC behavioural pain assessment scale: A comparison with the child's self-report. *Pediatr Nurs*. 2003;29(3):195-8.
22. Gomez R, Barrowman N, Elia S, et al. Reliability of the flacc scale for evaluating pain in toddlers. *Irish J Med Sci*. 2012;181(11):456-456.
23. von Baeyer CL. Children's self-report of pain intensity: what we know, where we are headed. *Pain research & management*. 2009;14(1):39-45.
24. Hicks CL, von Baeyer CL, Spafford PA, et al. The Faces Pain Scale – Revised: Toward a common metric in pediatric pain measurement. *Pain*. 2001;93(2):173-83.
25. Bailey B, Gravel J, Daoust R. Reliability of the visual analog scale in children with acute pain in the emergency department. *Pain*. 2012;153(4):839-42.
26. Stinson NJ, Kavanagh NT, Yamada NJ, et al. Systematic review of the psychometric properties, interpretability and feasibility of self-report pain intensity measures for use in clinical trials in children and adolescents. *Pain*. 2006;125(12):143-57.
27. Taddio A, O'brien L, Ipp M, et al. Reliability and validity of observer ratings of pain using the visual analog scale (VAS) in infants undergoing immunization injections. *Pain*. 2009;147(123):141-6.
28. Brown NJ, Kimble RM, Rodger S, et al. Biological markers of stress in pediatric acute burn injury. *Burns*. 2014;40(5):887-95.
29. Dibildox M, Jeschke MG, Herndon DN. Burn Injury, Rule of Nines. In: Vincent J-L, Hall JB, editors. *Encyclopedia of Intensive Care Medicine*. Berlin, Heidelberg: Springer Berlin Heidelberg; 2012. 417-9.
30. Wang X-Q, Mill J, Kravchuk O, et al. Ultrasound assessed thickness of burn scars in association with laser Doppler imaging determined depth of burns in paediatric patients. *Burns*. 2010;36(8):1254-62.
31. Mill J, Cuttle L, Harkin DG, et al. Laser Doppler imaging in a paediatric burns population. *Burns*. 2009;35(6):824-31.
32. Gill P. The critical evaluation of laser Doppler imaging in determining burn depth. *Int J Burns Trauma*. 2013;3(2):72-7.
33. Štětinský J, Klosová H, Kolářová H, et al. The time factor in the LDI (Laser Doppler Imaging) diagnosis of burns. *Lasers Surg Med*. 2015;47(2):196-202.

- 1  
2 34. Wearn C, Lee KC, Hardwicke J, et al. Prospective comparative evaluation study of Laser Doppler  
3 Imaging and thermal imaging in the assessment of burn depth. *Burns*. 2018;44(1):124-33.  
4  
5 35. Miller K, Rodger S, Kipping B, et al. A novel technology approach to pain management in children  
6 with burns: A prospective randomized controlled trial. *Burns*. 2011;37(3):395.  
7  
8 36. StataCorp. Stata Statistical Software: Release 16. College Station TSL.  
9  
10 37. Limpert E, Stahel WA. Problems with Using the Normal Distribution - and Ways to Improve Quality  
11 and Efficiency of Data Analysis. *PLoS One*. 2011.  
12  
13 38. Chester SJ, Tyack Z, De Young A, et al. Efficacy of hypnosis on pain, wound-healing, anxiety, and  
14 stress in children with acute burn injuries: A randomised controlled trial. *Pain*. 2018;159(9):1790.  
15  
16 39. de Vet HCW, Terwee CB, Knol DL, et al. When to use agreement versus reliability measures. *J Clin*  
17 *Epidemiol*. 2006;59(10):1033-9.  
18  
19 40. Yuxiang L, Lingjun Z, Lu T, et al. Burn patients' experience of pain management: A qualitative  
20 study. *Burns*. 2012;38(2):180-6.  
21  
22 41. Nedelec JB, Carrougher JG. Pain and Pruritus Postburn Injury. *J Burn Care Res*. 2017;38(3):142-5.  
23  
24 42. Michalska JK, Feldman SJ, Abend LR, et al. Anticipatory Effects on Perceived Pain: Associations  
25 With Development and Anxiety. *Psychosom Med*. 2018;80(9):853-60.  
26  
27 43. Miller K, Rodger S, Bucolo S, et al. Multi-modal distraction. Using technology to combat pain in  
28 young children with burn injuries. *Burns*. 2010;36(5):647-58.  
29  
30  
31  
32  
33  
34  
35  
36  
37  
38  
39  
40  
41  
42  
43  
44  
45  
46  
47  
48  
49  
50  
51  
52  
53  
54  
55  
56  
57  
58  
59  
60

1  
2 **Figure Legend**  
3

4 **Figure 1.** Consort flow diagram  
5

6  
7 **Figure 2.** Pain assessment timepoints during acute and follow up care  
8  
9  
10  
11  
12  
13  
14  
15  
16  
17  
18  
19  
20  
21  
22  
23  
24  
25  
26  
27  
28  
29  
30  
31  
32  
33  
34  
35  
36  
37  
38  
39  
40  
41  
42  
43  
44  
45  
46  
47  
48  
49  
50  
51  
52  
53  
54  
55  
56  
57  
58  
59  
60

For peer review only



**Figure 1. Consort Flow Diagram**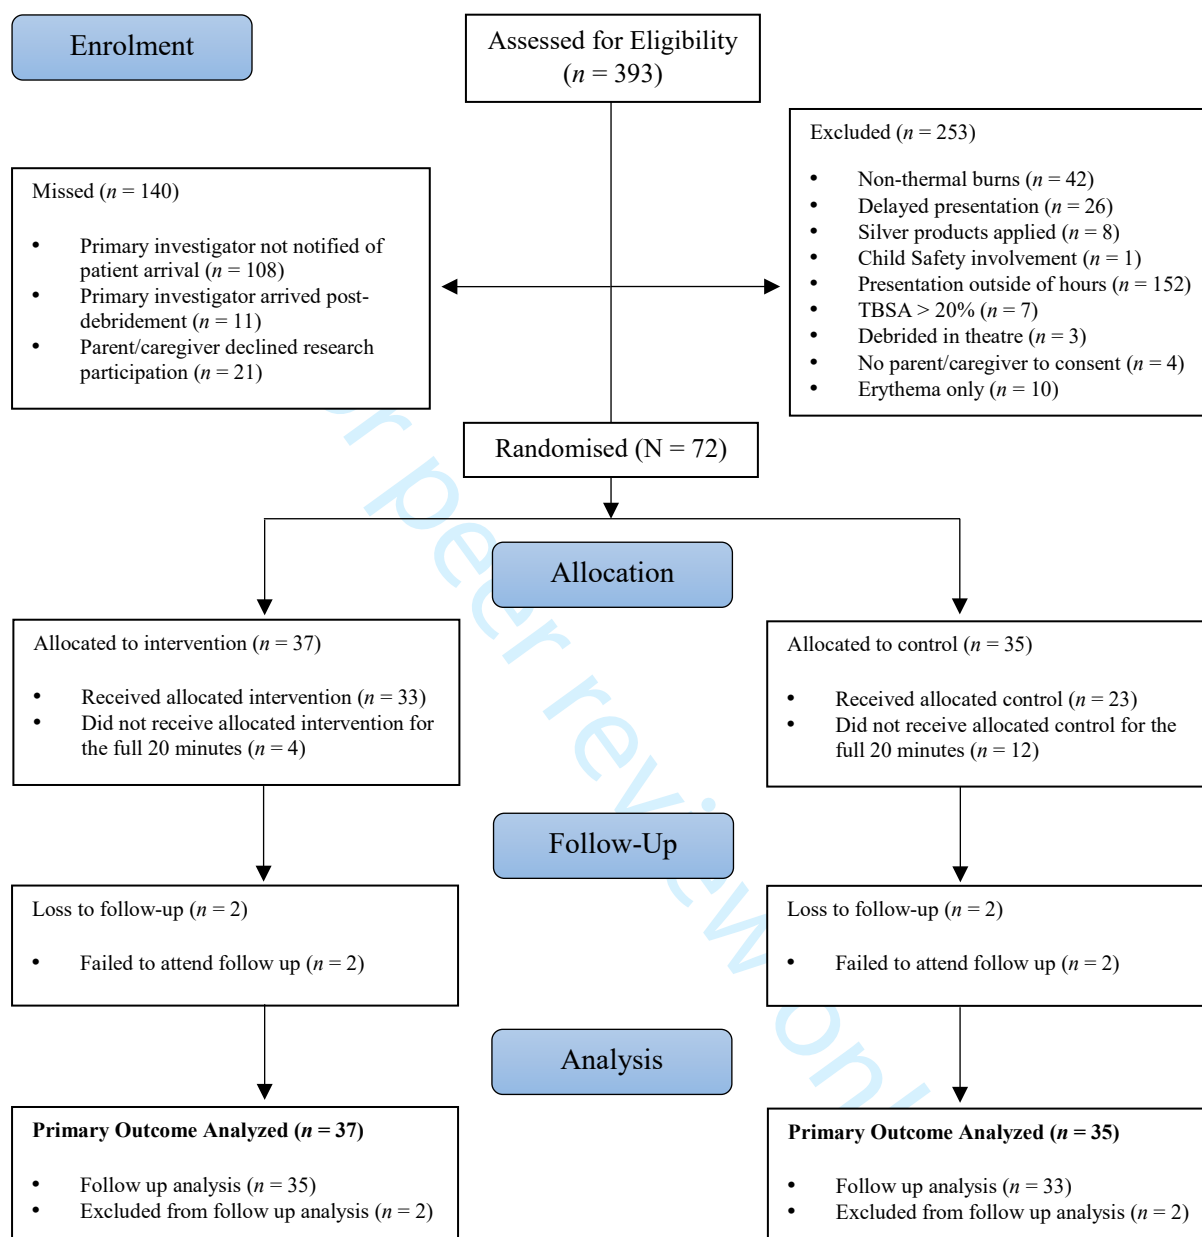

1 Figure 2A

2  
3  
4  
5  
6  
7  
8  
9  
10  
11  
12  
13  
14  
15  
16  
17  
18  
19  
20  
21  
22  
23  
24  
25  
26  
27  
28  
29  
30  
31  
32  
33  
34  
35  
36  
37  
38  
39  
40  
41  
42  
43  
44  
45  
46  
47  
48  
49  
50  
51  
52  
53  
54  
55  
56  
57  
58  
59  
60

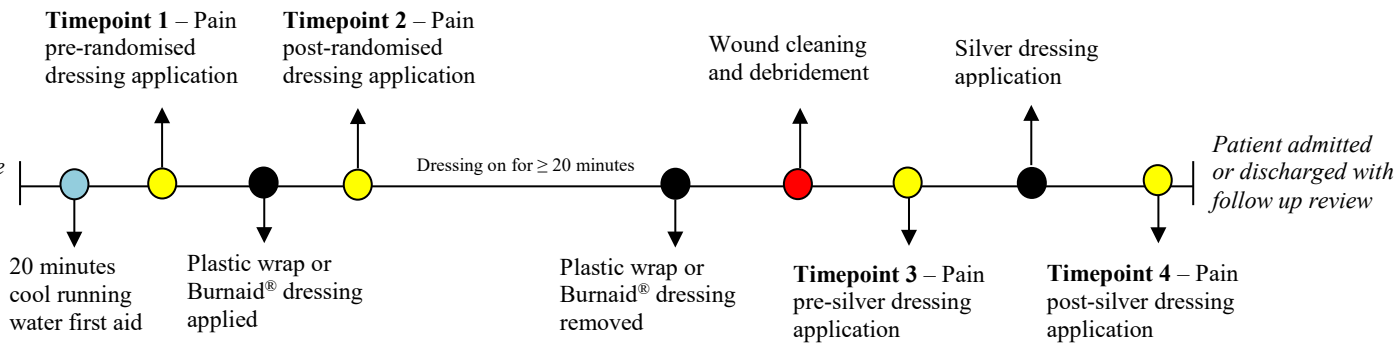

19 Figure 2B

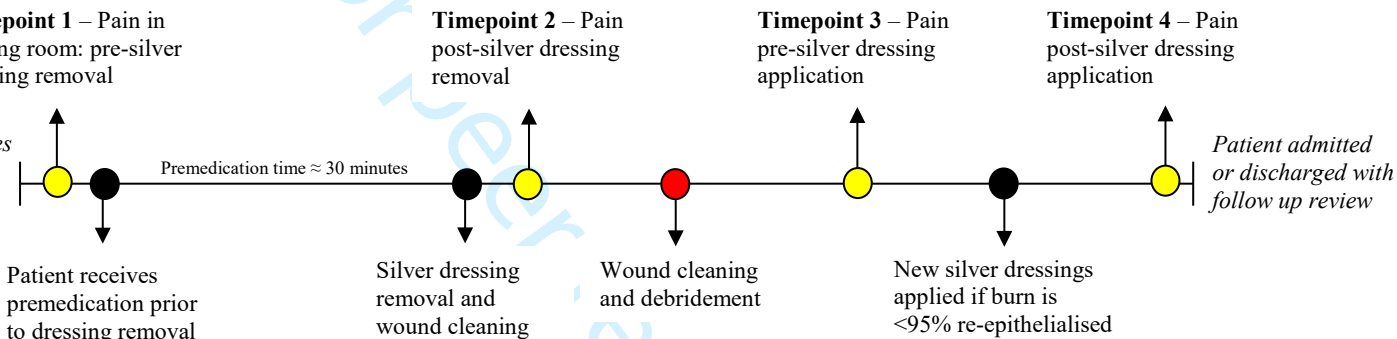

**Appendix A.** Exact agreement between clinicians assessing time to re-epithelialization: Treating surgical consultant versus blinded expert panel

| Clinicians                | Agreement between Clinicians |
|---------------------------|------------------------------|
| Consultant and Reviewer 1 | 64%                          |
| Consultant and Reviewer 2 | 64%                          |
| Consultant and Reviewer 3 | 69%                          |
| Reviewer 1 and Reviewer 2 | 71%                          |
| Reviewer 1 and Reviewer 3 | 71%                          |
| Reviewer 2 and Reviewer 3 | 75%                          |

## Appendix B. Physiological measures at follow up dressing changes

| Measure                              | Time point                      | Intervention<br>Mean (SD)              | Control<br>Mean (SD)                   | Adjusted Mean<br>Difference (95% CI) | <i>p</i> value |
|--------------------------------------|---------------------------------|----------------------------------------|----------------------------------------|--------------------------------------|----------------|
| Pulse rate<br>(beats/minute)         | 1 <sup>st</sup> Dressing Change |                                        |                                        |                                      |                |
|                                      | T1                              | 104.1 (21.7)                           | 109.9 (19.0)                           | -6 (-17 to 5)                        | 0.29           |
|                                      | T2                              | 100.4 (23.6)                           | 104.9 (17.4)                           | -4 (-17 to 8)                        | 0.47           |
|                                      | T3                              | 98.3 (25.8)                            | 104.9 (15.3)                           | -7 (-20 to 7)                        | 0.33           |
|                                      | T4                              | 99.3 (24.1)                            | 109.6 (19.68)                          | -10 (-24 – 3)                        | 0.13           |
|                                      | 2 <sup>nd</sup> Dressing Change |                                        |                                        |                                      |                |
|                                      | T1                              | 104.2 (21.4)                           | 119.1 (22.7)                           | -15 (-30 to 0)                       | 0.05           |
|                                      | T2                              | 100.9 (20.9)                           | 109.9 (23.0)                           | -9 (-25 to 7)                        | 0.25           |
|                                      | T3                              | 95.7 (20.5)                            | 104.0 (20.6)                           | -8 (-29 to 12)                       | 0.41           |
|                                      | T4                              | 95.7 (21.5)                            | 104.3 (19.9)                           | -9 (-33 to 16)                       | 0.45           |
|                                      | 3 <sup>rd</sup> Dressing Change |                                        |                                        |                                      |                |
|                                      | T1                              | 108 (12.2)                             | 111.3 (27.8)                           | -3 (-33 to 16)                       | 0.81           |
|                                      | T2                              | 98.4 (19.9)                            | 103.9 (18.8)                           | -6 (-33 to 16)                       | 0.60           |
|                                      | T3                              | 95.3 (24.2)                            | 94.8 (19.0)                            | 1 (-33 to 16)                        | 0.97           |
|                                      | T4                              | 96.3 (31.1)                            | 102.0 (28.3)                           | -9 (-33 to 16)                       | 0.81           |
|                                      | Temperature<br>(° Celsius)      | 1 <sup>st</sup> Dressing Change        |                                        |                                      |                |
| T1                                   |                                 | 36.1 (0.4)                             | 36.0 (0.4)                             | 0.05 (-0.17 to 0.26)                 | 0.66           |
| T2                                   |                                 | 36.3 (0.6)                             | 36.2 (0.5)                             | 0.05 (-0.23 to 0.33)                 | 0.71           |
| T3                                   |                                 | 36.2 (0.4)                             | 36.2 (0.5)                             | -0.05 (-0.29 to 0.19)                | 0.66           |
| T4                                   |                                 | 36.2 (0.4)                             | 36.3 (0.5)                             | -0.03 (-0.29 to 0.22)                | 0.81           |
| 2 <sup>nd</sup> Dressing Change      |                                 |                                        |                                        |                                      |                |
| T1                                   |                                 | 35.9 (0.4)                             | 35.9 (0.4)                             | 0.02 (-0.21 to 0.25)                 | 0.85           |
| T2                                   |                                 | 36.2 (0.4)                             | 36.3 (0.5)                             | -0.08 (-0.35 to 0.25)                | 0.57           |
| T3                                   |                                 | 36.3 (0.4)                             | 36.3 (0.4)                             | -0.02 (-0.37 to 0.25)                | 0.9            |
| T4                                   |                                 | 36.2 (0.4)                             | 36.3 (0.3)                             | -0.16 (-0.43 to 0.25)                | 0.23           |
| 3 <sup>rd</sup> Dressing Change      |                                 |                                        |                                        |                                      |                |
| T1                                   |                                 | 36.2 (0.9)                             | 36.1 (0.4)                             | 0.19 (-0.44 to 0.83)                 | 0.53           |
| T2                                   |                                 | 36.6 (0.6)                             | 36.4 (0.3)                             | 0.18 (-0.27 to 0.63)                 | 0.4            |
| T3                                   |                                 | 36.8 (0.4)                             | 36.2 (0.3)                             | 0.52 (-0.02 to 1.06)                 | 0.06           |
| T4                                   |                                 | 36.9 (0.5)                             | 36.4 (0.2)                             | 0.5 (-0.02 to 1.02)                  | 0.06           |
| Salivary $\alpha$ -amylase<br>(U/mL) |                                 | 1 <sup>st</sup> Dressing Change        |                                        |                                      |                |
|                                      | T1                              | † Mean ( $\times$ /SD)<br>39 (24 – 70) | † Mean ( $\times$ /SD)<br>43 (23 – 65) | 1.00 (0.65 to 1.56)                  | 0.97           |
|                                      | 2 <sup>nd</sup> Dressing Change |                                        |                                        |                                      |                |
| T1                                   | 43 (17 – 106)                   | 28 (14 – 77)                           | 1.14 (0.48 to 2.71)                    | 0.75                                 |                |

SD = standard deviation; CI = confidence interval. U/mL = units per milliliter; T1 = timepoint 1; T2 = timepoint 2; T3 =  
timepoint 3; T4 = timepoint 4. \* Adjusted Mean Difference = Intervention Group – Control Group.

For peer review only

### Appendix C. Pain at dressing changes one, two, and three

| Pain Assessment Timepoint             | N (Intervention) | Intervention<br>Mean (SD) | N (Control) | Control<br>Mean (SD) | Adjusted Mean<br>Difference (95% CI) | <i>p</i> value |
|---------------------------------------|------------------|---------------------------|-------------|----------------------|--------------------------------------|----------------|
| <b>Nurse: FLACC (0 – 10)</b>          |                  |                           |             |                      |                                      |                |
| 1 <sup>st</sup> Dressing Change       |                  |                           |             |                      |                                      |                |
| T1                                    | 36               | 0.0 (0.0)                 | 33          | 0.0 (0.2)            | 0.0 (-0.1 to 0)                      | 0.3            |
| T2                                    | 34               | 1.3 (1.7)                 | 31          | 1.1 (1.6)            | 0.2 (-0.7 to 1.0)                    | 0.69           |
| T3                                    | 28               | 0.1 (0.3)                 | 29          | 0.1 (0.4)            | 0.0 (-0.2 to 0.2)                    | 0.73           |
| T4                                    | 28               | 0.4 (0.9)                 | 28          | 0.2 (0.5)            | 0.2 (-0.2 to 0.6)                    | 0.36           |
| Peak FLACC                            | 34               | 2.1 (1.9)                 | 31          | 1.7 (1.5)            | 0.3 (-0.5 to 1.2)                    | 0.41           |
| 2 <sup>nd</sup> Dressing Change       |                  |                           |             |                      |                                      |                |
| T1                                    | 26               | 0.0 (0.0)                 | 28          | 0.0 (0.0)            | 0.0 (0.0)                            | -              |
| T2                                    | 24               | 1.1 (1.7)                 | 27          | 0.6 (1.3)            | 0.5 (-0.4 to 1.3)                    | 0.25           |
| T3                                    | 12               | 0.0 (0.0)                 | 16          | 0.5 (1.5)            | -0.5 (-1.4 to 0.4)                   | 0.28           |
| T4                                    | 12               | 0.2 (0.4)                 | 14          | 0.3 (0.7)            | -0.1 (-0.6 to 0.4)                   | 0.62           |
| Peak FLACC                            | 24               | 1.6 (1.8)                 | 27          | 1.0 (1.6)            | 0.6 (-0.3 to 1.6)                    | 0.20           |
| 3 <sup>rd</sup> Dressing Change       |                  |                           |             |                      |                                      |                |
| T1                                    | 7                | 0.0 (0.0)                 | 14          | 0.0 (0.0)            | 0.0 (0.0)                            | -              |
| T2                                    | 7                | 0.1 (0.4)                 | 12          | 0.6 (0.7)            | -0.4 (-1.0 to 0.1)                   | 0.13           |
| T3                                    | 3                | 0.3 (0.6)                 | 7           | 0.4 (1.1)            | -0.1 (-1.7 to 1.5)                   | 0.9            |
| T4                                    | 3                | 0.0 (0.0)                 | 7           | 0.0 (0.0)            | 0.0 (0.0)                            | -              |
| Peak FLACC                            | 7                | 1.4 (1.4)                 | 13          | 0.8 (0.9)            | 0.6 (-0.5 to 1.7)                    | 0.27           |
| <b>Parent: VAS Observer (0 – 100)</b> |                  |                           |             |                      |                                      |                |
| 1 <sup>st</sup> Dressing Change       |                  |                           |             |                      |                                      |                |
| T1                                    | 34               | 8.2 (18.8)                | 32          | 3.4 (9.7)            | 5 (-3.0 to 12.0)                     | 0.2            |
| T2                                    | 33               | 31.5 (37.9)               | 31          | 18.5 (23.8)          | 13 (-3.0 to 29.0)                    | 0.11           |
| T3                                    | 27               | 18.9 (28.2)               | 29          | 9.7 (17.6)           | 9 (-3.0 to 22.0)                     | 0.14           |
| T4                                    | 27               | 19.1 (26.7)               | 28          | 7.1 (20.2)           | 12 (-1.0 to 25.0)                    | 0.07           |
| Peak VAS                              | 33               | 42.1 (35.2)               | 29          | 29.5 (22.3)          | 13 (-3.0 to 28.0)                    | 0.10           |
| 2 <sup>nd</sup> Dressing Change       |                  |                           |             |                      |                                      |                |
| T1                                    | 25               | 4.4 (11.6)                | 28          | 1.4 (4.5)            | 3 (-2.0 to 8.0)                      | 0.21           |
| T2                                    | 23               | 14.1 (23.2)               | 27          | 9.6 (20.5)           | 5 (-8.0 to 17.0)                     | 0.47           |
| T3                                    | 11               | 7.7 (19.9)                | 15          | 2.7 (4.6)            | 5 (-6.0 to 16.0)                     | 0.35           |
| T4                                    | 11               | 12.3 (21.1)               | 13          | 3.1 (8.5)            | 9 (-4.0 to 22.0)                     | 0.16           |
| Peak VAS                              | 22               | 21.4 (30.3)               | 26          | 13.8 (21.7)          | 8 (-8.0 to 22.0)                     | 0.32           |
| 3 <sup>rd</sup> Dressing Change       |                  |                           |             |                      |                                      |                |
| T1                                    | 7                | 4.3 (11.3)                | 13          | 2.3 (8.3)            | 2 (-7.0 to 11.0)                     | 0.66           |

|    |  |                                 |   |             |    |             |                      |      |
|----|--|---------------------------------|---|-------------|----|-------------|----------------------|------|
| 1  |  |                                 |   |             |    |             |                      |      |
| 2  |  |                                 |   |             |    |             |                      |      |
| 3  |  | T2                              | 6 | 11.7 (16.0) | 11 | 8.2 (10.8)  | 3 (-10.0 to 17.0)    | 0.60 |
| 4  |  | T3                              | 6 | 5.0 (7.1)   | 7  | 8.6 (12.1)  | -4 (-25.0 to 18.0)   | 0.71 |
| 5  |  | T4                              | 3 | 0.0 (0.0)   | 6  | 3.3 (8.2)   | -3 (-18.0 to 12.0)   | 0.60 |
| 6  |  | Peak VAS                        | 5 | 20.0 (14.1) | 11 | 11.8 (11.7) | 8 (-6.0 to 23.0)     | 0.24 |
| 7  |  |                                 |   |             |    |             |                      |      |
| 8  |  |                                 |   |             |    |             |                      |      |
| 9  |  | <b>Child: FPS – R</b>           |   |             |    |             |                      |      |
| 10 |  |                                 |   |             |    |             |                      |      |
| 11 |  | 1 <sup>st</sup> Dressing Change |   |             |    |             |                      |      |
| 12 |  | T1                              | 8 | 0.00 (0.00) | 10 | 0.1 (0.3)   | -0.1 (-.3 to .1)     | 0.39 |
| 13 |  | T2                              | 9 | 2.7 (4.4)   | 9  | 2.4 (3.4)   | 0.2 (-3.7 to 4.1)    | 0.91 |
| 14 |  | T3                              | 7 | 2.0 (3.5)   | 8  | 2.3 (3.6)   | -0.2 (-4.2 to 3.7)   | 0.89 |
| 15 |  | T4                              | 7 | 0.3 (0.8)   | 6  | 1.0 (1.7)   | -0.7 (-2.3 to .8)    | 0.33 |
| 16 |  | Peak FPS – R                    | 9 | 2.7 (4.1)   | 7  | 1.7 (2.1)   | 1.0 (-2.7 to 4.6)    | 0.59 |
| 17 |  |                                 |   |             |    |             |                      |      |
| 18 |  | 2 <sup>nd</sup> Dressing Change |   |             |    |             |                      |      |
| 19 |  | T1                              | 5 | 0.00 (0.00) | 6  | 1.7 (4.1)   | -1.7 (-5.8 to 2.5)   | 0.39 |
| 20 |  | T2                              | 6 | 0.7 (1.6)   | 5  | 2.0 (4.5)   | -1.3 (-5.7 to 3.1)   | 0.51 |
| 21 |  | T3                              | 3 | 0.00 (0.00) | 3  | 1.3 (2.3)   | -1.3 (-5 to 2.4)     | 0.37 |
| 22 |  | T4                              | 3 | 0.00 (0.00) | 3  | 1.3 (2.3)   | -1.3 (-5 to 2.4)     | 0.37 |
| 23 |  | Peak FPS – R                    | 6 | 1.0 (1.7)   | 8  | 1.3 (3.5)   | -0.2 (-3.7 to 3.2)   | 0.88 |
| 24 |  |                                 |   |             |    |             |                      |      |
| 25 |  | 3 <sup>rd</sup> Dressing Change |   |             |    |             |                      |      |
| 26 |  | T1                              | 2 | 0.00 (0.00) | 3  | 3.3 (5.8)   | -3.3 (-17 to 10.4)   | 0.50 |
| 27 |  | T2                              | 2 | 1.0 (1.4)   | 3  | 3.3 (5.8)   | -2.3 (-16.2 to 11.6) | 0.63 |
| 28 |  | T3                              | 2 | 1.0 (1.4)   | 2  | 0.0 (0.0)   | 1.0 (-3.3 to 5.3)    | 0.42 |
| 29 |  | T4                              | 2 | 2.0 (2.8)   | 0  | -           | -                    | -    |
| 30 |  | Peak FPS – R                    | 2 | 3.0 (1.4)   | 3  | 3.3 (5.8)   | -0.3 (-14.2 to 13.6) | 0.94 |
| 31 |  |                                 |   |             |    |             |                      |      |
| 32 |  | <b>Child: VAS</b>               |   |             |    |             |                      |      |
| 33 |  |                                 |   |             |    |             |                      |      |
| 34 |  | 1 <sup>st</sup> Dressing Change |   |             |    |             |                      |      |
| 35 |  | T1                              | 8 | 21.9 (27.5) | 7  | 7.1 (15.0)  | 15 (-11 to 40)       | 0.23 |
| 36 |  | T2                              | 7 | 45.7 (41.6) | 5  | 8.0 (11.0)  | 38 (-5 to 81)        | 0.08 |
| 37 |  | T3                              | 6 | 33.3 (37.8) | 4  | 30.0 (47.6) | 3 (-59 to 65)        | 0.90 |
| 38 |  | T4                              | 5 | 28.0 (25.9) | 4  | 25.0 (50.0) | 3 (-57 to 63)        | 0.91 |
| 39 |  | Peak VAS                        | 8 | 52.5 (41.)  | 6  | 23.3 (40.8) | 29 (-19 to 77)       | 0.21 |
| 40 |  |                                 |   |             |    |             |                      |      |
| 41 |  | 2 <sup>nd</sup> Dressing Change |   |             |    |             |                      |      |
| 42 |  | T1                              | 8 | 16.3 (22.0) | 5  | 4.0 (8.9)   | 12 (-11 to 35)       | 0.27 |
| 43 |  | T2                              | 7 | 27.9 (27.4) | 5  | 4.0 (8.9)   | 24 (-5 to 52)        | 0.09 |
| 44 |  | T3                              | 5 | 16.0 (26.1) | 3  | 6.7 (11.5)  | 9 (-31 to 49)        | 0.59 |
| 45 |  | T4                              | 5 | 12.0 (17.9) | 3  | 0.0 (0.0)   | 12 (-14 to 38)       | 0.30 |
| 46 |  | Peak VAS                        | 8 | 34.4 (31.3) | 7  | 5.7 (9.8)   | 29 (2 to 55)         | 0.04 |
| 47 |  |                                 |   |             |    |             |                      |      |
| 48 |  | 3 <sup>rd</sup> Dressing Change |   |             |    |             |                      |      |
| 49 |  | T1                              | 3 | 8.3 (14.4)  | 2  | 0.0 (0.0)   | 8 (-26 – 43)         | 0.50 |
| 50 |  |                                 |   |             |    |             |                      |      |
| 51 |  |                                 |   |             |    |             |                      |      |
| 52 |  |                                 |   |             |    |             |                      |      |
| 53 |  |                                 |   |             |    |             |                      |      |
| 54 |  |                                 |   |             |    |             |                      |      |
| 55 |  |                                 |   |             |    |             |                      |      |
| 56 |  |                                 |   |             |    |             |                      |      |
| 57 |  |                                 |   |             |    |             |                      |      |
| 58 |  |                                 |   |             |    |             |                      |      |
| 59 |  |                                 |   |             |    |             |                      |      |
| 60 |  |                                 |   |             |    |             |                      |      |

|          |   |             |   |            |                 |        |
|----------|---|-------------|---|------------|-----------------|--------|
| T2       | 3 | 26.7 (25.2) | 2 | 15.0 (7.1) | 12 (-49 to 73)  | 0.58   |
| T3       | 2 | 5.0 (7.1)   | 2 | 5.0 (7.1)  | 0 (-30 to 30)   | > 0.99 |
| T4       | 2 | 20.0 (28.3) | 2 | 0.0 (0.0)  | 20 (-66 to 106) | 0.42   |
| Peak VAS | 2 | 40.0 (14.1) | 2 | 15.0 (7.1) | 25 (-23 to 73)  | 0.15   |

\* Adjusted Mean Difference = Intervention Group – Control Group. FLACC = face, legs, activity, cry, consolability scale; VAS = visual analogue scale; FPS-R = faces pain scale revises; SD = standard deviation; CI = confidence interval; T1 = timepoint 1; T2 = timepoint 2; T3 = timepoint 3; T4 = timepoint 4.

For peer review only



1  
2  
3 **Appendix D. Staff and caregiver perspectives on dressings**  
4  
5  
6

7  
8  
9  
10  
11  
12  
13  
14  
15  
16  
17  
18  
19  
20  
21  
22  
23  
24  
25  
26  
27  
28  
29  
30  
31  
32

| Assessor | Dressing Measure             | Control (PVC film) |             | Intervention (HBD) |             | <i>p</i> value |
|----------|------------------------------|--------------------|-------------|--------------------|-------------|----------------|
|          |                              | N                  | Mean (SD)   | N                  | Mean (SD)   |                |
| ED Staff |                              |                    |             |                    |             |                |
|          | Ease of dressing application | 8                  | 8.00 (1.85) | 15                 | 9.53 (0.99) | 0.056          |
|          | Ease of dressing removal     | 9                  | 9.78 (0.67) | 16                 | 9.88 (0.50) | 0.709          |
|          | Flexibility                  | 9                  | 8.22 (1.99) | 16                 | 9.56 (0.73) | 0.082          |
|          | Conformity                   | 9                  | 7.89 (2.09) | 16                 | 8.44 (1.50) | 0.500          |
| Parents  |                              |                    |             |                    |             |                |
|          | Ease of dressing application | 16                 | 7.63 (2.66) | 24                 | 9.54 (0.88) | 0.013          |
|          | Ease of dressing removal     | 16                 | 8.62 (2.28) | 24                 | 9.88 (0.34) | 0.045          |
|          | Comfort                      | 16                 | 8.19 (2.61) | 24                 | 8.96 (1.88) | 0.318          |
|          | Ease of movement             | 16                 | 7.81 (2.59) | 24                 | 9.29 (1.30) | 0.047          |

33  
34 ED = emergency department; PVC = polyvinylchloride film; HBD = hydrogel burn dressing; N = number of  
35 participants; SD = standard deviation  
36  
37  
38  
39  
40  
41  
42  
43  
44  
45  
46  
47  
48  
49  
50  
51  
52  
53  
54  
55  
56  
57  
58  
59  
60

### Appendix E. Pain score frequencies during acute care in the ED

| Pain Scale and Timepoint    | Pain Score | N (Intervention) | Burnaid® N (%) | N (Control)   | Plastic Wrap N (%) |
|-----------------------------|------------|------------------|----------------|---------------|--------------------|
| <b>FLACC (0 – 10 scale)</b> |            | <i>n</i> = 35    |                | <i>n</i> = 23 |                    |
| T1                          | 0          |                  | 18 (51%)       |               | 16 (70%)           |
|                             | 1          |                  | 9 (26%)        |               | 3 (13%)            |
|                             | 2          |                  | 4 (11%)        |               | 2 (9%)             |
|                             | 3          |                  | 1 (3%)         |               | 1 (4%)             |
|                             | 5          |                  | 1 (3%)         |               | 0 (0%)             |
|                             | 6          |                  | 1 (3%)         |               | 1 (4%)             |
|                             | 10         |                  | 1 (3%)         |               | 0 (0%)             |
| T2                          |            | <i>n</i> = 36    |                | <i>n</i> = 35 |                    |
|                             | 0          |                  | 30 (83%)       |               | 26 (74%)           |
|                             | 1          |                  | 1 (3%)         |               | 5 (14%)            |
|                             | 2          |                  | 3 (8%)         |               | 4 (11%)            |
|                             | 3          |                  | 1 (3%)         |               | 0 (0%)             |
|                             | 4          |                  | 1 (3%)         |               | 0 (0%)             |
| T3                          |            | <i>n</i> = 36    |                | <i>n</i> = 34 |                    |
|                             | 0          |                  | 31 (86%)       |               | 24 (71%)           |
|                             | 1          |                  | 1 (3%)         |               | 5 (15%)            |
|                             | 2          |                  | 2 (6%)         |               | 4 (12%)            |
|                             | 3          |                  | 1 (3%)         |               | 0 (0%)             |
|                             | 6          |                  | 1 (3%)         |               | 0 (0%)             |
|                             | 9          |                  | 0 (0%)         |               | 1 (3%)             |
| T4                          |            | <i>n</i> = 35    |                | <i>n</i> = 33 |                    |
|                             | 0          |                  | 26 (74%)       |               | 24 (73%)           |
|                             | 1          |                  | 2 (6%)         |               | 2 (6%)             |
|                             | 2          |                  | 3 (9%)         |               | 4 (12%)            |
|                             | 3          |                  | 1 (3%)         |               | 1 (3%)             |
|                             | 4          |                  | 2 (6%)         |               | 1 (3%)             |
|                             | 7          |                  | 0 (0%)         |               | 1 (3%)             |
|                             | 8          |                  | 1 (3%)         |               | 0 (0%)             |
|                             | Peak FLACC |                  | <i>n</i> = 36  |               | <i>n</i> = 34      |
| 0                           |            |                  | 5 (14%)        |               | 4 (12%)            |
| 1                           |            |                  | 3 (8%)         |               | 4 (12%)            |
| 2                           |            |                  | 7 (19%)        |               | 3 (9%)             |
| 3                           |            |                  | 6 (17%)        |               | 4 (12%)            |

1  
2  
3  
4  
5  
6  
7  
8  
9  
10  
11  
12  
13  
14  
15  
16  
17  
18  
19  
20  
21  
22  
23  
24  
25  
26  
27  
28  
29  
30  
31  
32  
33  
34  
35  
36  
37  
38  
39  
40  
41  
42  
43  
44  
45  
46  
47  
48  
49  
50  
51  
52  
53  
54  
55  
56  
57  
58  
59  
60

|  |                                     | 4             | 5 (14%)  | 7 (21%)       |
|--|-------------------------------------|---------------|----------|---------------|
|  |                                     | 5             | 2 (6%)   | 2 (6%)        |
|  |                                     | 6             | 3 (8%)   | 4 (12%)       |
|  |                                     | 7             | 2 (6%)   | 1 (3%)        |
|  |                                     | 8             | 3 (8%)   | 3 (9%)        |
|  |                                     | 9             | 0 (0%)   | 1 (3%)        |
|  |                                     | 10            | 0 (0%)   | 1 (3%)        |
|  | <b>Observer VAS (0 – 100 scale)</b> |               |          |               |
|  |                                     | <i>n</i> = 34 |          | <i>n</i> = 22 |
|  | T1                                  | 0             | 9 (26%)  | 4 (18%)       |
|  |                                     | 10            | 3 (9%)   | 3 (14%)       |
|  |                                     | 20            | 4 (12%)  | 1 (5%)        |
|  |                                     | 30            | 4 (12%)  | 3 (14%)       |
|  |                                     | 40            | 4 (12%)  | 6 (27%)       |
|  |                                     | 50            | 0 (0%)   | 4 (18%)       |
|  |                                     | 55            | 1 (3%)   | 0 (0%)        |
|  |                                     | 60            | 4 (12%)  | 0 (0%)        |
|  |                                     | 70            | 3 (9%)   | 0 (0%)        |
|  |                                     | 80            | 1 (3%)   | 1 (5%)        |
|  |                                     | 100           | 1 (3%)   | 0 (0%)        |
|  | T2                                  | <i>n</i> = 34 |          | <i>n</i> = 31 |
|  |                                     | 0             | 14 (41%) | 10 (32%)      |
|  |                                     | 10            | 1 (3%)   | 3 (10%)       |
|  |                                     | 20            | 6 (18%)  | 5 (16%)       |
|  |                                     | 25            | 0 (0%)   | 1 (3%)        |
|  |                                     | 30            | 4 (12%)  | 5 (16%)       |
|  |                                     | 35            | 0 (0%)   | 1 (3%)        |
|  |                                     | 40            | 2 (6%)   | 2 (6%)        |
|  |                                     | 50            | 1 (3%)   | 2 (6%)        |
|  |                                     | 60            | 4 (12%)  | 2 (6%)        |
|  |                                     | 70            | 2 (6%)   | 0 (0%)        |
|  | T3                                  | <i>n</i> = 35 |          | <i>n</i> = 34 |
|  |                                     | 0             | 15 (43%) | 14 (41%)      |
|  |                                     | 10            | 2 (6%)   | 7 (21%)       |
|  |                                     | 20            | 7 (20%)  | 4 (12%)       |
|  |                                     | 30            | 5 (14%)  | 3 (9%)        |
|  |                                     | 40            | 1 (3%)   | 1 (3%)        |
|  |                                     | 50            | 2 (6%)   | 2 (6%)        |
|  |                                     | 60            | 3 (9%)   | 1 (3%)        |

|  |                               |               |               |          |
|--|-------------------------------|---------------|---------------|----------|
|  |                               | 80            | 0 (0%)        | 1 (3%)   |
|  |                               | 100           | 0 (0%)        | 1 (3%)   |
|  | T4                            | <i>n</i> = 33 | <i>n</i> = 32 |          |
|  |                               | 0             | 12 (36%)      | 16 (50%) |
|  |                               | 10            | 2 (6%)        | 4 (13%)  |
|  |                               | 20            | 6 (18%)       | 5 (16%)  |
|  |                               | 30            | 4 (12%)       | 0 (0%)   |
|  |                               | 40            | 1 (3%)        | 1 (3%)   |
|  |                               | 50            | 3 (9%)        | 2 (6%)   |
|  |                               | 60            | 4 (12%)       | 2 (6%)   |
|  |                               | 70            | 0 (0%)        | 1 (3%)   |
|  |                               | 100           | 1 (3%)        | 1 (3%)   |
|  | <b>FPS – R (0 – 10 scale)</b> | <i>n</i> = 9  | <i>n</i> = 7  |          |
|  | T1                            |               |               |          |
|  |                               | 0             | 4 (44%)       | 1 (14%)  |
|  |                               | 2             | 0 (0%)        | 2 (29%)  |
|  |                               | 4             | 3 (33%)       | 2 (29%)  |
|  |                               | 5             | 0 (0%)        | 1 (14%)  |
|  |                               | 8             | 1 (11%)       | 1 (14%)  |
|  |                               | 10            | 1 (11%)       | 0 (0%)   |
|  | T2                            | <i>n</i> = 10 | <i>n</i> = 9  |          |
|  |                               | 0             | 6 (60%)       | 4 (44%)  |
|  |                               | 2             | 1 (10%)       | 2 (22%)  |
|  |                               | 4             | 0 (0%)        | 1 (11%)  |
|  |                               | 6             | 1 (10%)       | 1 (11%)  |
|  |                               | 8             | 0 (0%)        | 1 (11%)  |
|  |                               | 10            | 2 (20%)       | 0 (0%)   |
|  | T3                            | <i>n</i> = 11 | <i>n</i> = 11 |          |
|  |                               | 0             | 8 (73%)       | 9 (82%)  |
|  |                               | 1             | 1 (9%)        | 0 (0%)   |
|  |                               | 4             | 0 (0%)        | 1 (9%)   |
|  |                               | 6             | 1 (9%)        | 0 (0%)   |
|  |                               | 10            | 1 (9%)        | 1 (9%)   |
|  | T4                            | <i>n</i> = 10 | <i>n</i> = 10 |          |
|  |                               | 0             | 4 (40%)       | 5 (50%)  |
|  |                               | 1             | 1 (10%)       | 0 (0%)   |
|  |                               | 2             | 1 (10%)       | 2 (20%)  |
|  |                               | 4             | 1 (10%)       | 0 (0%)   |

1  
2  
3  
4  
5  
6  
7  
8  
9  
10  
11  
12  
13  
14  
15  
16  
17  
18  
19  
20  
21  
22  
23  
24  
25  
26  
27  
28  
29  
30  
31  
32  
33  
34  
35  
36  
37  
38  
39  
40  
41  
42  
43  
44  
45  
46  
47  
48  
49  
50  
51  
52  
53  
54  
55  
56  
57  
58  
59  
60

|                                              |    |               |         |              |
|----------------------------------------------|----|---------------|---------|--------------|
|                                              | 6  |               | 2 (20%) | 1 (10%)      |
|                                              | 10 |               | 1 (10%) | 2 (20%)      |
| <b>Child Self-report VAS (0 – 100 scale)</b> |    | <i>n</i> = 9  |         | <i>n</i> = 2 |
| T1                                           | 0  |               | 2 (22%) | 0 (0%)       |
|                                              | 10 |               | 0 (0%)  | 1 (50%)      |
|                                              | 20 |               | 1 (11%) | 0 (0%)       |
|                                              | 30 |               | 1 (11%) | 1 (50%)      |
|                                              | 40 |               | 1 (11%) | 0 (0%)       |
|                                              | 50 |               | 2 (22%) | 0 (0%)       |
|                                              | 70 |               | 1 (11%) | 0 (0%)       |
|                                              | 85 |               | 1 (11%) | 0 (0%)       |
| T2                                           |    | <i>n</i> = 10 |         | <i>n</i> = 4 |
|                                              | 0  |               | 4 (40%) | 1 (25%)      |
|                                              | 10 |               | 0 (0%)  | 1 (25%)      |
|                                              | 20 |               | 3 (30%) | 1 (25%)      |
|                                              | 30 |               | 1 (10%) | 0 (0%)       |
|                                              | 50 |               | 1 (10%) | 0 (0%)       |
|                                              | 60 |               | 1 (10%) | 0 (0%)       |
|                                              | 80 |               | 0 (0%)  | 1 (25%)      |
| T3                                           |    | <i>n</i> = 11 |         | <i>n</i> = 5 |
|                                              | 0  |               | 5 (45%) | 4 (80%)      |
|                                              | 10 |               | 1 (9%)  | 0 (0%)       |
|                                              | 20 |               | 3 (27%) | 0 (0%)       |
|                                              | 40 |               | 0 (0%)  | 1 (20%)      |
|                                              | 50 |               | 1 (9%)  | 0 (0%)       |
|                                              | 60 |               | 1 (9%)  | 0 (0%)       |
| T4                                           |    | <i>n</i> = 7  |         | <i>n</i> = 4 |
|                                              | 0  |               | 2 (29%) | 2 (50%)      |
|                                              | 10 |               | 0 (0%)  | 1 (25%)      |
|                                              | 20 |               | 1 (14%) | 0 (0%)       |
|                                              | 40 |               | 2 (29%) | 0 (0%)       |
|                                              | 55 |               | 1 (14%) | 0 (0%)       |
|                                              | 60 |               | 1 (14%) | 0 (0%)       |
|                                              | 90 |               | 0 (0%)  | 1 (25%)      |

N = number of participants; FLACC = face, legs, activity, cry, consolability scale; VAS = visual analogue scale; FPS-R = faces pain scale revises; Ag = silver dressing; T1 = timepoint 1; T2 = timepoint 2; T3 = timepoint 3; T4 = timepoint 4.

1  
2  
3  
4  
5  
6  
7  
8  
9  
10  
11  
12  
13  
14  
15  
16  
17  
18  
19  
20  
21  
22  
23  
24  
25  
26  
27  
28  
29  
30  
31  
32  
33  
34  
35  
36  
37  
38  
39  
40  
41  
42  
43  
44  
45  
46  
47  
48  
49  
50  
51  
52  
53  
54  
55  
56  
57  
58  
59  
60

## CONSORT Reporting Checklist for Randomised Trials

|                           | Reporting Item                                                                                                                                                                    | Page Number    |
|---------------------------|-----------------------------------------------------------------------------------------------------------------------------------------------------------------------------------|----------------|
| <b>Title and Abstract</b> |                                                                                                                                                                                   |                |
| Title                     | <a href="#">#1a</a> Identification as a randomized trial in the title.                                                                                                            | 0 (Title Page) |
| Abstract                  | <a href="#">#1b</a> Structured summary of trial design, methods, results, and conclusions                                                                                         | 1 - 2          |
| <b>Introduction</b>       |                                                                                                                                                                                   |                |
| Background and objectives | <a href="#">#2a</a> Scientific background and explanation of rationale                                                                                                            | 3 - 4          |
| Background and objectives | <a href="#">#2b</a> Specific objectives or hypothesis                                                                                                                             | 3 - 4          |
| <b>Methods</b>            |                                                                                                                                                                                   |                |
| Trial design              | <a href="#">#3a</a> Description of trial design (such as parallel, factorial) including allocation ratio.                                                                         | 4              |
| Trial design              | <a href="#">#3b</a> Important changes to methods after trial commencement (such as eligibility criteria), with reasons                                                            | 8              |
| Participants              | <a href="#">#4a</a> Eligibility criteria for participants                                                                                                                         | 5              |
| Participants              | <a href="#">#4b</a> Settings and locations where the data were collected                                                                                                          | 4              |
| Interventions             | <a href="#">#5</a> The experimental and control interventions for each group with sufficient details to allow replication, including how and when they were actually administered | 5 - 7          |
| Outcomes                  | <a href="#">#6a</a> Completely defined prespecified primary and secondary outcome measures, including how and when they were assessed                                             | 7 - 9          |
| Outcomes                  | <a href="#">#6b</a> Any changes to trial outcomes after the trial commenced, with reasons                                                                                         | NA             |
| Sample size               | <a href="#">#7a</a> How sample size was determined.                                                                                                                               | 9              |

|    |                          |                      |                                                                                     |         |
|----|--------------------------|----------------------|-------------------------------------------------------------------------------------|---------|
| 1  | Sample size              | <a href="#">#7b</a>  | When applicable, explanation of any interim analyses and stopping guidelines        | NA      |
| 2  |                          |                      |                                                                                     |         |
| 3  |                          |                      |                                                                                     |         |
| 4  |                          |                      |                                                                                     |         |
| 5  | Randomization -          | <a href="#">#8a</a>  | Method used to generate the random allocation sequence.                             | 5 - 6   |
| 6  | Sequence generation      |                      |                                                                                     |         |
| 7  |                          |                      |                                                                                     |         |
| 8  |                          |                      |                                                                                     |         |
| 9  | Randomization -          | <a href="#">#8b</a>  | Type of randomization; details of any restriction (such as blocking and block size) | NA      |
| 10 | Sequence generation      |                      |                                                                                     |         |
| 11 |                          |                      |                                                                                     |         |
| 12 |                          |                      |                                                                                     |         |
| 13 | Randomization -          | <a href="#">#9</a>   | Mechanism used to implement the random allocation                                   | 5 - 6   |
| 14 | Allocation concealment   |                      | sequence (such as sequentially numbered containers),                                |         |
| 15 | mechanism                |                      | describing any steps taken to conceal the sequence until                            |         |
| 16 |                          |                      | interventions were assigned                                                         |         |
| 17 |                          |                      |                                                                                     |         |
| 18 |                          |                      |                                                                                     |         |
| 19 |                          |                      |                                                                                     |         |
| 20 | Randomization -          | <a href="#">#10</a>  | Who generated the allocation sequence, who enrolled                                 | 5 - 6   |
| 21 | Implementation           |                      | participants, and who assigned participants to interventions                        |         |
| 22 |                          |                      |                                                                                     |         |
| 23 |                          |                      |                                                                                     |         |
| 24 | Blinding                 | <a href="#">#11a</a> | If done, who was blinded after assignment to interventions                          | 5 - 6   |
| 25 |                          |                      | (for example, participants, care providers, those assessing                         |         |
| 26 |                          |                      | outcomes) and how.                                                                  |         |
| 27 |                          |                      |                                                                                     |         |
| 28 |                          |                      |                                                                                     |         |
| 29 |                          |                      |                                                                                     |         |
| 30 | Blinding                 | <a href="#">#11b</a> | If relevant, description of the similarity of interventions                         | 3       |
| 31 |                          |                      |                                                                                     |         |
| 32 | Statistical methods      | <a href="#">#12a</a> | Statistical methods used to compare groups for primary and                          | 9 - 10  |
| 33 |                          |                      | secondary outcomes                                                                  |         |
| 34 |                          |                      |                                                                                     |         |
| 35 |                          |                      |                                                                                     |         |
| 36 | Statistical methods      | <a href="#">#12b</a> | Methods for additional analyses, such as subgroup analyses                          | 10      |
| 37 |                          |                      | and adjusted analyses                                                               |         |
| 38 |                          |                      |                                                                                     |         |
| 39 |                          |                      |                                                                                     |         |
| 40 | <b>Results</b>           |                      |                                                                                     |         |
| 41 |                          |                      |                                                                                     |         |
| 42 | Participant flow diagram | <a href="#">#13a</a> | For each group, the numbers of participants who were                                | 5       |
| 43 | (strongly recommended)   |                      | randomly assigned, received intended treatment, and were                            |         |
| 44 |                          |                      | analysed for the primary outcome                                                    |         |
| 45 |                          |                      |                                                                                     |         |
| 46 |                          |                      |                                                                                     |         |
| 47 |                          |                      |                                                                                     |         |
| 48 | Participant flow         | <a href="#">#13b</a> | For each group, losses and exclusions after randomization,                          | 5       |
| 49 |                          |                      | together with reason                                                                |         |
| 50 |                          |                      |                                                                                     |         |
| 51 |                          |                      |                                                                                     |         |
| 52 | Recruitment              | <a href="#">#14a</a> | Dates defining the periods of recruitment and follow-up                             | 4       |
| 53 |                          |                      |                                                                                     |         |
| 54 | Recruitment              | <a href="#">#14b</a> | Why the trial ended or was stopped                                                  | NA      |
| 55 |                          |                      |                                                                                     |         |
| 56 |                          |                      |                                                                                     |         |
| 57 | Baseline data            | <a href="#">#15</a>  | A table showing baseline demographic and clinical                                   | 11 - 13 |
| 58 |                          |                      | characteristics for each group                                                      |         |
| 59 |                          |                      |                                                                                     |         |
| 60 |                          |                      |                                                                                     |         |

|    |                          |                      |                                                                 |         |
|----|--------------------------|----------------------|-----------------------------------------------------------------|---------|
| 1  | Numbers analysed         | <a href="#">#16</a>  | For each group, number of participants (denominator)            | 11 - 18 |
| 2  |                          |                      | included in each analysis and whether the analysis was by       |         |
| 3  |                          |                      | original assigned groups                                        |         |
| 4  |                          |                      |                                                                 |         |
| 5  |                          |                      |                                                                 |         |
| 6  | Outcomes and estimation  | <a href="#">#17a</a> | For each primary and secondary outcome, results for each        | 14 – 18 |
| 7  |                          |                      | group, and the estimated effect size and its precision (such as |         |
| 8  |                          |                      | 95% confidence interval)                                        |         |
| 9  |                          |                      |                                                                 |         |
| 10 |                          |                      |                                                                 |         |
| 11 |                          |                      |                                                                 |         |
| 12 | Outcomes and estimation  | <a href="#">#17b</a> | For binary outcomes, presentation of both absolute and          | NA      |
| 13 |                          |                      | relative effect sizes is recommended                            |         |
| 14 |                          |                      |                                                                 |         |
| 15 |                          |                      |                                                                 |         |
| 16 | Ancillary analyses       | <a href="#">#18</a>  | Results of any other analyses performed, including subgroup     | 15 - 18 |
| 17 |                          |                      | analyses and adjusted analyses, distinguishing pre-specified    |         |
| 18 |                          |                      | from exploratory                                                |         |
| 19 |                          |                      |                                                                 |         |
| 20 |                          |                      |                                                                 |         |
| 21 | Harms                    | <a href="#">#19</a>  | All important harms or unintended effects in each group (For    | 13      |
| 22 |                          |                      | specific guidance see CONSORT for harms)                        |         |
| 23 |                          |                      |                                                                 |         |
| 24 |                          |                      |                                                                 |         |
| 25 |                          |                      |                                                                 |         |
| 26 | <b>Discussion</b>        |                      |                                                                 |         |
| 27 |                          |                      |                                                                 |         |
| 28 | Limitations              | <a href="#">#20</a>  | Trial limitations, addressing sources of potential bias,        | 19      |
| 29 |                          |                      | imprecision, and, if relevant, multiplicity of analyses         |         |
| 30 |                          |                      |                                                                 |         |
| 31 |                          |                      |                                                                 |         |
| 32 | Interpretation           | <a href="#">#22</a>  | Interpretation consistent with results, balancing benefits and  | 19 – 20 |
| 33 |                          |                      | harms, and considering other relevant evidence                  |         |
| 34 |                          |                      |                                                                 |         |
| 35 |                          |                      |                                                                 |         |
| 36 | Registration             | <a href="#">#23</a>  | Registration number and name of trial registry                  | 4       |
| 37 |                          |                      |                                                                 |         |
| 38 |                          |                      |                                                                 |         |
| 39 | <b>Other Information</b> |                      |                                                                 |         |
| 40 |                          |                      |                                                                 |         |
| 41 | Protocol                 | <a href="#">#24</a>  | Where the full trial protocol can be accessed, if available     | 4       |
| 42 |                          |                      |                                                                 |         |
| 43 | Funding                  | <a href="#">#25</a>  | Sources of funding and other support (such as supply of         | 24      |
| 44 |                          |                      | drugs), role of funders                                         |         |
| 45 |                          |                      |                                                                 |         |
| 46 |                          |                      |                                                                 |         |

47 Based on the CONSORT guidelines

48  
49 Schulz KF, Altman DG, Moher D, for the CONSORT Group. CONSORT 2010 Statement: updated guidelines for  
50 reporting parallel group randomised trials  
51  
52



# BMJ Open

## Effectiveness of a hydrogel dressing as an analgesic adjunct to first aid for the treatment of acute paediatric burn injuries: A prospective randomised controlled trial

|                                 |                                                                                                                                                                                                                                                                                                                                                                                                                                                                                                                                                                                                                                     |
|---------------------------------|-------------------------------------------------------------------------------------------------------------------------------------------------------------------------------------------------------------------------------------------------------------------------------------------------------------------------------------------------------------------------------------------------------------------------------------------------------------------------------------------------------------------------------------------------------------------------------------------------------------------------------------|
| Journal:                        | <i>BMJ Open</i>                                                                                                                                                                                                                                                                                                                                                                                                                                                                                                                                                                                                                     |
| Manuscript ID                   | bmjopen-2020-039981.R2                                                                                                                                                                                                                                                                                                                                                                                                                                                                                                                                                                                                              |
| Article Type:                   | Original research                                                                                                                                                                                                                                                                                                                                                                                                                                                                                                                                                                                                                   |
| Date Submitted by the Author:   | 13-Nov-2020                                                                                                                                                                                                                                                                                                                                                                                                                                                                                                                                                                                                                         |
| Complete List of Authors:       | Holbert, Maleea; Queensland Health Centre for Children's Health Research, Centre for Children's Burns and Trauma Research; The University of Queensland Faculty of Medicine<br>Kimble, Roy; Queensland Health Centre for Children's Health Research, Centre for Children's Burns and Trauma Research; The University of Queensland Faculty of Medicine<br>Chatfield, Mark; The University of Queensland Faculty of Medicine<br>Griffin, Bronwyn; Queensland Health Centre for Children's Health Research, Centre for Children's Burns and Trauma Research; Queensland University of Technology Faculty of Health, School of Nursing |
| <b>Primary Subject Heading</b>: | Paediatrics                                                                                                                                                                                                                                                                                                                                                                                                                                                                                                                                                                                                                         |
| Secondary Subject Heading:      | Emergency medicine, Anaesthesia                                                                                                                                                                                                                                                                                                                                                                                                                                                                                                                                                                                                     |
| Keywords:                       | PAEDIATRICS, PAIN MANAGEMENT, ACCIDENT & EMERGENCY MEDICINE, WOUND MANAGEMENT                                                                                                                                                                                                                                                                                                                                                                                                                                                                                                                                                       |
|                                 |                                                                                                                                                                                                                                                                                                                                                                                                                                                                                                                                                                                                                                     |

SCHOLARONE™  
Manuscripts



I, the Submitting Author has the right to grant and does grant on behalf of all authors of the Work (as defined in the below author licence), an exclusive licence and/or a non-exclusive licence for contributions from authors who are: i) UK Crown employees; ii) where BMJ has agreed a CC-BY licence shall apply, and/or iii) in accordance with the terms applicable for US Federal Government officers or employees acting as part of their official duties; on a worldwide, perpetual, irrevocable, royalty-free basis to BMJ Publishing Group Ltd ("BMJ") its licensees and where the relevant Journal is co-owned by BMJ to the co-owners of the Journal, to publish the Work in this journal and any other BMJ products and to exploit all rights, as set out in our [licence](#).

The Submitting Author accepts and understands that any supply made under these terms is made by BMJ to the Submitting Author unless you are acting as an employee on behalf of your employer or a postgraduate student of an affiliated institution which is paying any applicable article publishing charge ("APC") for Open Access articles. Where the Submitting Author wishes to make the Work available on an Open Access basis (and intends to pay the relevant APC), the terms of reuse of such Open Access shall be governed by a Creative Commons licence – details of these licences and which [Creative Commons](#) licence will apply to this Work are set out in our licence referred to above.

Other than as permitted in any relevant BMJ Author's Self Archiving Policies, I confirm this Work has not been accepted for publication elsewhere, is not being considered for publication elsewhere and does not duplicate material already published. I confirm all authors consent to publication of this Work and authorise the granting of this licence.

**Title**

Effectiveness of a hydrogel dressing as an analgesic adjunct to first aid for the treatment of acute paediatric burn injuries: A prospective randomised controlled trial

**Authors**

Maleea D. Holbert<sup>1,2,3</sup>, Roy M. Kimble<sup>1,2,3,4</sup>, Mark D. Chatfield<sup>3</sup>, Bronwyn R. Griffin<sup>1,2,4,5</sup>

**Affiliations**

<sup>1</sup> Centre for Children's Burns and Trauma Research, Centre for Children's Health Research, South Brisbane, Queensland, Australia 4101

<sup>2</sup> Pegg Leditschke Paediatric Burns Centre, The Queensland Children's Hospital, South Brisbane, Queensland, Australia 4101

<sup>3</sup> Faculty of Medicine, The University of Queensland, Brisbane, Queensland, Australia 4072

<sup>4</sup> Faculty of Health, School of Nursing, Queensland University of Technology, Brisbane, Queensland, Australia 4059

<sup>5</sup> Institute of Health and Biomedical Innovation, Queensland University of Technology, Brisbane, Queensland, Australia 4059

**Corresponding author:**

Maleea D. Holbert: [m.holbert@uq.edu.au](mailto:m.holbert@uq.edu.au)

Centre for Children's Burns and Trauma Research, Level 7 Centre for Children's Health Research, 62 Graham Street, South Brisbane, QLD 4101, Australia.

Telephone: +61 3069 7433

**Co-authors' email addresses**

Roy Kimble: [royk@uq.edu.au](mailto:royk@uq.edu.au)

Mark Chatfield: [m.chatfield@uq.edu.au](mailto:m.chatfield@uq.edu.au)

Bronwyn Griffin: [b.griffin@uq.edu.au](mailto:b.griffin@uq.edu.au)

## Abstract

### *Objective*

To compare the effectiveness of two acute burn dressings, Burnaid® hydrogel dressing and plasticised polyvinylchloride film, on reducing acute pain scores in paediatric burn patients following appropriate first aid.

### *Design*

Single-centre, superiority, two-arm, parallel-group, prospective randomised controlled trial.

### *Participants and Setting*

Paediatric patients (aged  $\leq 16$ ) presenting to the Emergency Department at the Queensland Children's Hospital, Brisbane, Australia, with an acute thermal burn were approached for participation in the trial from September 2017 – September 2018.

### *Interventions*

Patients were randomised to receive either (1) Burnaid® hydrogel dressing (Intervention) or (2) plasticised polyvinylchloride film (Control) as an acute burn dressing.

### *Primary and Secondary Outcomes*

Observational pain scores from nursing staff assessed 5-minutes post-application of the randomised dressing, measured using the Face Legs Activity Cry and Consolability Scale was the primary outcome. Repeated measures of pain, stress, and re-epithelialisation were also collected at follow-up dressing changes until 95% wound re-epithelialisation occurred.

### *Results*

Seventy-two children were recruited and randomised ( $n = 37$  Intervention;  $n = 35$  Control). No significant between-group differences in nursing (Mean Difference:  $-0.1$ , 95% CI:  $-0.7$  to  $0.5$ ,  $p = 0.72$ ) or caregiver (MD:  $1$ , 95% CI:  $-8$  to  $11$ ,  $p = 0.78$ ) observational pain scores were identified. Moreover, no significant differences in child self-report pain (MD:  $0.3$ , 95% CI:  $-1.7$  to  $2.2$ ,  $p = 0.78$ ), heart rate (MD:  $-3$ , 95% CI:  $-11$  to  $5$ ,  $p = 0.41$ ), temperature, (MD:  $0.6$ , 95% CI:  $-0.13$  to  $0.24$ ,  $p = 0.53$ ), stress (Geometric Mean Ratio:  $1.53$ , 95% CI:  $0.93$  to  $2.53$ ,  $p = 0.10$ ), or re-epithelialisation rates (MD:  $-1$ , 95% CI:  $-3$  to  $1$ ,  $p = 0.26$ ) were identified between the two groups.

## Conclusions

A clear benefit of Burnaid® hydrogel dressing as an analgesic adjunct to first aid for the treatment of acute paediatric burns was not identified in this investigation.

## Trial Registration

Australia and New Zealand Clinical Trials Register (ACTRN): ACTRN12617001274369

## Article Summary

### *Strengths and limitations of this study*

- First randomised controlled trial investigating analgesic properties of acute burn dressings in a paediatric burn population
- Pain was assessed using age-specific and reliable self-report and observational scales, in addition to physiological measures of pain and distress.
- This investigation was pragmatic in nature, replicating real-world clinical scenarios where acute burn dressings are used.
- Lack of representativeness within the patient sample (small to medium sized burns in children aged between 0 – 5 years) may limit generalisability of the findings to the broader paediatric burn population.

### *Key Words*

Burns, Paediatric Emergency Medicine, Randomised Controlled Trial, Pain

## 1. Introduction

Pain remains a major issue following a burn, and research suggests that pain from burn injuries continues to be undertreated in children [1]. The subsequent wound care required to treat a burn is also associated with significant pain and distress – thus burn pain comprises a challenging spectrum of acute, background, breakthrough, and procedural pain [2, 3]. The aim of this trial was to provide health practitioners with evidence to support the use of an acute burn dressing that is superior in terms of pain relief for paediatric patients with acute thermal burn injuries. Optimising pain management for paediatric burn patients is more than just a compassionate need to reduce suffering – despite that being a sufficient motivator for health care professionals. Improving acute pain control for children with traumatic injuries such as a burn is critical, as suboptimal analgesia can prolong wound re-epithelialisation [4, 5]. Moreover, adverse and uncontrolled pain can have long-term emotional consequences [6, 7] and influence pain perception and processing later in life [8, 9].

Topical administration of cool running water (CRW) for 20 minutes within 3 hours of the burn occurring is the recommended gold standard first aid for burn injuries, in accordance with the Australian and New Zealand Burn Association [10-14]. Following first aid, guidelines recommend burn wounds to be covered with a sterile dressing to maintain a moist wound environment, minimise the risk of infection, and prevent air exposure – as this can be quite painful for patients with acute burns [15]. Characteristics of an ideal acute burn dressing include a transparent non-adherent design, easy application and removal, and protection from environmental exposure. Plasticised polyvinylchloride (PVC) film fulfils this criteria, and excluding the application to facial burns, is an inexpensive and practical dressing for acute burn injuries in the prehospital and Emergency Department (ED) setting. For this reason, PVC film has been used in the management of acute burns for over four decades. However, the preferred acute burn dressing varies between prehospital services in different states and countries.

Over the past decade, Burnaid® hydrogel dressings have gained widespread use in the prehospital setting for acute burn injuries – and are promoted as providing hydration to the burn wound and pain relief via a convection and evaporative cooling effect [16]. Burnaid® dressings comprise of a 3mm thick sterile polyester urethane foam pad impregnated with a propylene glycol gel, which contains more than 90% purified water. Despite its popularity amongst prehospital services, there is limited empirical evidence for the effectiveness

1  
2 of hydrogel burn dressings, and no studies have been conducted in a paediatric burn population. At present,  
3  
4 there is no robust empirical evidence to support the adoption of one particular acute burn dressing over the  
5  
6 others. With the continual development of expensive wound care products, it is important that we validate  
7  
8 their use and effectiveness within the targeted clinical population. This trial examined the effectiveness of  
9  
10 Burnaid® hydrogel dressings as an analgesic adjunct to first aid for the treatment of acute paediatric burns in  
11  
12 comparison to current standard practice – PVC film. While PVC film offers protection from the external  
13  
14 environment, Burnaid® dressings provide evaporative cooling and a significant reduction in sub-dermal  
15  
16 temperatures when air currents pass over the dressing [17]. This evaporative cooling effect, which is specific  
17  
18 to hydrogel dressings, was the expected benefit of Burnaid® in comparison to PVC film. This evaporative  
19  
20 cooling effect was also why Burnaid® dressings were hypothesised to provide superior pain relief compared  
21  
22 to the current standard acute burn dressing.  
23  
24

## 26 **2. Methods**

### 27 *2.1 Design and setting*

28  
29 We conducted a prospective, single-centre, superiority, randomised controlled trial (RCT) examining the  
30  
31 effectiveness of a hydrogel dressing as an analgesic adjunct to first aid for the treatment of acute paediatric  
32  
33 burn injuries, compared to current standard care. We used a two-arm parallel design with a 1:1 allocation  
34  
35 ratio. Participants were recruited between September 2017 – September 2018 from the ED and the Pegg  
36  
37 Leditschke Children's Burns Outpatient Department (OPD) at the Queensland Children's Hospital (QCH)  
38  
39 following initial presentation for their burn. The QCH serves as the major burns referral centre for  
40  
41 Queensland and Northern New South Wales, treating over 1200 paediatric patients with burn injuries per  
42  
43 annum.  
44  
45  
46

### 47 *2.2 Patient and public involvement*

48  
49 Patients and/or the public were not involved in the development of this research. However, relevant  
50  
51 stakeholders and knowledge users (i.e. prehospital staff, clinicians, and nurses) were involved in the initial  
52  
53 development of the trial, refinement of research questions, and identification of current knowledge gaps.  
54  
55  
56  
57  
58  
59  
60

### 2.3 Protocol and registration

This trial received ethics approval from The Queensland Children's Health Service Human Research Ethics Committee (approval number: HREC/16/QRCH/322) and The University of Queensland Ethics Committee (clearance number: 2017000979). Study methodology was documented in a published protocol [18] and registered with the Australian New Zealand Clinical Trials Registry (ID number: ACTRN12617001274369) on the 5<sup>th</sup> September 2017 prior to recruitment. This trial was completed as per the published protocol [18], which contains a more in-depth description of the trial's design and methods.

### 2.4 Participants

#### 2.4.1 Inclusion criteria

Inclusion criteria: children aged between 0 – 16 years with an acute thermal burn < 20% of the child's total body surface area (TBSA), presented to the ED or Burns OPD within 24 hours of sustaining the burn, received optimal first aid, and no definitive silver dressings or silver sulphadiazine cream applied prior to enrolment.

#### 2.4.2 Exclusion criteria

Exclusion criteria included: children with non-thermal burns or inhalation injuries, presented to the QCH more than 24-hours post-burn, inadequate first aid, prior treatment with silver wound products, non-English speaking, cognitive impairments, required ventilation or initial debridement under general anaesthetic, current involvement with Department of Communities, known sensitivity to hydrogels, and patients with comorbidities that could impair wound healing or exacerbate/alter pain (i.e. metabolic congenital disorders, spinal cord defects/injuries, insensate patients).

**[INSERT Figure 1. CONSORT Flow Diagram]**

### 2.5 Procedures

Participant enrolment and intervention allocation are described above in *Figure 1*. All participants (if age appropriate) and caregivers were given verbal and written information about the research, and provided signed consent to participate in the trial. After obtaining informed consent, participants were stratified by pain risk (1. High Pain or 2. Low Pain) according to factors that could influence pain in paediatric burn patients. Factors were based on findings from a retrospective review of data from the Queensland Paediatric



1  
2 Burns Registry (unpublished hospital quality review). Participants presenting to the ED or Burns OPD with  
3  
4 one or more of the following criteria were considered at high pain risk: unilateral or bilateral foot burns,  
5  
6 campfire/hot coal burns, circumferential burn injuries, and burns >5% TBSA. Following stratification,  
7  
8 patients were randomised to receive either (1) Burnaid® hydrogel dressing (Intervention) or (2) PVC film  
9  
10 (Control). A computerised random number sequence-generating program was used for participant  
11  
12 randomisation. Concealment of treatment allocation were performed via the use of sealed, opaque, identical,  
13  
14 consecutively numbered envelopes prepared in advance by an independent third-party.  
15  
16

17  
18 Due to the pragmatic nature of this trial, researchers could not be blinded to which randomised dressing  
19  
20 patients received. Researchers were required to be present when the acute burn dressings were applied and  
21  
22 removed to obtain pain scores and additional outcome measures from the child, caregiver, and medical staff.  
23  
24 Treating clinicians, nursing staff, patients, and caregivers were also not blinded to which treatment  
25  
26 participants received as dressings were visible on the patient's burn. Because these dressings are topical,  
27  
28 concealment during patient treatment in the ED was not possible. To include an element of blinding in the  
29  
30 trial, a specialist panel of burn surgeons and senior nurses performed a blinded review of 3D wound images  
31  
32 to determine rate of re-epithelialisation at each dressing change until > 95% burn re-epithelialisation  
33  
34 occurred.  
35  
36

37 **[INSERT Figure 2. Pain assessment timepoints during acute and follow up care]**  
38

39  
40 Pain was assessed in the ED (*Figure 2A*) at four timepoints relative to the child's acute treatment for their  
41  
42 burn: (T1) Pre-randomised dressing application, (T2) Post-randomised dressing application, (T3) Pre-  
43  
44 definitive dressing application, and (T4) Post-definitive dressing application. Peak pain during wound  
45  
46 cleaning and debridement was also collected from nursing staff using the FLACC, aiming to capture the  
47  
48 worst/maximal pain experienced during acute treatment. During subsequent dressing changes in the Burns  
49  
50 OPD (*Figure 2B*), pain was assessed at four time points relative to the child's follow up treatment: (T1) Pre-  
51  
52 definitive-dressing removal, (T2) Post-definitive dressing removal, (T3) Pre-definitive dressing application,  
53  
54 (T4) Post-definitive dressing application. Peak pain during wound cleaning was also documented during  
55  
56 dressing changes. Observational pain scores from ED nursing staff assessed post-application of the  
57  
58 randomised dressings (T2 in *Figure 2A*) was the primary outcome measure of the trial. Pain at T2 was  
59  
60

1  
2 assessed five minutes after the application of the randomised dressings for all participants – to give the  
3  
4 dressings a standard period of time on the wound before pain assessment.  
5

6  
7 Randomised dressings were left in place for 20-minutes. This time duration was chosen as the standardised  
8  
9 time for dressings to be applied in the ED for two reasons. First, this duration was predicted to be the time  
10  
11 taken from patient presentation to surgical assessment in the ED – prior to wound debridement and definitive  
12  
13 dressing application. This time duration was discussed with key stakeholders and relevant knowledge users  
14  
15 (such as ED consultants, surgical consultants, and nursing staff) prior to recruitment and data collection for  
16  
17 the trial. Second, 20-minutes has previously been used as the standardised time duration for the application  
18  
19 of Burnaid® dressings in a burn porcine model [17]. As little-to-no research has been conducted examining  
20  
21 acute burn dressings in a paediatric ED setting, and Burnaid® dressings do not provide a minimum duration  
22  
23 for dressing application, 20-minutes was used as a standardised duration to ensure consistency between  
24  
25 participants.  
26

27  
28  
29 Additional measures collected at each of the eight aforementioned timepoints during the child's acute and  
30  
31 follow up care included: a saliva sample (to measure biomarkers of stress), heart rate, and temperature. The  
32  
33 duration of each burn care procedure was timed in the ED and Burns OPD. Information regarding analgesic  
34  
35 medication administered to the patient prior to enrolment in the trial was obtained from Ambulance chart  
36  
37 records and referral notes. All medication administered to patients following presentation to the QCH was  
38  
39 recorded, in addition to all non-pharmacological interventions such as distraction techniques, rewards,  
40  
41 procedural preparation, and music/behavioural therapies.  
42

## 43 44 2.6 Interventions

### 45 46 2.6.1 Intervention – Burnaid® hydrogel dressing

47  
48 Burnaid® hydrogel dressing (Mundicare®, Sydney, Australia) served as the treatment intervention in this trial.  
49  
50 Burnaid® products previously contained *Melaleuca Alternifolia* (tea tree) for its broad-spectrum antimicrobial  
51  
52 properties, however inclusion of this active ingredient has since ceased and no tea tree containing Burnaid®  
53  
54 products were used in this investigation.  
55  
56  
57  
58  
59  
60

## 2.6.2 Control – Plasticised polyvinylchloride film

Plasticised PVC film (also known as plastic wrap, cling film, and Saran™ wrap) is a thin (< 25µm) food-wrap that has been used in the management of acute burn injuries for over four decades [19, 20].

## 2.7 Measurements

### 2.7.1 Primary outcome measure

Observational pain scores from ED nursing staff was the primary outcome measure of the trial, and was assessed using the Face, Legs, Activity, Cry and Consolability (FLACC) scale. The FLACC scale is a five-item composite tool measuring aspects of both pain and distress in children. The scale consists of five categories of behaviour, each of which are scored on a 0 to 2-point scale, giving a total score ranging from 0 to 10 [21]. The FLACC has been described in the literature as a reliable and well-validated pain assessment tool for postoperative pain in patients age between 0 – 7, and has shown correlations with child self-report pain measures [22, 23]. This pain scale was chosen to be the primary outcome measure for the trial based on the low median age range of patients presenting to the QCH with a burn. Whilst self-report pain measures are acknowledged to be the gold standard – a significant proportion of patients presenting to the ED for acute burn treatment are pre-verbal and thus unable to self-report their pain.

### 2.7.2 Additional Measures of Pain

#### 2.7.2.1 Child self-report (ages 4 – 8 years)

Child self-report pain scores were assessed using the Faces Pain Scale – Revised (FPS – R). The FPS – R is a linear self-report scale designed for pain assessment in children over the age of four [24, 25]. The item is composed of six-points (six-faces with differing expressions) with a lower anchor of *no pain* and an upper anchor of *very much pain*.

#### 2.7.2.2 Child self-report (ages 8+)

For patients over the age of eight, self-report pain was assessed using the Visual Analogue Scale for Pain (VAS). The VAS has been described in the literature as a reliable and well-validated pain assessment tool for use in older children [26, 27].

### 2.7.2.3 Parent (observational) report

Parent/caregiver observational pain scores were assessed using the Observer Visual Analogue Scale for Pain (VAS Observer) for pre-verbal paediatric patients and those under the age of four. The VAS Observer has been shown to be a reliable and valid observational pain scale for use in a non-verbal paediatric population, and for children who are unable to self-report their pain [28].

### 2.7.3 Secondary outcome measures

#### 2.7.3.1 Re-epithelialisation

Burns were considered re-epithelialised if  $\geq 95\%$  of the original wound area had re-epithelialised, and the patient no longer required definitive dressings. Wound re-epithelialisation was assessed using two methods. First, clinical judgement from the treating surgical consultant was determined at each dressing change. Second, a panel of paediatric burn specialists performed a blinded review of 3D images (3D LifeViz™ System; QuantifiCare, Valbonne, France) of patient's burn wounds taken at each dressing change.

#### 2.7.3.2 Stress

Stress was assessed in this trial using  $\alpha$ -amylase – a biochemical stress marker produced locally within salivary glands. Patients placed a SalivaBio Oral Swab™ (Salimetrics Europe Ltd., Newmarket, UK) under their tongue for 2 minutes for saliva collection. Salivary Alpha-Amylase Kinetic Enzyme Assay Kits (Item No. 1-1902, Salimetrics Inc) were used to quantify  $\alpha$ -amylase, as per the manufacturer's instructions. The trial protocol included assessments of levels of  $\alpha$ -amylase and cortisol as indicators of stress during burn wound treatment in the ED and subsequent dressing changes. Salivary  $\alpha$ -amylase (sAA) was selected over cortisol based on previous research conducted at the Pegg Leditschke Paediatric Burns OPD [29]. This research found sAA to be responsive to stress during wound care procedures, and also found an association between sAA and pain in children with thermal burns during dressing changes. Moreover, follow up appointments occur during a morning clinic which runs from 7.30am – 10am. Cortisol levels are known to peak within 30 – 45 minutes of waking up and then decrease due to diurnal variation. Due to the timing of sample collection, sAA was deemed to be a more appropriate measure of stress in this trial. Saliva samples were analysed from the following timepoints:

1. Pre- and post-application of the randomised dressing (i.e. Burnaid® or PVC film)

2. Following patient arrival in the Burns OPD for their first dressing change – prior to premedication and definitive dressing removal
3. Following patient arrival in the Burns OPD for their second dressing change – prior to premedication and definitive dressing removal

### 2.7.3.3. *Staff and caregiver perspectives on dressings*

Dressing satisfaction from clinical staff regarding ease of randomised dressing application, ease of removal, flexibility, and conformity were rated using a self-report 0 – 10 Numeric Rating Scale (NRS) for both Burnaid® dressings and PVC film from ED nursing staff. Parent/caregiver ratings on ease of dressing application, removal, comfort, and ease of movement were also assessed using a 0 – 10 NRS. It is acknowledged that ease of dressing measurements within the ED were confounded due to lack of blinding, and as a result of the variable nature, size, and anatomical location of the areas to be dressed.

### 2.7.3.4 *Demographic and clinical information*

Demographic and clinical details were obtained from parents/caregivers and medical records including age, sex, burn mechanism, area affected, estimated burn TBSA, and prehospital care (such as first aid and pharmacological interventions). Treating surgical staff first assessed burn TBSA in the ED following wound debridement using a modified version of the Lund and Browder chart [30]. Burn TBSA was also assessed at each change of dressing from the child's treating consultant until the burns were considered to be 95% re-epithelialised. Burn depth was assessed using two methods in the trial. First, clinical judgment from the treating surgical consultant was reported following initial patient presentation to the hospital, and at each follow up appointment in the Burns OPD for dressing changes. Second, burn depth was assessed using rapid imaging with Moor LDLS-BI™ Laser Doppler Imager (Moor Instruments Limited, Devon, United Kingdom). Laser Doppler Imaging (LDI) is a non-contact technique used in the assessment of burn injuries to measure skin blood perfusion at the surface of the burn wound [31]. LDI measures the extent of micro-vessel blood flow within the whole burn area, providing information on burn depth via microcirculation expressed as “perfusion units” (PU) [32, 33]. Participants had their burn wounds scanned using LDI on their first change of dressing (72 – 120 hours post-burn) in the Burns Outpatient Department to obtain mean and minimum PU. This time period for LDI is in accordance with the manufactures instructions, and has been established as acceptable time frame in recent studies [34, 35].

## 2.8 Statistical Analysis

In accordance with previous studies aiming to reduce pain in paediatric burn patients, we expected pain scores within each treatment group to have a normal distribution and a standard deviation (SD) of 2.4 [36]. Data were analysed on an intent-to-treat basis. Sample size was estimated at 29 experimental (intervention) participants and 29 control participants to detect a significant between-group difference of 1.8 in pain scores post-dressing application. With power equal to 0.8,  $\alpha$  set at 0.05, and up to a potential 20% loss to follow-up, the calculated target sample size was 72 participants. Between-group differences in primary and secondary outcomes were estimated using mixed models in Stata version 16 [37]. Random effects for patients accounted for the repeated measures, and restricted maximum likelihood method with Kenward-Rogers degrees of freedom was used. Each model included data at baseline (i.e. pre-dressing) and at one follow-up time, and assumed no population differences at baseline, a change from baseline in the control group and a different change from baseline in the intervention group. Adjusted mean differences (Intervention - Control) and 95% confidence intervals (CIs) are reported. The sAA data was log-transformed, and the adjusted ratio of geometric means (Intervention  $\div$  Control) are reported [38].

## 3. Results

### 3.1 Sample and demographic characteristics

Seventy-two paediatric burn patients were randomised and recruited into the trial. Four participants were lost to follow up and had no additional data collected past the initial point of treatment in the ED. Patient demographic details and baseline characteristics are presented in *Table 1*.

**Table 1.** Participant demographic and clinical variables

| Variable                       | Intervention<br>N = 37 | Control<br>N = 35 |
|--------------------------------|------------------------|-------------------|
| Patient age (years)            |                        |                   |
| 0 – 3                          | 20 (54%)               | 27 (77%)          |
| 4 – 7                          | 9 (24%)                | 5 (14%)           |
| 8 – 16                         | 8 (22%)                | 3 (9%)            |
| Indigenous status              |                        |                   |
| Not indigenous                 | 34 (92%)               | 33 (94%)          |
| Aboriginal                     | 2 (5%)                 | 2 (6%)            |
| Torres Strait Islander         | 1 (3%)                 | 0 (0%)            |
| Gender                         |                        |                   |
| Male                           | 22 (59%)               | 19 (54%)          |
| Mechanism of injury            |                        |                   |
| Scald                          | 26 (70%)               | 28 (80%)          |
| Contact                        | 8 (22%)                | 7 (20%)           |
| Flame                          | 2 (5%)                 | 0 (0%)            |
| Flash                          | 1 (3%)                 | 0 (0%)            |
| Burn source                    |                        |                   |
| Hot beverage                   | 10 (27%)               | 14 (40%)          |
| Water from kettle/saucepan/tap | 7 (19%)                | 10 (29%)          |
| Noodles                        | 7 (19%)                | 3 (9%)            |
| Food (other)                   | 1 (3%)                 | 1 (3%)            |
| Stove/oven/barbeque            | 4 (11%)                | 3 (9%)            |
| Lighter                        | 2 (5%)                 | 0 (0%)            |
| Hair straightener/curling iron | 1 (3%)                 | 2 (6%)            |
| Fireplace/sun heated metal     | 2 (5%)                 | 2 (6%)            |
| Hot oil/wax                    | 2 (5%)                 | 0 (0%)            |
| Aerosol can explosion          | 1 (3%)                 | 0 (0%)            |
| Burn TBSA percentage           | 2 (1 - 4)              | 2 (1 - 4)         |
| Burn depth                     |                        |                   |
| Superficial partial thickness  | 30 (81%)               | 24 (69%)          |
| Deep dermal partial thickness  | 7 (19%)                | 11 (31%)          |
| Burn wound perfusion           |                        |                   |
|                                | † N = 48               | † N = 43          |
| LDI Mean PU                    | 696 (293)              | 679 (276)         |
| LDI Minimum PU                 | 144 (143)              | 110 (104)         |

|    |                                       |          |          |
|----|---------------------------------------|----------|----------|
| 1  |                                       |          |          |
| 2  | Anatomical region affected            |          |          |
| 3  |                                       |          |          |
| 4  | Upper limb and/or hand                | 19 (51%) | 20 (57%) |
| 5  | Lower limb and/or foot                | 11 (30%) | 10 (29%) |
| 6  |                                       |          |          |
| 7  | Chest, abdomen, and/or back           | 12 (32%) | 13 (37%) |
| 8  | Head, face, and/or neck               | 8 (22%)  | 10 (29%) |
| 9  |                                       |          |          |
| 10 | Buttocks, perineum, and/or genitals   | 5 (14%)  | 2 (6%)   |
| 11 |                                       |          |          |
| 12 | Number of anatomical regions affected |          |          |
| 13 | 1                                     | 24 (65%) | 21 (60%) |
| 14 |                                       |          |          |
| 15 | 2                                     | 8 (22%)  | 9 (26%)  |
| 16 |                                       |          |          |
| 17 | 3                                     | 5 (14%)  | 4 (11%)  |
| 18 |                                       |          |          |
| 19 | 4                                     | 0 (0%)   | 1 (3%)   |
| 20 | Required medication in the ED         |          |          |
| 21 | Paracetamol                           | 32 (86%) | 33 (94%) |
| 22 |                                       |          |          |
| 23 | Ibuprofen                             | 26 (70%) | 28 (80%) |
| 24 |                                       |          |          |
| 25 | Oxycodone                             | 21 (57%) | 21 (60%) |
| 26 |                                       |          |          |
| 27 | Fentanyl                              | 28 (76%) | 27 (77%) |
| 28 |                                       |          |          |
| 29 | Nitrous                               | 4 (11%)  | 4 (11%)  |
| 30 |                                       |          |          |
| 31 | Ketamine                              | 1 (3%)   | 1 (3%)   |
| 32 |                                       |          |          |
| 33 | Methoxyflurane                        | 2 (5%)   | 1 (3%)   |
| 34 |                                       |          |          |
| 35 | Morphine                              | 1 (3%)   | 0 (0%)   |
| 36 |                                       |          |          |
| 37 | Midazolam                             | 1 (3%)   | 0 (0%)   |
| 38 |                                       |          |          |
| 39 | Polypharmacy                          |          |          |
| 40 |                                       |          |          |
| 41 | 0                                     | 1 (3%)   | 0 (0%)   |
| 42 |                                       |          |          |
| 43 | 1                                     | 4 (11%)  | 3 (9%)   |
| 44 |                                       |          |          |
| 45 | 2                                     | 4 (11%)  | 4 (11%)  |
| 46 |                                       |          |          |
| 47 | 3                                     | 14 (38%) | 12 (34%) |
| 48 |                                       |          |          |
| 49 | 4                                     | 10 (27%) | 12 (34%) |
| 50 |                                       |          |          |
| 51 | 5                                     | 2 (5%)   | 4 (11%)  |
| 52 |                                       |          |          |
| 53 | 6                                     | 2 (5%)   | 0 (0%)   |
| 54 |                                       |          |          |
| 55 | Distraction Techniques                |          |          |
| 56 |                                       |          |          |
| 57 | Nil                                   | 13 (35%) | 9 (26%)  |
| 58 |                                       |          |          |
| 59 | Lollies/food                          | 1 (3%)   | 4 (11%)  |
| 60 |                                       |          |          |
|    | Sleeping                              | 2 (5%)   | 1 (3%)   |
|    |                                       |          |          |
|    | Television/phone distraction          | 15 (41%) | 11 (31%) |
|    |                                       |          |          |
|    | Bubbles/toys                          | 5 (14%)  | 7 (20%)  |
|    |                                       |          |          |
|    | Music therapy/clown doctors           | 1 (3%)   | 2 (6%)   |
|    |                                       |          |          |
|    | Ditto™ distraction device             | 0 (0%)   | 1 (3%)   |



| Definitive dressings applied in ED          |                  |                |
|---------------------------------------------|------------------|----------------|
| Acticoat™ 3 + Mepitel™ + Hypafix®           | 13 (35%)         | 10 (29%)       |
| Acticoat™ 7 + Mepitel™ + Hypafix®           | 7 (19%)          | 8 (23%)        |
| Mepilex Ag™ + Hypafix®                      | 16 (43%)         | 16 (46%)       |
| Paraffin wax                                | 1 (3%)           | 1 (3%)         |
| Time (minutes) to ED presentation           | N = 36           | N = 34         |
|                                             | 90 (66 – 137)    | 79 (60 – 119)  |
| Time (minutes) spent in ED                  | 106.5 (66 – 151) | 113 (76 – 180) |
| Time (minutes) dressing was applied to burn | 34 (22-61)       | 35 (5-150)     |
| Documented first aid (20 minutes CRW)       | 36 (97%)         | 34 (97%)       |
| QAS applied Burnaid®                        | 11 (30%)         | 7 (20%)        |
| QAS applied PVC film                        | 8 (22%)          | 11 (31%)       |
| High pain risk stratum                      | 8 (22%)          | 9 (26%)        |

Data are presented as median (IQR) for continuous measures, and N (%) for categorical measures unless stated otherwise. † As a result of patients having multiple burns to different anatomical regions, LDI scans were taken of 91 burn wounds from 58 patients:  $n = 48$  burns for the intervention group and  $n = 43$  wounds for the control. N = number of participants; ED = emergency department; CRW = cold running water; QAS = Queensland ambulance service, TBSA = total body surface area; LDI = laser Doppler imaging; PU = perfusion units; PVC = plasticized polyvinylchloride.

No adverse events occurred in the intervention or control group, and no baseline population differences were identified. Sixteen participants ( $n = 4$  intervention and  $n = 12$  control) did not keep their randomised dressings on for the required 20-minute duration. Two main factors challenged dressing adherence during acute data collection in the ED. First, excessive wound exudate beneath the PVC film caused the dressings to slip off participant's burns. Second, a number of paediatric patients pulled at and removed their own dressings. Fidelity in these instances was compromised. Throughout data collection, no children in the 4 – 8 age group reported having trouble self-reporting their pain to the investigator using the FPS – R. Data were collected for dressing changes four ( $n = 8$ ), five ( $n = 4$ ), six ( $n = 1$ ), seven ( $n = 1$ ), eight ( $n = 1$ ), nine ( $n = 1$ ) and ten ( $n = 1$ ) for patients requiring multiple dressing changes, but were not included in the analysis due to low numbers of participants in the trial requiring more than four dressings.

Successful LDI scans were completed for 58 out of the 72 participants during their first burn dressing change. The revised standard scale of 0 – 1000 PU was used to measure burn depth from LDI scans. In accordance with previous studies, 0 – 250 PU indicated full thickness injuries, 250 – 625 PU represented deep dermal

1 partial thickness burns, and >625 PU corresponded to superficial partial thickness burns [39]. T-tests  
2 revealed no significant difference in LDI scores between the intervention or control group for mean  
3  
4 perfusion,  $p = 0.79$ . In addition, no difference in minimum LDI scores were found between the intervention  
5  
6 or control group,  $p = 0.20$ . Mean PUs for both groups were greater than or equal to 625 PU indicating  
7  
8 superficial partial thickness burn injuries. These values support clinical judgement from the treating surgical  
9  
10 consultants for burn depth assessment (see *Table 1*.)  
11  
12  
13  
14

### 15 3.2 Primary outcome

16 Acute pain scores collected in the ED before and after the application of the randomised dressing (T1 and  
17  
18 T2), and before and after definitive dressing application (T3 and T4), are reported in *Table 2* for the two  
19  
20 groups. No significant between-group differences in pain scores (assessed using the FLACC scale from  
21  
22 nursing staff) were found between paediatric patients who received Burnaid® dressings and those who  
23  
24 received PVC film as an acute burn dressing in the ED following initial presentation to the QCH and CRW  
25  
26 first aid. No significant group differences in FLACC scores were found post-randomised dressing application  
27  
28 (Mean Difference: -0.1, 95% CI: -0.7 to 0.5,  $p = 0.72$ ), pre-definitive dressing application (Mean Difference:  
29  
30 -0.3, 95% CI: -1 to 0.5,  $p = 0.51$ ), or post-definitive dressing application (Mean Difference: 0, 95% CI: -0.8  
31  
32 to 0.9,  $p = 0.92$ ).  
33  
34  
35  
36  
37  
38  
39  
40  
41  
42  
43  
44  
45  
46  
47  
48  
49  
50  
51  
52  
53  
54  
55  
56  
57  
58  
59  
60

**Table 2.** Acute pain scores in the ED

| Pain scale                   | Time point | N  | Intervention<br>Mean (SD) | N  | Control<br>Mean (SD) | Adjusted<br>Mean<br>Difference | 95% CI      | <i>p</i> value |
|------------------------------|------------|----|---------------------------|----|----------------------|--------------------------------|-------------|----------------|
| FLACC<br>(0 – 10 scale)      | T1         | 35 | 1.2 (2.1)                 | 23 | 0.7 (1.4)            | -                              | -           | -              |
|                              | T2         | 36 | 0.4 (1.0)                 | 35 | 0.4 (0.7)            | -0.1                           | -0.7 to 0.5 | 0.72           |
|                              | T3         | 36 | 0.4 (1.2)                 | 34 | 0.6 (1.6)            | -0.3                           | -1 to 0.5   | 0.51           |
|                              | T4         | 35 | 0.8 (1.7)                 | 33 | 0.7 (1.5)            | 0                              | -0.8 to 0.9 | 0.92           |
|                              | Peak Pain  | 36 | 3.4 (2.4)                 | 34 | 3.9 (2.8)            | 0.6                            | 1.7 to 0.5  | 0.29           |
| VAS<br>(0 – 100)             | T1         | 9  | 38 (29)                   | 2  | 20 (14)              | -                              | -           | -              |
|                              | T2         | 10 | 20 (22)                   | 4  | 28 (36)              | -14                            | -37 to 9    | 0.22           |
|                              | T3         | 11 | 16 (21)                   | 5  | 8 (18)               | 4                              | -18 to 26   | 0.74           |
|                              | T4         | 7  | 31 (25)                   | 4  | 25 (44)              | -1                             | -31 to 29   | 0.96           |
| FPS – R<br>(0 – 10)          | T1         | 9  | 3.3 (3.7)                 | 7  | 3.6 (2.6)            | -                              | -           | -              |
|                              | T2         | 10 | 2.8 (4.2)                 | 8  | 2.4 (3.0)            | 0.3                            | -1.7 to 2.2 | 0.78           |
|                              | T3         | 11 | 1.5 (3.3)                 | 11 | 1.3 (3.1)            | 0.6                            | -1.8 to 2.9 | 0.64           |
|                              | T4         | 10 | 2.9 (3.5)                 | 10 | 3.0 (4.1)            | 0.1                            | -3.1 to 3.3 | 0.96           |
| VAS<br>Observer<br>(0 – 100) | T1         | 34 | 32 (28)                   | 22 | 30 (21)              | -                              | -           | -              |
|                              | T2         | 34 | 22 (24)                   | 31 | 21 (19)              | 1                              | -8 to 11    | 0.78           |
|                              | T3         | 35 | 18 (20)                   | 34 | 18 (25)              | 0                              | -11 to 11   | 0.96           |
|                              | T4         | 33 | 24 (25)                   | 32 | 18 (26)              | 6                              | -7 to 18    | 0.36           |

\* Adjusted Mean Difference = Intervention Group – Control Group. FLACC = face, legs, activity, cry, consolability; VAS = visual analogue scale; FPS-R = faces pain scale revised; SD = standard deviation; CI = confidence interval; T1 = pre-randomised dressing application; T2 = post-randomised dressing application; T3 = pre-definitive dressing application; T4 = post-definitive dressing application.

### 3.2.1 Ancillary Pain Measures

#### 3.2.1.1. Parent and Caregiver Pain Scores (Observer VAS)

There were no significant differences in pain scores between the control and intervention group for observational pain ratings from parents and caregivers assessed using the VAS Observer in the ED. No significant between-group differences in VAS Observer pain scores were found between the intervention and control groups for post-randomised dressing application (Mean Difference: 1, 95% CI: -8 to 11,  $p = 0.78$ ), pre-definitive dressing application (Mean Difference: 0, 95% CI: -11 to 11,  $p = 0.96$ ), or post-definitive dressing application (Mean Difference: 6, 95% CI: -7 to 18,  $p = 0.36$ ) time points.

### 3.2.1.2 Child reported pain (FPS-R and VAS)

Child self-report pain scores measured using the FPS-R and VAS showed no significant between-group differences. Self-report FPS-R scores assessed post-dressing application (Mean Difference: 0.3, 95% CI: -1.7 to 2.2,  $p = 0.78$ ), pre-definitive application (Mean Difference: 0.6, 95% CI: -1.8 to 2.9,  $p = 0.64$ ), and post-definitive dressing application (Mean Difference: 0.1, 95% CI: -3.1 to 3.3,  $p = 0.96$ ) showed no significant group differences. As burn injuries often affect infants and children under the age of five, a small number of children recruited into the trial were aged over eight. The VAS for Pain is designed for children aged eight years and older. As a consequence of the median patient age, low numbers of participants were able to use this self-report pain scale and therefore limited statistical tests that could be performed. Median self-report VAS scores are presented in *Table 2* but should be interpreted with consideration of this sample size limitation.

## 3.3 Secondary outcomes

### 3.3.1 Physiological measures

No significant difference in mean pulse rate (Mean Difference: -3, 95% CI: -11 to 5,  $p = 0.41$ ) or temperature (Mean Difference: 0.6, 95% CI: -0.13 to 0.24,  $p = 0.53$ ) was detected between intervention and control groups following the application of the randomised dressings in the ED (see *Table 3*).

**Table 3.** Physiological measures in the ED

| Measure                     | Time point | N  | Intervention<br>Mean (SD) | N  | Control<br>Mean (SD) | Adjusted Mean<br>Difference | 95% CI        | p value |
|-----------------------------|------------|----|---------------------------|----|----------------------|-----------------------------|---------------|---------|
| Pulse<br>(Beats/minute)     | T1         | 34 | 111 (27)                  | 24 | 112 (20)             | -                           | -             | -       |
|                             | T2         | 34 | 104 (26)                  | 32 | 109 (21)             | -3                          | -11 to 5      | 0.41    |
|                             | T3         | 33 | 105 (26)                  | 32 | 113 (21)             | -8                          | -16 to 1      | 0.07    |
|                             | T4         | 29 | 109 (25)                  | 31 | 113 (24)             | -3                          | -12 to 6      | 0.52    |
| Temperature<br>(° Celsius)  | T1         | 35 | 36.34                     | 25 | 36.42                | -                           | -             | -       |
|                             | T2         | 36 | 36.42                     | 33 | 36.36                | 0.6                         | -0.13 to 0.24 | 0.53    |
|                             | T3         | 36 | 36.43                     | 33 | 36.33                | 0.12                        | -0.12 to 0.37 | 0.33    |
|                             | T4         | 34 | 36.44                     | 33 | 36.32                | 0.14                        | -0.14 to 0.40 | 0.29    |
| Alpha-amylase<br>(units/mL) |            |    | † Mean (×/SD)             |    | † Mean (×/SD)        | † Ratio of Means            | 95% CI        |         |
|                             | T1         | 19 | 48 (×/2)                  | 8  | 46 (×/3)             | -                           | -             | -       |
|                             | T2         | 26 | 54 (×/3)                  | 20 | 37 (×/2)             | 1.53                        | 0.93 to 2.53  | 0.10    |

SD = standard deviation; CI = confidence interval; mL = millilitre; T1 = pre-randomised dressing application; T2 = post-randomised dressing application; T3 = pre-definitive dressing application; T4 = post-definitive dressing application. \* Adjusted Mean Difference = Intervention Group – Control Group. † Alpha-amylase data reported as geometric mean, geometric standard deviation, and ratio of geometric means.

### 3.3.2 Re-epithelialisation

Median (IQR) time to re-epithelialisation for the intervention group was 9 days (6.25 – 10.75) and 9 days (7.5 – 14) for the control group. Clinical assessment from treating surgeons showed no significant between-group differences in time to 95% re-epithelialisation, with a median difference (95% CI) equal to -1 (-3 to 1),  $p = 0.26$ . With regards to the blinded assessment of burn wound images, exact agreement between the treating surgical consultants and blinded review panel was used to examine agreement between health professionals measuring time to re-epithelialisation [40]. Agreement on evaluation of re-epithelialisation was found to be good (69% agreement) between the three expert reviewers and the treating surgeons (see *Appendix A* for additional agreement data).

### 3.3.3 Biochemical stress markers

No significant difference in sAA was found between the intervention and control group following the application of the randomised dressing during acute care in the ED (see *Table 3*). Children who received

1  
2 Burnaid® dressings did not show a reduction in the biochemical stress marker in comparison to paediatric  
3 patients who received PVC film (Geometric Mean Ratio: 1.53, 95% CI = 0.93 to 2.53,  $p = 0.10$ ). Levels of  
4 sAA collected in the waiting room during dressing changes one (Geometric Mean Ratio: 1, 95% CI = 0.65 –  
5 1.56,  $p = 0.97$ ) and two (Geometric Mean Ratio: 1.14, 95% CI = 0.48 – 2.71,  $p = 0.75$ ) showed no significant  
6 differences between children who received Burnaid® dressings in the ED and those who received PVC film  
7 (see *Appendix B*).  
8  
9  
10  
11  
12  
13  
14

### 15 3.3.4 Pain at first, second, and third dressing changes

16 Pain scores assessed in the Burns Outpatient Department during follow up dressing changes one to three are  
17 reported in *Appendix C* for the two treatment groups. No statistical differences in observational or child self-  
18 report follow up pain scores were found between children who received Burnaid® dressings and those who  
19 received PVC film during acute care. Temperature and pulse rate assessed during follow up dressing changes  
20 (as physiological indicators of pain) also showed no significant group differences over dressing changes one  
21 to three (see *Appendix B* for physiological data).  
22  
23  
24  
25  
26  
27  
28  
29

### 30 3.3.5 Staff and caregiver perspectives on dressings

31 Dressing satisfaction from clinical staff, in addition to parents and caregivers, assessed in the ED during  
32 acute care is presented in *Appendix D*. No significant differences in ease of dressing application, removal,  
33 flexibility, or conformity were identified between the two groups from ED nursing staff. Parents are  
34 caregivers reported higher satisfaction scores for ease of dressing application for children who received  
35 Burnaid dressings, in comparison to those who received PVC film ( $p = 0.013$ ). Parent/caregiver satisfaction  
36 scores were also higher for ease of dressing removal within the Burnaid arm, in comparison to the control  
37 arm ( $p = 0.045$ ). Furthermore, parents and caregivers reported higher satisfaction scores for ease of  
38 movement for children who received Burnaid, in comparison to paediatric patients who received PVC film in  
39 the ED ( $p = 0.047$ ). Last, no significant differences in perceived patient comfort were identified between the  
40 two groups from parents and caregivers using the 0 – 10 NRS.  
41  
42  
43  
44  
45  
46  
47  
48  
49  
50  
51  
52  
53  
54

## 55 4. Discussion

56  
57  
58 There has been an emergence of research demonstrating the importance of acute pain control in traumatic  
59 injuries, emphasising the association between untreated pain and maladaptive outcomes such as: prolonged  
60

1  
2 wound healing [4, 5], long-term emotional disorders [6, 7], and chronic pain conditions [8, 9]. Pain is a chief  
3  
4 complaint for patients with burn injuries in the acute setting [41, 42]. Therefore, prehospital and acute care  
5  
6 providers have a crucial role in recognising and reducing the burden of pain for these patients. Reducing  
7  
8 acute pain is of particular importance for paediatric burn patients who often have to undergo numerous  
9  
10 painful and distressing medical procedures during their care. The better pain and distress are managed during  
11  
12 a child's first visit to the ED for burn wound treatment– the lower the child's chances are of developing  
13  
14 anticipatory anxiety and avoidance behaviours for future medical procedures [43]. Effective non-  
15  
16 pharmacological interventions for the management of acute burn pain are needed to supplement  
17  
18 pharmacological methods of pain reduction in paediatric patients [36, 44]. We were pleasantly reassured to  
19  
20 find most burn patients presenting to our ED had mild to no pain. Because of this, examining the  
21  
22 effectiveness of acute burn dressings on reducing acute pain score was restricted – and results from this  
23  
24 prospective RCT should be interpreted with the acknowledgement of this limitation. At present, there are no  
25  
26 high level trials supporting the use of Burnaid® hydrogel dressings for acute burn management. The aim of  
27  
28 this trial was to fill this gap in the literature, and examine the effectiveness of Burnaid® dressings on  
29  
30 reducing acute pain scores in children with thermal burns. To the best of our knowledge, this is the first  
31  
32 prospective RCT conducted in a paediatric burn population examining the analgesic properties of a hydrogel  
33  
34 burn dressing in an ED setting.  
35  
36

37  
38 Results from this prospective RCT should be interpreted with consideration of several limitations. First, very  
39  
40 few participants had moderate to severe pain scores following their initial presentation to the QCH prior to  
41  
42 recruitment into the trial - see *Appendix E* for complete pain score frequencies. More than 60% of paediatric  
43  
44 burn patients received observational pain scores of zero (out of ten using the FLACC pain scale) from ED  
45  
46 nursing staff. Moreover, an additional 19% of children received pain ratings equal to one (using the ten-point  
47  
48 scale) following initial presentation to the ED. A significant effect of the intervention on reducing acute burn  
49  
50 pain might not have been identified in this trial because pain scores were so low following patient's first  
51  
52 presentation to hospital for their burn. Second, prehospital and referral services in Queensland acted to  
53  
54 provide comprehensive pharmacotherapies for pain management to paediatric patients with thermal burns  
55  
56 during transportation to the QCH. So much so that pain scores might have been too low to observe a  
57  
58 significant reduction following application of the intervention or control. A large proportion (78%) of patients  
59  
60

1  
2 enrolled in the trial received three or more medication classes during their acute burn care – the most common  
3  
4 combination being paracetamol, ibuprofen, fentanyl for both groups (see *Table 1*).

5  
6 The third limitation also relates to prehospital care, and includes the use of different acute burn dressings  
7  
8 during patient transport to hospital, prior to randomisation and enrolment in the trial. As this was a pragmatic  
9  
10 trial aiming to simulate real-world clinical scenarios within the ED, the application of prehospital acute burn  
11  
12 dressings was not an exclusion criterion for participation. However, this meant that some participants  
13  
14 received PVC film or Burnaid prior to presenting to the QCH, which may have had confounding effects.

15  
16 Fourth, where a patient enrolled in the trial received their first aid cooling was not delineated in the dataset  
17  
18 and this is considered to be a limitation of the trial. In addition, whilst all administered analgesia from the  
19  
20 time the burn was sustained to initial presentation to the ED and wound debridement was recorded for all  
21  
22 patients, where this analgesia was administered was also not delineated in the dataset and is also viewed as a  
23  
24 significant research limitation.  
25  
26

27  
28 The last limitation relates to potential moderating effects. Non-pharmacological interventions such as  
29  
30 distraction are commonplace during paediatric medical procedures. Almost 70% of all participants received  
31  
32 additional distraction techniques during their acute burn treatment in the ED such as video distraction using  
33  
34 mobile phones and television, clown doctors, music therapists, bubbles, toys, and lollies (see *Table 1*). These  
35  
36 non-pharmacological interventions were also left in place to simulate a real-world pragmatic trial, however  
37  
38 could have moderated the effect of the intervention. An effect of the intervention on reducing acute pain  
39  
40 scores might not have been detected due to the low pain scored at initial presentation, analgesia on-board at  
41  
42 the time of recruitment, or other confounding factors such as the application of prehospital burn dressings  
43  
44 prior to enrolment in the trial. It is therefore recommended that this research be replicated in the prehospital  
45  
46 setting – where acute pain scores are anticipated to be higher and the application of prehospital burn dressings  
47  
48 and analgesia can be better controlled.  
49  
50  
51

## 52 53 **5. Conclusion**

54  
55 It was predicted that Burnaid® dressings would provide superior analgesia for paediatric burn patients when  
56  
57 applied as an adjunct to CRW first aid, in comparison to PVC film (current standard practice). However, the  
58  
59 effect of the intervention on reducing acute pain scores was not supported in this investigation and we were  
60



1  
2 unable to show a clinically relevant treatment effect caused by the intervention – Burnaid® hydrogel  
3  
4 dressings. Results from this RCT found no significant between-group differences in observational pain  
5  
6 scores assessed using the FLACC pain scale from ED nursing staff – the primary outcome of the trial.  
7  
8 Moreover, no significant group-differences in parent/caregiver pain scores or child self-report pain scores  
9  
10 were identified during acute care in the ED or follow up wound care in the Burns OPD. The effect of the  
11  
12 intervention on additional outcomes including, time to re-epithelialisation, stress, temperature, heart rate, and  
13  
14 need for analgesic medication was also not supported. Ease of dressing application and removal, in addition  
15  
16 to ease of patient movement whilst dressings were applied, were higher for the Burnaid group in accordance  
17  
18 with parent and caregiver ratings. Dressing satisfaction measures from clinical staff within the ED found no  
19  
20 significant differences between patients who received Burnaid and those who received PVC film. Moreover,  
21  
22 no difference in perceived comfort ratings from parents and caregivers were identified between the two  
23  
24 groups. Research investigating adjunctive methods of pain control for children with burns holds great  
25  
26 translational value. It was predicted that an acute burn dressing with additional cooling and evaporative  
27  
28 properties would provide superior pain relief for children with thermal burns, in comparison to PVC film.  
29  
30 This was not supported, and Burnaid® dressings do not appear to provide superior pain relief in comparison  
31  
32 to PVC film when applied as an acute burn dressing following first aid and initial presentation to the ED.  
33  
34  
35  
36  
37  
38  
39  
40  
41  
42  
43  
44  
45  
46  
47  
48  
49  
50  
51  
52  
53  
54  
55  
56  
57  
58  
59  
60

1  
2  
3  
4  
5  
6  
7  
8  
9  
10  
11  
12  
13  
14  
15  
16  
17  
18  
19  
20  
21  
22  
23  
24  
25  
26  
27  
28  
29  
30  
31  
32  
33  
34  
35  
36  
37  
38  
39  
40  
41  
42  
43  
44  
45  
46  
47  
48  
49  
50  
51  
52  
53  
54  
55  
56  
57  
58  
59  
60

## **Declarations**

### *Funding*

This work was supported by a research grant given to The University of Queensland by Mundipharma (Grant Number: 364010399) and an Australian Government Research Training Scholarship awarded to the primary investigator. Mundipharma had no role in the development of the trial, data collection, data analysis, or interpretation of results.

### *Conflicts of Interests*

All authors who contributed to this original research manuscript declare no conflicts of interests. All authors declare no financial or other interests in the product (Burnaid®) or distributor of the product (Mundipharma).

All authors declare no past or existing relationships with the manufacturer or distributor of the product.

Moreover, all authors declare no additional associations with the product manufacturer or distributor including consultancies, stock ownership, or other equity interests or patent-licensing arrangements.

### *Author Statement*

RMK and BRG conceived the research, designed the trial, and obtained research funding. MDH undertook participant recruitment, acute and follow up data collection, data management, and interpretation of results.

MDC provided statistical support and conducted the formal analyses. MDH wrote the draft manuscript, and all authors provided critical review of the article and approved the final manuscript. MDH takes responsibility for the paper as a whole.

### *Acknowledgments*

We want to thank all the children and families for their time and participation in our research. We also wish to acknowledge and give thanks to the Burns, Surgical, and ED staff at the Queensland Children's Hospital for their support in the development and implementation of this research.

### *Data Sharing*

Additional data available upon request.

### *Word Count*

5430

## References

1. Scott LE, Crilly J, Chaboyer W, et al. Paediatric pain assessment and management in the emergency setting: The impact of a paediatric pain bundle. *Int Emerg Nurs*. 2013;21(3):173-19.
2. Summer GJ, Puntillo KA, Miaskowski C, et al. Burn injury pain: The continuing challenge. *J Pain*. 2007;8(7):533-48.
3. Morgan M, Deuis JR, Frøsig-Jørgensen M, et al. Burn pain: A systematic and critical review of epidemiology, pathophysiology, and treatment. *Pain Med*. 2018;19(4):708-34.
4. Brown NJ, Kimble RM, Rodger S, et al. Play and heal: Randomised controlled trial of Ditto™ intervention efficacy on improving re-epithelialization in pediatric burns. *Burns*. 2013;40(2):204-13.
5. Brown NJ, Kimble RM, Gramotnev G, et al. Predictors of re-epithelialization in pediatric burn. *Burns*. 2013.
6. De Young AC, Kenardy JA, Cobham VE, et al. Prevalence, comorbidity and course of trauma reactions in young burn-injured children. *J Child Psychol Psychiatry*. 2012;53(1):56-63.
7. Norman SB, Stein MB, Dimsdale JE, et al. Pain in the aftermath of trauma is a risk factor for post-traumatic stress disorder. *Psychol Med*. 2008;38(4):533-42.
8. Dauber A, Osgood PF, Breslau AJ, et al. Chronic Persistent Pain After Severe Burns: A Survey of 358 Burn Survivors. *Pain Med*. 2002;3(1):6-17.
9. Wollgarten-Hadamek I, Hohmeister J, Zohsel K, et al. Do school-aged children with burn injuries during infancy show stress-induced activation of pain inhibitory mechanisms? *Eur J Pain*. 2011;15(4):423.e1-e10.
10. Cuttle L, Kempf M, Liu PY, et al. The optimal duration and delay of first aid treatment for deep partial thickness burn injuries. *Burns*. 2010;36(5):673-9.
11. Bartlett N, Yuan J, Holland AJ, et al. Optimal duration of cooling for an acute scald contact burn injury in a porcine model. *J Burn Care Res*. 2008;29(5):828-34.
12. The Australian and New Zealand Burn Association. Emergency management of severe burns. 13 ed: Australian and New Zealand Burn Association; 2009.
13. Cuttle L, Kempf M, Kravchuk O, et al. The optimal temperature of first aid treatment for partial thickness burn injuries. *Wound Repair Regen*. 2008;16(5):626-34.
14. Griffin BR, Frear CC, Babl F, et al. Cool Running Water First Aid Decreases Skin Grafting Requirements in Pediatric Burns: A Cohort Study of Two Thousand Four Hundred Ninety-five Children. *Ann Emerg Med*. 2019.
15. Allison K, Porter K. Consensus on the pre-hospital approach to burns patient management. *Injury*. 2004;35(8):734-8.
16. Fein M, Quinn J, Watt K, et al. Prehospital paediatric burn care: New priorities in paramedic reporting. *Emerg Med Australas*. 2014;26(6):609-15.
17. Cuttle L, Kempf M, Kravchuk O, et al. The efficacy of Aloe vera, tea tree oil and saliva as first aid treatment for partial thickness burn injuries. *Burns*. 2008;34(8):1176-82.

- 1  
2 18. Holbert MD, Griffin BR, McPhail SM, et al. Effectiveness of a hydrogel dressing as an analgesic  
3 adjunct to first aid for the treatment of acute paediatric thermal burn injuries: study protocol for a randomised  
4 controlled trial. *Trials*. 2019;20(1):13.
- 5  
6 19. Milner RH, Hudson SJ, Reid CA. Plasticized polyvinyl chloride film as a primary burns dressing: a  
7 microbiological study. *Burns*. 1988;14(1):62-5.
- 8  
9 20. Lendrum J, Bowen-Jones E. A new dressing for burns: Enclosure in a plasticized polyvinyl chloride  
10 sheet. *Burns*. 1976;2(2):86-9.
- 11  
12 21. Merkel S, Voepel-Lewis T, Malviya S. Pain assessment in infants and young children: The FLACC  
13 scale: A behavioral tool to measure pain in young children. *Am J Nurs*. 2002;102(10):55-58.
- 14  
15 22. Willis MHW. FLACC behavioural pain assessment scale: A comparison with the child's self-report.  
16 *Pediatr Nurs*. 2003;29(3):195-8.
- 17  
18 23. Gomez R, Barrowman N, Elia S, et al. Reliability of the flacc scale for evaluating pain in toddlers.  
19 *Irish J Med Sci*. 2012;181(11):456-456.
- 20  
21 24. von Baeyer CL. Children's self-report of pain intensity: what we know, where we are headed. Pain  
22 research & management. 2009;14(1):39-45.
- 23  
24 25. Hicks CL, von Baeyer CL, Spafford PA, et al. The Faces Pain Scale – Revised: Toward a common  
25 metric in pediatric pain measurement. *Pain*. 2001;93(2):173-83.
- 26  
27 26. Bailey B, Gravel J, Daoust R. Reliability of the visual analog scale in children with acute pain in the  
27 emergency department. *Pain*. 2012;153(4):839-42.
- 28  
29 27. Stinson NJ, Kavanagh NT, Yamada NJ, et al. Systematic review of the psychometric properties,  
30 interpretability and feasibility of self-report pain intensity measures for use in clinical trials in children and  
31 adolescents. *Pain*. 2006;125(12):143-57.
- 32  
33 28. Taddio A, O'brien L, Ipp M, et al. Reliability and validity of observer ratings of pain using the visual  
34 analog scale (VAS) in infants undergoing immunization injections. *Pain*. 2009;147(123):141-6.
- 35  
36 29. Brown NJ, Kimble RM, Rodger S, et al. Biological markers of stress in pediatric acute burn injury.  
37 *Burns*. 2014;40(5):887-95.
- 38  
39 30. Dibildox M, Jeschke MG, Herndon DN. Burn Injury, Rule of Nines. In: Vincent J-L, Hall JB,  
40 editors. *Encyclopedia of Intensive Care Medicine*. Berlin, Heidelberg: Springer Berlin Heidelberg; 2012.  
41 417-9.
- 42  
43 31. Wang X-Q, Mill J, Kravchuk O, et al. Ultrasound assessed thickness of burn scars in association  
44 with laser Doppler imaging determined depth of burns in paediatric patients. *Burns*. 2010;36(8):1254-62.
- 45  
46 32. Mill J, Cuttle L, Harkin DG, et al. Laser Doppler imaging in a paediatric burns population. *Burns*.  
47 2009;35(6):824-31.
- 48  
49 33. Gill P. The critical evaluation of laser Doppler imaging in determining burn depth. *Int J Burns*  
50 *Trauma*. 2013;3(2):72-7.
- 51  
52 34. Štětinský J, Klosová H, Kolářová H, et al. The time factor in the LDI (Laser Doppler Imaging)  
53 diagnosis of burns. *Lasers Surg Med*. 2015;47(2):196-202.
- 54  
55  
56  
57  
58  
59  
60

- 1  
2 35. Wearn C, Lee KC, Hardwicke J, et al. Prospective comparative evaluation study of Laser Doppler  
3 Imaging and thermal imaging in the assessment of burn depth. *Burns*. 2018;44(1):124-33.  
4  
5 36. Miller K, Rodger S, Kipping B, et al. A novel technology approach to pain management in children  
6 with burns: A prospective randomized controlled trial. *Burns*. 2011;37(3):395.  
7  
8 37. StataCorp. Stata Statistical Software: Release 16. College Station TSL.  
9  
10 38. Limpert E, Stahel WA. Problems with Using the Normal Distribution - and Ways to Improve Quality  
11 and Efficiency of Data Analysis. *PLoS One*. 2011.  
12  
13 39. Chester SJ, Tyack Z, De Young A, et al. Efficacy of hypnosis on pain, wound-healing, anxiety, and  
14 stress in children with acute burn injuries: A randomised controlled trial. *Pain*. 2018;159(9):1790.  
15  
16 40. de Vet HCW, Terwee CB, Knol DL, et al. When to use agreement versus reliability measures. *J Clin*  
17 *Epidemiol*. 2006;59(10):1033-9.  
18  
19 41. Yuxiang L, Lingjun Z, Lu T, et al. Burn patients' experience of pain management: A qualitative  
20 study. *Burns*. 2012;38(2):180-6.  
21  
22 42. Nedelec JB, Carrougher JG. Pain and Pruritus Postburn Injury. *J Burn Care Res*. 2017;38(3):142-5.  
23  
24 43. Michalska JK, Feldman SJ, Abend LR, et al. Anticipatory Effects on Perceived Pain: Associations  
25 With Development and Anxiety. *Psychosom Med*. 2018;80(9):853-60.  
26  
27 44. Miller K, Rodger S, Bucolo S, et al. Multi-modal distraction. Using technology to combat pain in  
28 young children with burn injuries. *Burns*. 2010;36(5):647-58.  
29  
30  
31  
32  
33  
34  
35  
36  
37  
38  
39  
40  
41  
42  
43  
44  
45  
46  
47  
48  
49  
50  
51  
52  
53  
54  
55  
56  
57  
58  
59  
60

1  
2 **Figure Legend**  
3

4 **Figure 1.** Consort flow diagram  
5  
6

7 **Figure 2.** Pain assessment timepoints during acute and follow up care  
8  
9  
10  
11  
12  
13  
14  
15  
16  
17  
18  
19  
20  
21  
22  
23  
24  
25  
26  
27  
28  
29  
30  
31  
32  
33  
34  
35  
36  
37  
38  
39  
40  
41  
42  
43  
44  
45  
46  
47  
48  
49  
50  
51  
52  
53  
54  
55  
56  
57  
58  
59  
60

For peer review only

**Figure 1. Consort Flow Diagram**

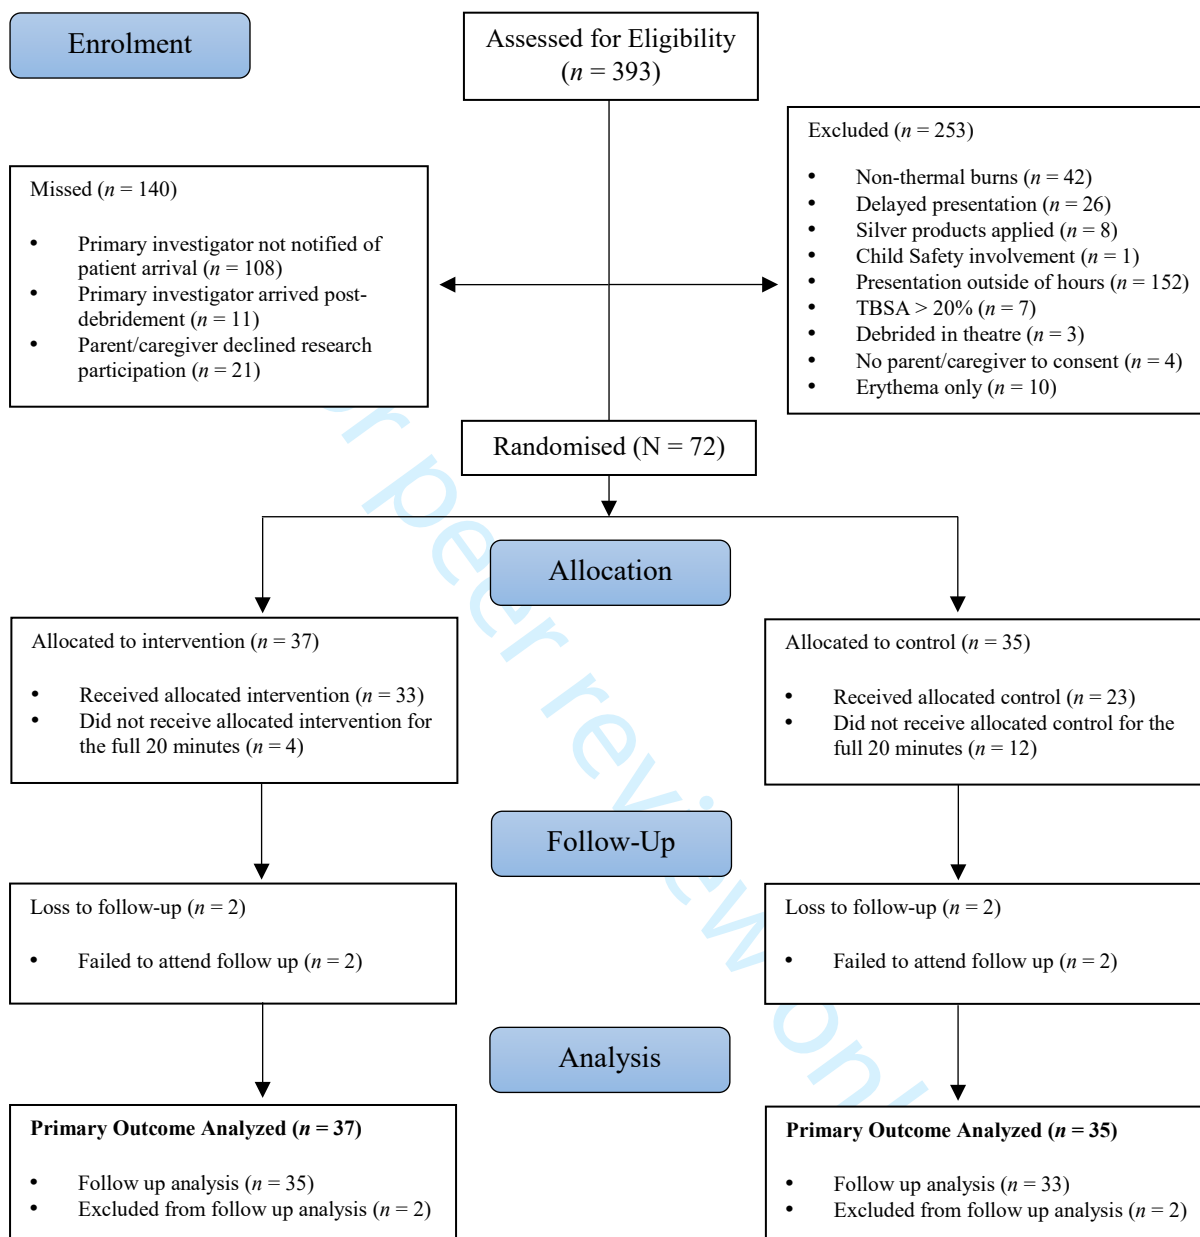

1 Figure 2A

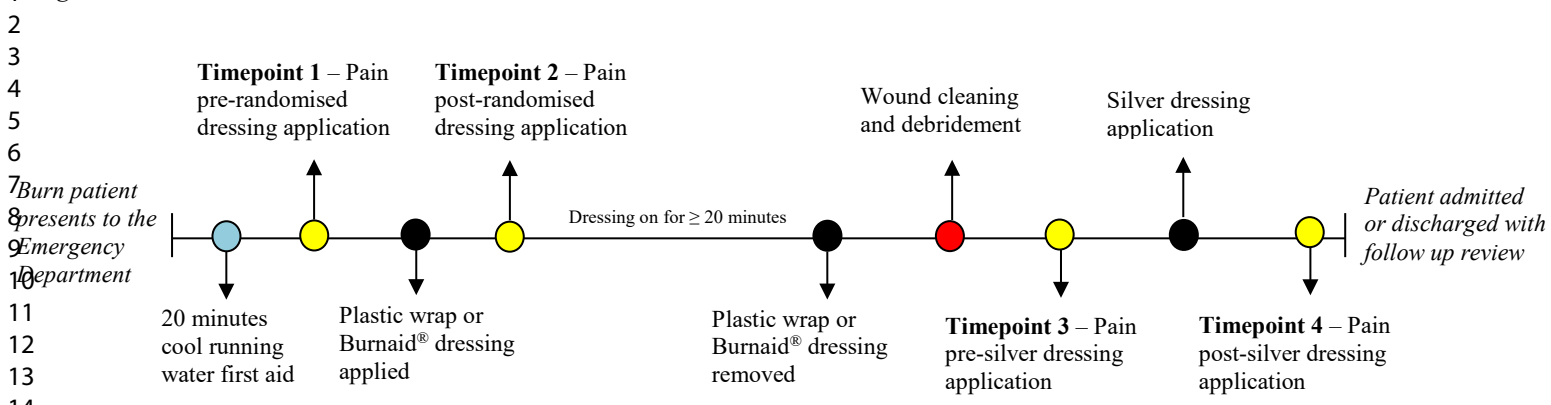

19 Figure 2B

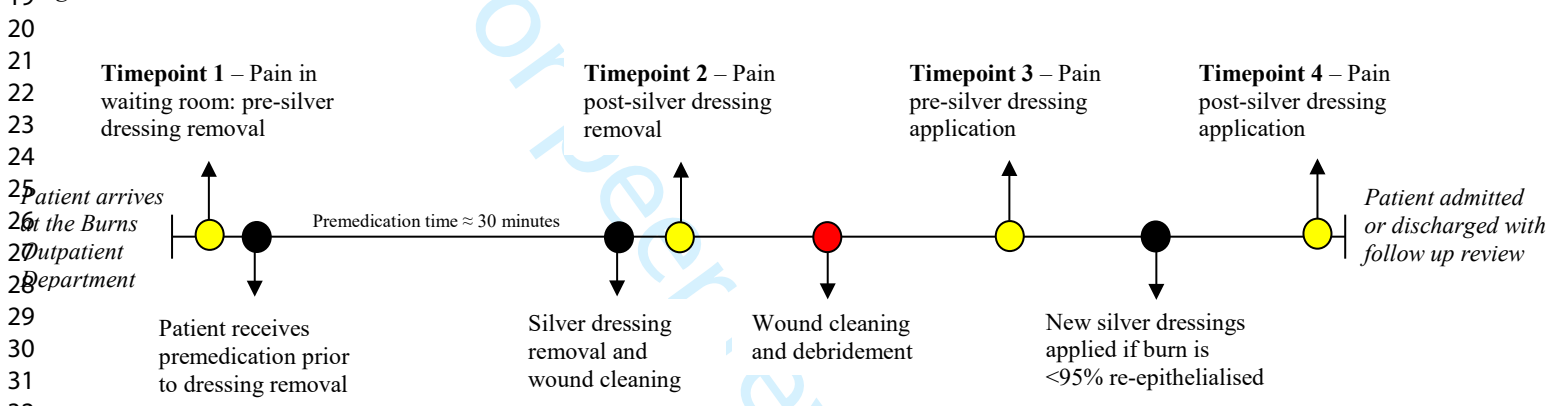



**Appendix A.** Exact agreement between clinicians assessing time to re-epithelialization: Treating surgical consultant versus blinded expert panel

| Clinicians                | Agreement between Clinicians |
|---------------------------|------------------------------|
| Consultant and Reviewer 1 | 64%                          |
| Consultant and Reviewer 2 | 64%                          |
| Consultant and Reviewer 3 | 69%                          |
| Reviewer 1 and Reviewer 2 | 71%                          |
| Reviewer 1 and Reviewer 3 | 71%                          |
| Reviewer 2 and Reviewer 3 | 75%                          |

## Appendix B. Physiological measures at follow up dressing changes

| Measure                              | Time point                      | Intervention<br>Mean (SD)       | Control<br>Mean (SD) | Adjusted Mean<br>Difference (95% CI) | <i>p</i> value         |
|--------------------------------------|---------------------------------|---------------------------------|----------------------|--------------------------------------|------------------------|
| Pulse rate<br>(beats/minute)         | 1 <sup>st</sup> Dressing Change |                                 |                      |                                      |                        |
|                                      | T1                              | 104.1 (21.7)                    | 109.9 (19.0)         | -6 (-17 to 5)                        | 0.29                   |
|                                      | T2                              | 100.4 (23.6)                    | 104.9 (17.4)         | -4 (-17 to 8)                        | 0.47                   |
|                                      | T3                              | 98.3 (25.8)                     | 104.9 (15.3)         | -7 (-20 to 7)                        | 0.33                   |
|                                      | T4                              | 99.3 (24.1)                     | 109.6 (19.68)        | -10 (-24 – 3)                        | 0.13                   |
|                                      | 2 <sup>nd</sup> Dressing Change |                                 |                      |                                      |                        |
|                                      | T1                              | 104.2 (21.4)                    | 119.1 (22.7)         | -15 (-30 to 0)                       | 0.05                   |
|                                      | T2                              | 100.9 (20.9)                    | 109.9 (23.0)         | -9 (-25 to 7)                        | 0.25                   |
|                                      | T3                              | 95.7 (20.5)                     | 104.0 (20.6)         | -8 (-29 to 12)                       | 0.41                   |
|                                      | T4                              | 95.7 (21.5)                     | 104.3 (19.9)         | -9 (-33 to 16)                       | 0.45                   |
|                                      | 3 <sup>rd</sup> Dressing Change |                                 |                      |                                      |                        |
|                                      | T1                              | 108 (12.2)                      | 111.3 (27.8)         | -3 (-33 to 16)                       | 0.81                   |
|                                      | T2                              | 98.4 (19.9)                     | 103.9 (18.8)         | -6 (-33 to 16)                       | 0.60                   |
|                                      | T3                              | 95.3 (24.2)                     | 94.8 (19.0)          | 1 (-33 to 16)                        | 0.97                   |
|                                      | T4                              | 96.3 (31.1)                     | 102.0 (28.3)         | -9 (-33 to 16)                       | 0.81                   |
|                                      | Temperature<br>(° Celsius)      | 1 <sup>st</sup> Dressing Change |                      |                                      |                        |
| T1                                   |                                 | 36.1 (0.4)                      | 36.0 (0.4)           | 0.05 (-0.17 to 0.26)                 | 0.66                   |
| T2                                   |                                 | 36.3 (0.6)                      | 36.2 (0.5)           | 0.05 (-0.23 to 0.33)                 | 0.71                   |
| T3                                   |                                 | 36.2 (0.4)                      | 36.2 (0.5)           | -0.05 (-0.29 to 0.19)                | 0.66                   |
| T4                                   |                                 | 36.2 (0.4)                      | 36.3 (0.5)           | -0.03 (-0.29 to 0.22)                | 0.81                   |
| 2 <sup>nd</sup> Dressing Change      |                                 |                                 |                      |                                      |                        |
| T1                                   |                                 | 35.9 (0.4)                      | 35.9 (0.4)           | 0.02 (-0.21 to 0.25)                 | 0.85                   |
| T2                                   |                                 | 36.2 (0.4)                      | 36.3 (0.5)           | -0.08 (-0.35 to 0.25)                | 0.57                   |
| T3                                   |                                 | 36.3 (0.4)                      | 36.3 (0.4)           | -0.02 (-0.37 to 0.25)                | 0.9                    |
| T4                                   |                                 | 36.2 (0.4)                      | 36.3 (0.3)           | -0.16 (-0.43 to 0.25)                | 0.23                   |
| 3 <sup>rd</sup> Dressing Change      |                                 |                                 |                      |                                      |                        |
| T1                                   |                                 | 36.2 (0.9)                      | 36.1 (0.4)           | 0.19 (-0.44 to 0.83)                 | 0.53                   |
| T2                                   |                                 | 36.6 (0.6)                      | 36.4 (0.3)           | 0.18 (-0.27 to 0.63)                 | 0.4                    |
| T3                                   |                                 | 36.8 (0.4)                      | 36.2 (0.3)           | 0.52 (-0.02 to 1.06)                 | 0.06                   |
| T4                                   |                                 | 36.9 (0.5)                      | 36.4 (0.2)           | 0.5 (-0.02 to 1.02)                  | 0.06                   |
| Salivary $\alpha$ -amylase<br>(U/mL) |                                 | 1 <sup>st</sup> Dressing Change |                      | † Mean ( $\times$ /SD)               | † Mean ( $\times$ /SD) |
|                                      | T1                              | 39 (24 – 70)                    | 43 (23 – 65)         | 1.00 (0.65 to 1.56)                  | 0.97                   |
|                                      | 2 <sup>nd</sup> Dressing Change |                                 |                      |                                      |                        |
| T1                                   | 43 (17 – 106)                   | 28 (14 – 77)                    | 1.14 (0.48 to 2.71)  | 0.75                                 |                        |

1  
2  
3 SD = standard deviation; CI = confidence interval. U/mL = units per milliliter; T1 = timepoint 1; T2 = timepoint 2; T3 =  
4 timepoint 3; T4 = timepoint 4. \* Adjusted Mean Difference = Intervention Group – Control Group.  
5  
6  
7  
8  
9  
10  
11  
12  
13  
14  
15  
16  
17  
18  
19  
20  
21  
22  
23  
24  
25  
26  
27  
28  
29  
30  
31  
32  
33  
34  
35  
36  
37  
38  
39  
40  
41  
42  
43  
44  
45  
46  
47  
48  
49  
50  
51  
52  
53  
54  
55  
56  
57  
58  
59  
60

For peer review only

### Appendix C. Pain at dressing changes one, two, and three

| Pain Assessment Timepoint             | N (Intervention) | Intervention<br>Mean (SD) | N (Control) | Control<br>Mean (SD) | Adjusted Mean<br>Difference (95% CI) | <i>p</i> value |
|---------------------------------------|------------------|---------------------------|-------------|----------------------|--------------------------------------|----------------|
| <b>Nurse: FLACC (0 – 10)</b>          |                  |                           |             |                      |                                      |                |
| 1 <sup>st</sup> Dressing Change       |                  |                           |             |                      |                                      |                |
| T1                                    | 36               | 0.0 (0.0)                 | 33          | 0.0 (0.2)            | 0.0 (-0.1 to 0)                      | 0.3            |
| T2                                    | 34               | 1.3 (1.7)                 | 31          | 1.1 (1.6)            | 0.2 (-0.7 to 1.0)                    | 0.69           |
| T3                                    | 28               | 0.1 (0.3)                 | 29          | 0.1 (0.4)            | 0.0 (-0.2 to 0.2)                    | 0.73           |
| T4                                    | 28               | 0.4 (0.9)                 | 28          | 0.2 (0.5)            | 0.2 (-0.2 to 0.6)                    | 0.36           |
| Peak FLACC                            | 34               | 2.1 (1.9)                 | 31          | 1.7 (1.5)            | 0.3 (-0.5 to 1.2)                    | 0.41           |
| 2 <sup>nd</sup> Dressing Change       |                  |                           |             |                      |                                      |                |
| T1                                    | 26               | 0.0 (0.0)                 | 28          | 0.0 (0.0)            | 0.0 (0.0)                            | -              |
| T2                                    | 24               | 1.1 (1.7)                 | 27          | 0.6 (1.3)            | 0.5 (-0.4 to 1.3)                    | 0.25           |
| T3                                    | 12               | 0.0 (0.0)                 | 16          | 0.5 (1.5)            | -0.5 (-1.4 to 0.4)                   | 0.28           |
| T4                                    | 12               | 0.2 (0.4)                 | 14          | 0.3 (0.7)            | -0.1 (-0.6 to 0.4)                   | 0.62           |
| Peak FLACC                            | 24               | 1.6 (1.8)                 | 27          | 1.0 (1.6)            | 0.6 (-0.3 to 1.6)                    | 0.20           |
| 3 <sup>rd</sup> Dressing Change       |                  |                           |             |                      |                                      |                |
| T1                                    | 7                | 0.0 (0.0)                 | 14          | 0.0 (0.0)            | 0.0 (0.0)                            | -              |
| T2                                    | 7                | 0.1 (0.4)                 | 12          | 0.6 (0.7)            | -0.4 (-1.0 to 0.1)                   | 0.13           |
| T3                                    | 3                | 0.3 (0.6)                 | 7           | 0.4 (1.1)            | -0.1 (-1.7 to 1.5)                   | 0.9            |
| T4                                    | 3                | 0.0 (0.0)                 | 7           | 0.0 (0.0)            | 0.0 (0.0)                            | -              |
| Peak FLACC                            | 7                | 1.4 (1.4)                 | 13          | 0.8 (0.9)            | 0.6 (-0.5 to 1.7)                    | 0.27           |
| <b>Parent: VAS Observer (0 – 100)</b> |                  |                           |             |                      |                                      |                |
| 1 <sup>st</sup> Dressing Change       |                  |                           |             |                      |                                      |                |
| T1                                    | 34               | 8.2 (18.8)                | 32          | 3.4 (9.7)            | 5 (-3.0 to 12.0)                     | 0.2            |
| T2                                    | 33               | 31.5 (37.9)               | 31          | 18.5 (23.8)          | 13 (-3.0 to 29.0)                    | 0.11           |
| T3                                    | 27               | 18.9 (28.2)               | 29          | 9.7 (17.6)           | 9 (-3.0 to 22.0)                     | 0.14           |
| T4                                    | 27               | 19.1 (26.7)               | 28          | 7.1 (20.2)           | 12 (-1.0 to 25.0)                    | 0.07           |
| Peak VAS                              | 33               | 42.1 (35.2)               | 29          | 29.5 (22.3)          | 13 (-3.0 to 28.0)                    | 0.10           |
| 2 <sup>nd</sup> Dressing Change       |                  |                           |             |                      |                                      |                |
| T1                                    | 25               | 4.4 (11.6)                | 28          | 1.4 (4.5)            | 3 (-2.0 to 8.0)                      | 0.21           |
| T2                                    | 23               | 14.1 (23.2)               | 27          | 9.6 (20.5)           | 5 (-8.0 to 17.0)                     | 0.47           |
| T3                                    | 11               | 7.7 (19.9)                | 15          | 2.7 (4.6)            | 5 (-6.0 to 16.0)                     | 0.35           |
| T4                                    | 11               | 12.3 (21.1)               | 13          | 3.1 (8.5)            | 9 (-4.0 to 22.0)                     | 0.16           |
| Peak VAS                              | 22               | 21.4 (30.3)               | 26          | 13.8 (21.7)          | 8 (-8.0 to 22.0)                     | 0.32           |
| 3 <sup>rd</sup> Dressing Change       |                  |                           |             |                      |                                      |                |
| T1                                    | 7                | 4.3 (11.3)                | 13          | 2.3 (8.3)            | 2 (-7.0 to 11.0)                     | 0.66           |

1  
2  
3  
4  
5  
6  
7  
8  
9  
10  
11  
12  
13  
14  
15  
16  
17  
18  
19  
20  
21  
22  
23  
24  
25  
26  
27  
28  
29  
30  
31  
32  
33  
34  
35  
36  
37  
38  
39  
40  
41  
42  
43  
44  
45  
46  
47  
48  
49  
50  
51  
52  
53  
54  
55  
56  
57  
58  
59  
60

|          |   |             |    |             |                    |      |
|----------|---|-------------|----|-------------|--------------------|------|
| T2       | 6 | 11.7 (16.0) | 11 | 8.2 (10.8)  | 3 (-10.0 to 17.0)  | 0.60 |
| T3       | 6 | 5.0 (7.1)   | 7  | 8.6 (12.1)  | -4 (-25.0 to 18.0) | 0.71 |
| T4       | 3 | 0.0 (0.0)   | 6  | 3.3 (8.2)   | -3 (-18.0 to 12.0) | 0.60 |
| Peak VAS | 5 | 20.0 (14.1) | 11 | 11.8 (11.7) | 8 (-6.0 to 23.0)   | 0.24 |

**Child: FPS – R**1<sup>st</sup> Dressing Change

|              |   |             |    |           |                    |      |
|--------------|---|-------------|----|-----------|--------------------|------|
| T1           | 8 | 0.00 (0.00) | 10 | 0.1 (0.3) | -0.1 (-.3 to .1)   | 0.39 |
| T2           | 9 | 2.7 (4.4)   | 9  | 2.4 (3.4) | 0.2 (-3.7 to 4.1)  | 0.91 |
| T3           | 7 | 2.0 (3.5)   | 8  | 2.3 (3.6) | -0.2 (-4.2 to 3.7) | 0.89 |
| T4           | 7 | 0.3 (0.8)   | 6  | 1.0 (1.7) | -0.7 (-2.3 to .8)  | 0.33 |
| Peak FPS – R | 9 | 2.7 (4.1)   | 7  | 1.7 (2.1) | 1.0 (-2.7 to 4.6)  | 0.59 |

2<sup>nd</sup> Dressing Change

|              |   |             |   |           |                    |      |
|--------------|---|-------------|---|-----------|--------------------|------|
| T1           | 5 | 0.00 (0.00) | 6 | 1.7 (4.1) | -1.7 (-5.8 to 2.5) | 0.39 |
| T2           | 6 | 0.7 (1.6)   | 5 | 2.0 (4.5) | -1.3 (-5.7 to 3.1) | 0.51 |
| T3           | 3 | 0.00 (0.00) | 3 | 1.3 (2.3) | -1.3 (-5 to 2.4)   | 0.37 |
| T4           | 3 | 0.00 (0.00) | 3 | 1.3 (2.3) | -1.3 (-5 to 2.4)   | 0.37 |
| Peak FPS – R | 6 | 1.0 (1.7)   | 8 | 1.3 (3.5) | -0.2 (-3.7 to 3.2) | 0.88 |

3<sup>rd</sup> Dressing Change

|              |   |             |   |           |                      |      |
|--------------|---|-------------|---|-----------|----------------------|------|
| T1           | 2 | 0.00 (0.00) | 3 | 3.3 (5.8) | -3.3 (-17 to 10.4)   | 0.50 |
| T2           | 2 | 1.0 (1.4)   | 3 | 3.3 (5.8) | -2.3 (-16.2 to 11.6) | 0.63 |
| T3           | 2 | 1.0 (1.4)   | 2 | 0.0 (0.0) | 1.0 (-3.3 to 5.3)    | 0.42 |
| T4           | 2 | 2.0 (2.8)   | 0 | -         | -                    | -    |
| Peak FPS – R | 2 | 3.0 (1.4)   | 3 | 3.3 (5.8) | -0.3 (-14.2 to 13.6) | 0.94 |

**Child: VAS**1<sup>st</sup> Dressing Change

|          |   |             |   |             |                |      |
|----------|---|-------------|---|-------------|----------------|------|
| T1       | 8 | 21.9 (27.5) | 7 | 7.1 (15.0)  | 15 (-11 to 40) | 0.23 |
| T2       | 7 | 45.7 (41.6) | 5 | 8.0 (11.0)  | 38 (-5 to 81)  | 0.08 |
| T3       | 6 | 33.3 (37.8) | 4 | 30.0 (47.6) | 3 (-59 to 65)  | 0.90 |
| T4       | 5 | 28.0 (25.9) | 4 | 25.0 (50.0) | 3 (-57 to 63)  | 0.91 |
| Peak VAS | 8 | 52.5 (41.)  | 6 | 23.3 (40.8) | 29 (-19 to 77) | 0.21 |

2<sup>nd</sup> Dressing Change

|          |   |             |   |            |                |      |
|----------|---|-------------|---|------------|----------------|------|
| T1       | 8 | 16.3 (22.0) | 5 | 4.0 (8.9)  | 12 (-11 to 35) | 0.27 |
| T2       | 7 | 27.9 (27.4) | 5 | 4.0 (8.9)  | 24 (-5 to 52)  | 0.09 |
| T3       | 5 | 16.0 (26.1) | 3 | 6.7 (11.5) | 9 (-31 to 49)  | 0.59 |
| T4       | 5 | 12.0 (17.9) | 3 | 0.0 (0.0)  | 12 (-14 to 38) | 0.30 |
| Peak VAS | 8 | 34.4 (31.3) | 7 | 5.7 (9.8)  | 29 (2 to 55)   | 0.04 |

3<sup>rd</sup> Dressing Change

|    |   |            |   |           |              |      |
|----|---|------------|---|-----------|--------------|------|
| T1 | 3 | 8.3 (14.4) | 2 | 0.0 (0.0) | 8 (-26 – 43) | 0.50 |
|----|---|------------|---|-----------|--------------|------|

|          |   |             |   |            |                 |        |
|----------|---|-------------|---|------------|-----------------|--------|
| T2       | 3 | 26.7 (25.2) | 2 | 15.0 (7.1) | 12 (-49 to 73)  | 0.58   |
| T3       | 2 | 5.0 (7.1)   | 2 | 5.0 (7.1)  | 0 (-30 to 30)   | > 0.99 |
| T4       | 2 | 20.0 (28.3) | 2 | 0.0 (0.0)  | 20 (-66 to 106) | 0.42   |
| Peak VAS | 2 | 40.0 (14.1) | 2 | 15.0 (7.1) | 25 (-23 to 73)  | 0.15   |

\* Adjusted Mean Difference = Intervention Group – Control Group. FLACC = face, legs, activity, cry, consolability scale; VAS = visual analogue scale; FPS-R = faces pain scale revises; SD = standard deviation; CI = confidence interval; T1 = timepoint 1; T2 = timepoint 2; T3 = timepoint 3; T4 = timepoint 4.

For peer review only

**Appendix D. Staff and caregiver perspectives on dressings**

| Assessor        | Dressing Measure             | Control (PVC film) |             | Intervention (HBD) |             | <i>p</i> value |
|-----------------|------------------------------|--------------------|-------------|--------------------|-------------|----------------|
|                 |                              | N                  | Mean (SD)   | N                  | Mean (SD)   |                |
| <b>ED Staff</b> |                              |                    |             |                    |             |                |
|                 | Ease of dressing application | 8                  | 8.00 (1.85) | 15                 | 9.53 (0.99) | 0.056          |
|                 | Ease of dressing removal     | 9                  | 9.78 (0.67) | 16                 | 9.88 (0.50) | 0.709          |
|                 | Flexibility                  | 9                  | 8.22 (1.99) | 16                 | 9.56 (0.73) | 0.082          |
|                 | Conformity                   | 9                  | 7.89 (2.09) | 16                 | 8.44 (1.50) | 0.500          |
| <b>Parents</b>  |                              |                    |             |                    |             |                |
|                 | Ease of dressing application | 16                 | 7.63 (2.66) | 24                 | 9.54 (0.88) | 0.013          |
|                 | Ease of dressing removal     | 16                 | 8.62 (2.28) | 24                 | 9.88 (0.34) | 0.045          |
|                 | Comfort                      | 16                 | 8.19 (2.61) | 24                 | 8.96 (1.88) | 0.318          |
|                 | Ease of movement             | 16                 | 7.81 (2.59) | 24                 | 9.29 (1.30) | 0.047          |

ED = emergency department; PVC = polyvinylchloride film; HBD = hydrogel burn dressing; N = number of participants; SD = standard deviation

### Appendix E. Pain score frequencies during acute care in the ED

| Pain Scale and Timepoint    | Pain Score | N (Intervention) | Burnaid® N (%) | N (Control)   | Plastic Wrap N (%) |
|-----------------------------|------------|------------------|----------------|---------------|--------------------|
| <b>FLACC (0 – 10 scale)</b> |            | <i>n</i> = 35    |                | <i>n</i> = 23 |                    |
| T1                          | 0          |                  | 18 (51%)       |               | 16 (70%)           |
|                             | 1          |                  | 9 (26%)        |               | 3 (13%)            |
|                             | 2          |                  | 4 (11%)        |               | 2 (9%)             |
|                             | 3          |                  | 1 (3%)         |               | 1 (4%)             |
|                             | 5          |                  | 1 (3%)         |               | 0 (0%)             |
|                             | 6          |                  | 1 (3%)         |               | 1 (4%)             |
|                             | 10         |                  | 1 (3%)         |               | 0 (0%)             |
| T2                          |            | <i>n</i> = 36    |                | <i>n</i> = 35 |                    |
|                             | 0          |                  | 30 (83%)       |               | 26 (74%)           |
|                             | 1          |                  | 1 (3%)         |               | 5 (14%)            |
|                             | 2          |                  | 3 (8%)         |               | 4 (11%)            |
|                             | 3          |                  | 1 (3%)         |               | 0 (0%)             |
|                             | 4          |                  | 1 (3%)         |               | 0 (0%)             |
| T3                          |            | <i>n</i> = 36    |                | <i>n</i> = 34 |                    |
|                             | 0          |                  | 31 (86%)       |               | 24 (71%)           |
|                             | 1          |                  | 1 (3%)         |               | 5 (15%)            |
|                             | 2          |                  | 2 (6%)         |               | 4 (12%)            |
|                             | 3          |                  | 1 (3%)         |               | 0 (0%)             |
|                             | 6          |                  | 1 (3%)         |               | 0 (0%)             |
|                             | 9          |                  | 0 (0%)         |               | 1 (3%)             |
| T4                          |            | <i>n</i> = 35    |                | <i>n</i> = 33 |                    |
|                             | 0          |                  | 26 (74%)       |               | 24 (73%)           |
|                             | 1          |                  | 2 (6%)         |               | 2 (6%)             |
|                             | 2          |                  | 3 (9%)         |               | 4 (12%)            |
|                             | 3          |                  | 1 (3%)         |               | 1 (3%)             |
|                             | 4          |                  | 2 (6%)         |               | 1 (3%)             |
|                             | 7          |                  | 0 (0%)         |               | 1 (3%)             |
|                             | 8          |                  | 1 (3%)         |               | 0 (0%)             |
| Peak FLACC                  |            | <i>n</i> = 36    |                | <i>n</i> = 34 |                    |
|                             | 0          |                  | 5 (14%)        |               | 4 (12%)            |
|                             | 1          |                  | 3 (8%)         |               | 4 (12%)            |
|                             | 2          |                  | 7 (19%)        |               | 3 (9%)             |
|                             | 3          |                  | 6 (17%)        |               | 4 (12%)            |



1  
2  
3  
4  
5  
6  
7  
8  
9  
10  
11  
12  
13  
14  
15  
16  
17  
18  
19  
20  
21  
22  
23  
24  
25  
26  
27  
28  
29  
30  
31  
32  
33  
34  
35  
36  
37  
38  
39  
40  
41  
42  
43  
44  
45  
46  
47  
48  
49  
50  
51  
52  
53  
54  
55  
56  
57  
58  
59  
60

|  |                                     | 4             | 5 (14%)  | 7 (21%)       |
|--|-------------------------------------|---------------|----------|---------------|
|  |                                     | 5             | 2 (6%)   | 2 (6%)        |
|  |                                     | 6             | 3 (8%)   | 4 (12%)       |
|  |                                     | 7             | 2 (6%)   | 1 (3%)        |
|  |                                     | 8             | 3 (8%)   | 3 (9%)        |
|  |                                     | 9             | 0 (0%)   | 1 (3%)        |
|  |                                     | 10            | 0 (0%)   | 1 (3%)        |
|  | <b>Observer VAS (0 – 100 scale)</b> |               |          |               |
|  |                                     | <i>n</i> = 34 |          | <i>n</i> = 22 |
|  | T1                                  | 0             | 9 (26%)  | 4 (18%)       |
|  |                                     | 10            | 3 (9%)   | 3 (14%)       |
|  |                                     | 20            | 4 (12%)  | 1 (5%)        |
|  |                                     | 30            | 4 (12%)  | 3 (14%)       |
|  |                                     | 40            | 4 (12%)  | 6 (27%)       |
|  |                                     | 50            | 0 (0%)   | 4 (18%)       |
|  |                                     | 55            | 1 (3%)   | 0 (0%)        |
|  |                                     | 60            | 4 (12%)  | 0 (0%)        |
|  |                                     | 70            | 3 (9%)   | 0 (0%)        |
|  |                                     | 80            | 1 (3%)   | 1 (5%)        |
|  |                                     | 100           | 1 (3%)   | 0 (0%)        |
|  | T2                                  | <i>n</i> = 34 |          | <i>n</i> = 31 |
|  |                                     | 0             | 14 (41%) | 10 (32%)      |
|  |                                     | 10            | 1 (3%)   | 3 (10%)       |
|  |                                     | 20            | 6 (18%)  | 5 (16%)       |
|  |                                     | 25            | 0 (0%)   | 1 (3%)        |
|  |                                     | 30            | 4 (12%)  | 5 (16%)       |
|  |                                     | 35            | 0 (0%)   | 1 (3%)        |
|  |                                     | 40            | 2 (6%)   | 2 (6%)        |
|  |                                     | 50            | 1 (3%)   | 2 (6%)        |
|  |                                     | 60            | 4 (12%)  | 2 (6%)        |
|  |                                     | 70            | 2 (6%)   | 0 (0%)        |
|  | T3                                  | <i>n</i> = 35 |          | <i>n</i> = 34 |
|  |                                     | 0             | 15 (43%) | 14 (41%)      |
|  |                                     | 10            | 2 (6%)   | 7 (21%)       |
|  |                                     | 20            | 7 (20%)  | 4 (12%)       |
|  |                                     | 30            | 5 (14%)  | 3 (9%)        |
|  |                                     | 40            | 1 (3%)   | 1 (3%)        |
|  |                                     | 50            | 2 (6%)   | 2 (6%)        |
|  |                                     | 60            | 3 (9%)   | 1 (3%)        |

1  
2  
3  
4  
5  
6  
7  
8  
9  
10  
11  
12  
13  
14  
15  
16  
17  
18  
19  
20  
21  
22  
23  
24  
25  
26  
27  
28  
29  
30  
31  
32  
33  
34  
35  
36  
37  
38  
39  
40  
41  
42  
43  
44  
45  
46  
47  
48  
49  
50  
51  
52  
53  
54  
55  
56  
57  
58  
59  
60

|  |                               | 80  | 0 (0%)        | 1 (3%)        |
|--|-------------------------------|-----|---------------|---------------|
|  |                               | 100 | 0 (0%)        | 1 (3%)        |
|  | T4                            |     | <i>n</i> = 33 | <i>n</i> = 32 |
|  |                               | 0   | 12 (36%)      | 16 (50%)      |
|  |                               | 10  | 2 (6%)        | 4 (13%)       |
|  |                               | 20  | 6 (18%)       | 5 (16%)       |
|  |                               | 30  | 4 (12%)       | 0 (0%)        |
|  |                               | 40  | 1 (3%)        | 1 (3%)        |
|  |                               | 50  | 3 (9%)        | 2 (6%)        |
|  |                               | 60  | 4 (12%)       | 2 (6%)        |
|  |                               | 70  | 0 (0%)        | 1 (3%)        |
|  |                               | 100 | 1 (3%)        | 1 (3%)        |
|  | <b>FPS – R (0 – 10 scale)</b> |     | <i>n</i> = 9  | <i>n</i> = 7  |
|  | T1                            | 0   | 4 (44%)       | 1 (14%)       |
|  |                               | 2   | 0 (0%)        | 2 (29%)       |
|  |                               | 4   | 3 (33%)       | 2 (29%)       |
|  |                               | 5   | 0 (0%)        | 1 (14%)       |
|  |                               | 8   | 1 (11%)       | 1 (14%)       |
|  |                               | 10  | 1 (11%)       | 0 (0%)        |
|  | T2                            |     | <i>n</i> = 10 | <i>n</i> = 9  |
|  |                               | 0   | 6 (60%)       | 4 (44%)       |
|  |                               | 2   | 1 (10%)       | 2 (22%)       |
|  |                               | 4   | 0 (0%)        | 1 (11%)       |
|  |                               | 6   | 1 (10%)       | 1 (11%)       |
|  |                               | 8   | 0 (0%)        | 1 (11%)       |
|  |                               | 10  | 2 (20%)       | 0 (0%)        |
|  | T3                            |     | <i>n</i> = 11 | <i>n</i> = 11 |
|  |                               | 0   | 8 (73%)       | 9 (82%)       |
|  |                               | 1   | 1 (9%)        | 0 (0%)        |
|  |                               | 4   | 0 (0%)        | 1 (9%)        |
|  |                               | 6   | 1 (9%)        | 0 (0%)        |
|  |                               | 10  | 1 (9%)        | 1 (9%)        |
|  | T4                            |     | <i>n</i> = 10 | <i>n</i> = 10 |
|  |                               | 0   | 4 (40%)       | 5 (50%)       |
|  |                               | 1   | 1 (10%)       | 0 (0%)        |
|  |                               | 2   | 1 (10%)       | 2 (20%)       |
|  |                               | 4   | 1 (10%)       | 0 (0%)        |

|  |                                              | 6             | 2 (20%) | 1 (10%)      |
|--|----------------------------------------------|---------------|---------|--------------|
|  |                                              | 10            | 1 (10%) | 2 (20%)      |
|  | <b>Child Self-report VAS (0 – 100 scale)</b> | <i>n</i> = 9  |         | <i>n</i> = 2 |
|  | T1                                           | 0             | 2 (22%) | 0 (0%)       |
|  |                                              | 10            | 0 (0%)  | 1 (50%)      |
|  |                                              | 20            | 1 (11%) | 0 (0%)       |
|  |                                              | 30            | 1 (11%) | 1 (50%)      |
|  |                                              | 40            | 1 (11%) | 0 (0%)       |
|  |                                              | 50            | 2 (22%) | 0 (0%)       |
|  |                                              | 70            | 1 (11%) | 0 (0%)       |
|  |                                              | 85            | 1 (11%) | 0 (0%)       |
|  | T2                                           | <i>n</i> = 10 |         | <i>n</i> = 4 |
|  |                                              | 0             | 4 (40%) | 1 (25%)      |
|  |                                              | 10            | 0 (0%)  | 1 (25%)      |
|  |                                              | 20            | 3 (30%) | 1 (25%)      |
|  |                                              | 30            | 1 (10%) | 0 (0%)       |
|  |                                              | 50            | 1 (10%) | 0 (0%)       |
|  |                                              | 60            | 1 (10%) | 0 (0%)       |
|  |                                              | 80            | 0 (0%)  | 1 (25%)      |
|  | T3                                           | <i>n</i> = 11 |         | <i>n</i> = 5 |
|  |                                              | 0             | 5 (45%) | 4 (80%)      |
|  |                                              | 10            | 1 (9%)  | 0 (0%)       |
|  |                                              | 20            | 3 (27%) | 0 (0%)       |
|  |                                              | 40            | 0 (0%)  | 1 (20%)      |
|  |                                              | 50            | 1 (9%)  | 0 (0%)       |
|  |                                              | 60            | 1 (9%)  | 0 (0%)       |
|  | T4                                           | <i>n</i> = 7  |         | <i>n</i> = 4 |
|  |                                              | 0             | 2 (29%) | 2 (50%)      |
|  |                                              | 10            | 0 (0%)  | 1 (25%)      |
|  |                                              | 20            | 1 (14%) | 0 (0%)       |
|  |                                              | 40            | 2 (29%) | 0 (0%)       |
|  |                                              | 55            | 1 (14%) | 0 (0%)       |
|  |                                              | 60            | 1 (14%) | 0 (0%)       |
|  |                                              | 90            | 0 (0%)  | 1 (25%)      |

N = number of participants; FLACC = face, legs, activity, cry, consolability scale; VAS = visual analogue scale; FPS-R = faces pain scale revises; Ag = silver dressing; T1 = timepoint 1; T2 = timepoint 2; T3 = timepoint 3; T4 = timepoint 4.

1  
2  
3  
4  
5  
6  
7

## CONSORT Reporting Checklist for Randomised Trials

|                           | Reporting Item                                                                                                                                                                    | Page Number    |
|---------------------------|-----------------------------------------------------------------------------------------------------------------------------------------------------------------------------------|----------------|
| <b>Title and Abstract</b> |                                                                                                                                                                                   |                |
| Title                     | <a href="#">#1a</a> Identification as a randomized trial in the title.                                                                                                            | 0 (Title Page) |
| Abstract                  | <a href="#">#1b</a> Structured summary of trial design, methods, results, and conclusions                                                                                         | 1 - 2          |
| <b>Introduction</b>       |                                                                                                                                                                                   |                |
| Background and objectives | <a href="#">#2a</a> Scientific background and explanation of rationale                                                                                                            | 3 - 4          |
| Background and objectives | <a href="#">#2b</a> Specific objectives or hypothesis                                                                                                                             | 3 - 4          |
| <b>Methods</b>            |                                                                                                                                                                                   |                |
| Trial design              | <a href="#">#3a</a> Description of trial design (such as parallel, factorial) including allocation ratio.                                                                         | 4              |
| Trial design              | <a href="#">#3b</a> Important changes to methods after trial commencement (such as eligibility criteria), with reasons                                                            | 8              |
| Participants              | <a href="#">#4a</a> Eligibility criteria for participants                                                                                                                         | 5              |
| Participants              | <a href="#">#4b</a> Settings and locations where the data were collected                                                                                                          | 4              |
| Interventions             | <a href="#">#5</a> The experimental and control interventions for each group with sufficient details to allow replication, including how and when they were actually administered | 5 - 7          |
| Outcomes                  | <a href="#">#6a</a> Completely defined prespecified primary and secondary outcome measures, including how and when they were assessed                                             | 7 - 9          |
| Outcomes                  | <a href="#">#6b</a> Any changes to trial outcomes after the trial commenced, with reasons                                                                                         | NA             |
| Sample size               | <a href="#">#7a</a> How sample size was determined.                                                                                                                               | 9              |

|    |                          |                      |                                                                                     |         |
|----|--------------------------|----------------------|-------------------------------------------------------------------------------------|---------|
| 1  | Sample size              | <a href="#">#7b</a>  | When applicable, explanation of any interim analyses and stopping guidelines        | NA      |
| 2  |                          |                      |                                                                                     |         |
| 3  |                          |                      |                                                                                     |         |
| 4  |                          |                      |                                                                                     |         |
| 5  | Randomization -          | <a href="#">#8a</a>  | Method used to generate the random allocation sequence.                             | 5 - 6   |
| 6  | Sequence generation      |                      |                                                                                     |         |
| 7  |                          |                      |                                                                                     |         |
| 8  |                          |                      |                                                                                     |         |
| 9  | Randomization -          | <a href="#">#8b</a>  | Type of randomization; details of any restriction (such as blocking and block size) | NA      |
| 10 | Sequence generation      |                      |                                                                                     |         |
| 11 |                          |                      |                                                                                     |         |
| 12 |                          |                      |                                                                                     |         |
| 13 | Randomization -          | <a href="#">#9</a>   | Mechanism used to implement the random allocation                                   | 5 - 6   |
| 14 | Allocation concealment   |                      | sequence (such as sequentially numbered containers),                                |         |
| 15 | mechanism                |                      | describing any steps taken to conceal the sequence until                            |         |
| 16 |                          |                      | interventions were assigned                                                         |         |
| 17 |                          |                      |                                                                                     |         |
| 18 |                          |                      |                                                                                     |         |
| 19 |                          |                      |                                                                                     |         |
| 20 | Randomization -          | <a href="#">#10</a>  | Who generated the allocation sequence, who enrolled                                 | 5 - 6   |
| 21 | Implementation           |                      | participants, and who assigned participants to interventions                        |         |
| 22 |                          |                      |                                                                                     |         |
| 23 |                          |                      |                                                                                     |         |
| 24 | Blinding                 | <a href="#">#11a</a> | If done, who was blinded after assignment to interventions                          | 5 - 6   |
| 25 |                          |                      | (for example, participants, care providers, those assessing                         |         |
| 26 |                          |                      | outcomes) and how.                                                                  |         |
| 27 |                          |                      |                                                                                     |         |
| 28 |                          |                      |                                                                                     |         |
| 29 |                          |                      |                                                                                     |         |
| 30 | Blinding                 | <a href="#">#11b</a> | If relevant, description of the similarity of interventions                         | 3       |
| 31 |                          |                      |                                                                                     |         |
| 32 | Statistical methods      | <a href="#">#12a</a> | Statistical methods used to compare groups for primary and                          | 9 - 10  |
| 33 |                          |                      | secondary outcomes                                                                  |         |
| 34 |                          |                      |                                                                                     |         |
| 35 |                          |                      |                                                                                     |         |
| 36 | Statistical methods      | <a href="#">#12b</a> | Methods for additional analyses, such as subgroup analyses                          | 10      |
| 37 |                          |                      | and adjusted analyses                                                               |         |
| 38 |                          |                      |                                                                                     |         |
| 39 |                          |                      |                                                                                     |         |
| 40 | <b>Results</b>           |                      |                                                                                     |         |
| 41 |                          |                      |                                                                                     |         |
| 42 | Participant flow diagram | <a href="#">#13a</a> | For each group, the numbers of participants who were                                | 5       |
| 43 | (strongly recommended)   |                      | randomly assigned, received intended treatment, and were                            |         |
| 44 |                          |                      | analysed for the primary outcome                                                    |         |
| 45 |                          |                      |                                                                                     |         |
| 46 |                          |                      |                                                                                     |         |
| 47 |                          |                      |                                                                                     |         |
| 48 | Participant flow         | <a href="#">#13b</a> | For each group, losses and exclusions after randomization,                          | 5       |
| 49 |                          |                      | together with reason                                                                |         |
| 50 |                          |                      |                                                                                     |         |
| 51 |                          |                      |                                                                                     |         |
| 52 | Recruitment              | <a href="#">#14a</a> | Dates defining the periods of recruitment and follow-up                             | 4       |
| 53 |                          |                      |                                                                                     |         |
| 54 | Recruitment              | <a href="#">#14b</a> | Why the trial ended or was stopped                                                  | NA      |
| 55 |                          |                      |                                                                                     |         |
| 56 |                          |                      |                                                                                     |         |
| 57 | Baseline data            | <a href="#">#15</a>  | A table showing baseline demographic and clinical                                   | 11 - 13 |
| 58 |                          |                      | characteristics for each group                                                      |         |
| 59 |                          |                      |                                                                                     |         |
| 60 |                          |                      |                                                                                     |         |

|    |                          |                      |                                                                 |         |
|----|--------------------------|----------------------|-----------------------------------------------------------------|---------|
| 1  | Numbers analysed         | <a href="#">#16</a>  | For each group, number of participants (denominator)            | 11 - 18 |
| 2  |                          |                      | included in each analysis and whether the analysis was by       |         |
| 3  |                          |                      | original assigned groups                                        |         |
| 4  |                          |                      |                                                                 |         |
| 5  |                          |                      |                                                                 |         |
| 6  | Outcomes and estimation  | <a href="#">#17a</a> | For each primary and secondary outcome, results for each        | 14 – 18 |
| 7  |                          |                      | group, and the estimated effect size and its precision (such as |         |
| 8  |                          |                      | 95% confidence interval)                                        |         |
| 9  |                          |                      |                                                                 |         |
| 10 |                          |                      |                                                                 |         |
| 11 |                          |                      |                                                                 |         |
| 12 | Outcomes and estimation  | <a href="#">#17b</a> | For binary outcomes, presentation of both absolute and          | NA      |
| 13 |                          |                      | relative effect sizes is recommended                            |         |
| 14 |                          |                      |                                                                 |         |
| 15 |                          |                      |                                                                 |         |
| 16 | Ancillary analyses       | <a href="#">#18</a>  | Results of any other analyses performed, including subgroup     | 15 - 18 |
| 17 |                          |                      | analyses and adjusted analyses, distinguishing pre-specified    |         |
| 18 |                          |                      | from exploratory                                                |         |
| 19 |                          |                      |                                                                 |         |
| 20 |                          |                      |                                                                 |         |
| 21 | Harms                    | <a href="#">#19</a>  | All important harms or unintended effects in each group (For    | 13      |
| 22 |                          |                      | specific guidance see CONSORT for harms)                        |         |
| 23 |                          |                      |                                                                 |         |
| 24 |                          |                      |                                                                 |         |
| 25 |                          |                      |                                                                 |         |
| 26 | <b>Discussion</b>        |                      |                                                                 |         |
| 27 |                          |                      |                                                                 |         |
| 28 | Limitations              | <a href="#">#20</a>  | Trial limitations, addressing sources of potential bias,        | 19      |
| 29 |                          |                      | imprecision, and, if relevant, multiplicity of analyses         |         |
| 30 |                          |                      |                                                                 |         |
| 31 |                          |                      |                                                                 |         |
| 32 | Interpretation           | <a href="#">#22</a>  | Interpretation consistent with results, balancing benefits and  | 19 – 20 |
| 33 |                          |                      | harms, and considering other relevant evidence                  |         |
| 34 |                          |                      |                                                                 |         |
| 35 |                          |                      |                                                                 |         |
| 36 | Registration             | <a href="#">#23</a>  | Registration number and name of trial registry                  | 4       |
| 37 |                          |                      |                                                                 |         |
| 38 |                          |                      |                                                                 |         |
| 39 | <b>Other Information</b> |                      |                                                                 |         |
| 40 |                          |                      |                                                                 |         |
| 41 | Protocol                 | <a href="#">#24</a>  | Where the full trial protocol can be accessed, if available     | 4       |
| 42 |                          |                      |                                                                 |         |
| 43 | Funding                  | <a href="#">#25</a>  | Sources of funding and other support (such as supply of         | 24      |
| 44 |                          |                      | drugs), role of funders                                         |         |
| 45 |                          |                      |                                                                 |         |
| 46 |                          |                      |                                                                 |         |

47 Based on the CONSORT guidelines

48  
49 Schulz KF, Altman DG, Moher D, for the CONSORT Group. CONSORT 2010 Statement: updated guidelines for  
50 reporting parallel group randomised trials  
51  
52  
53  
54  
55  
56  
57  
58  
59  
60

# BMJ Open

## Effectiveness of a hydrogel dressing as an analgesic adjunct to first aid for the treatment of acute paediatric burn injuries: A prospective randomised controlled trial

|                                 |                                                                                                                                                                                                                                                                                                                                                                                                                                                                                                                                                                                                                                     |
|---------------------------------|-------------------------------------------------------------------------------------------------------------------------------------------------------------------------------------------------------------------------------------------------------------------------------------------------------------------------------------------------------------------------------------------------------------------------------------------------------------------------------------------------------------------------------------------------------------------------------------------------------------------------------------|
| Journal:                        | <i>BMJ Open</i>                                                                                                                                                                                                                                                                                                                                                                                                                                                                                                                                                                                                                     |
| Manuscript ID                   | bmjopen-2020-039981.R3                                                                                                                                                                                                                                                                                                                                                                                                                                                                                                                                                                                                              |
| Article Type:                   | Original research                                                                                                                                                                                                                                                                                                                                                                                                                                                                                                                                                                                                                   |
| Date Submitted by the Author:   | 16-Dec-2020                                                                                                                                                                                                                                                                                                                                                                                                                                                                                                                                                                                                                         |
| Complete List of Authors:       | Holbert, Maleea; Queensland Health Centre for Children's Health Research, Centre for Children's Burns and Trauma Research; The University of Queensland Faculty of Medicine<br>Kimble, Roy; Queensland Health Centre for Children's Health Research, Centre for Children's Burns and Trauma Research; The University of Queensland Faculty of Medicine<br>Chatfield, Mark; The University of Queensland Faculty of Medicine<br>Griffin, Bronwyn; Queensland Health Centre for Children's Health Research, Centre for Children's Burns and Trauma Research; Queensland University of Technology Faculty of Health, School of Nursing |
| <b>Primary Subject Heading</b>: | Paediatrics                                                                                                                                                                                                                                                                                                                                                                                                                                                                                                                                                                                                                         |
| Secondary Subject Heading:      | Emergency medicine, Anaesthesia                                                                                                                                                                                                                                                                                                                                                                                                                                                                                                                                                                                                     |
| Keywords:                       | PAEDIATRICS, PAIN MANAGEMENT, ACCIDENT & EMERGENCY MEDICINE, WOUND MANAGEMENT                                                                                                                                                                                                                                                                                                                                                                                                                                                                                                                                                       |
|                                 |                                                                                                                                                                                                                                                                                                                                                                                                                                                                                                                                                                                                                                     |

SCHOLARONE™  
Manuscripts



I, the Submitting Author has the right to grant and does grant on behalf of all authors of the Work (as defined in the below author licence), an exclusive licence and/or a non-exclusive licence for contributions from authors who are: i) UK Crown employees; ii) where BMJ has agreed a CC-BY licence shall apply, and/or iii) in accordance with the terms applicable for US Federal Government officers or employees acting as part of their official duties; on a worldwide, perpetual, irrevocable, royalty-free basis to BMJ Publishing Group Ltd ("BMJ") its licensees and where the relevant Journal is co-owned by BMJ to the co-owners of the Journal, to publish the Work in this journal and any other BMJ products and to exploit all rights, as set out in our [licence](#).

The Submitting Author accepts and understands that any supply made under these terms is made by BMJ to the Submitting Author unless you are acting as an employee on behalf of your employer or a postgraduate student of an affiliated institution which is paying any applicable article publishing charge ("APC") for Open Access articles. Where the Submitting Author wishes to make the Work available on an Open Access basis (and intends to pay the relevant APC), the terms of reuse of such Open Access shall be governed by a Creative Commons licence – details of these licences and which [Creative Commons](#) licence will apply to this Work are set out in our licence referred to above.

Other than as permitted in any relevant BMJ Author's Self Archiving Policies, I confirm this Work has not been accepted for publication elsewhere, is not being considered for publication elsewhere and does not duplicate material already published. I confirm all authors consent to publication of this Work and authorise the granting of this licence.



**Title**

Effectiveness of a hydrogel dressing as an analgesic adjunct to first aid for the treatment of acute paediatric burn injuries: A prospective randomised controlled trial

**Authors**

Maleea D. Holbert<sup>1,2,3</sup>, Roy M. Kimble<sup>1,2,3,4</sup>, Mark D. Chatfield<sup>3</sup>, Bronwyn R. Griffin<sup>1,2,4,5</sup>

**Affiliations**

<sup>1</sup> Centre for Children's Burns and Trauma Research, Centre for Children's Health Research, South Brisbane, Queensland, Australia 4101

<sup>2</sup> Pegg Leditschke Paediatric Burns Centre, The Queensland Children's Hospital, South Brisbane, Queensland, Australia 4101

<sup>3</sup> Faculty of Medicine, The University of Queensland, Brisbane, Queensland, Australia 4072

<sup>4</sup> Faculty of Health, School of Nursing, Queensland University of Technology, Brisbane, Queensland, Australia 4059

<sup>5</sup> Institute of Health and Biomedical Innovation, Queensland University of Technology, Brisbane, Queensland, Australia 4059

**Corresponding author:**

Maleea D. Holbert: [m.holbert@uq.edu.au](mailto:m.holbert@uq.edu.au)

Centre for Children's Burns and Trauma Research, Level 7 Centre for Children's Health Research, 62 Graham Street, South Brisbane, QLD 4101, Australia.

Telephone: +61 3069 7433

**Co-authors' email addresses**

Roy Kimble: [royk@uq.edu.au](mailto:royk@uq.edu.au)

Mark Chatfield: [m.chatfield@uq.edu.au](mailto:m.chatfield@uq.edu.au)

Bronwyn Griffin: [b.griffin@uq.edu.au](mailto:b.griffin@uq.edu.au)

## Abstract

### *Objective*

To compare the effectiveness of two acute burn dressings, Burnaid® hydrogel dressing and plasticised polyvinylchloride film, on reducing acute pain scores in paediatric burn patients following appropriate first aid.

### *Design*

Single-centre, superiority, two-arm, parallel-group, prospective randomised controlled trial.

### *Participants and Setting*

Paediatric patients (aged  $\leq 16$ ) presenting to the Emergency Department at the Queensland Children's Hospital, Brisbane, Australia, with an acute thermal burn were approached for participation in the trial from September 2017 – September 2018.

### *Interventions*

Patients were randomised to receive either (1) Burnaid® hydrogel dressing (Intervention) or (2) plasticised polyvinylchloride film (Control) as an acute burn dressing.

### *Primary and Secondary Outcomes*

Observational pain scores from nursing staff assessed 5-minutes post-application of the randomised dressing, measured using the Face Legs Activity Cry and Consolability Scale was the primary outcome. Repeated measures of pain, stress, and re-epithelialisation were also collected at follow-up dressing changes until 95% wound re-epithelialisation occurred.

### *Results*

Seventy-two children were recruited and randomised ( $n = 37$  Intervention;  $n = 35$  Control). No significant between-group differences in nursing (Mean Difference: -0.1, 95% CI: -0.7 to 0.5,  $p = 0.72$ ) or caregiver (MD: 1, 95% CI: -8 to 11,  $p = 0.78$ ) observational pain scores were identified. Moreover, no significant differences in child self-report pain (MD: 0.3, 95% CI: -1.7 to 2.2,  $p = 0.78$ ), heart rate (MD: -3, 95% CI: -11 to 5,  $p = 0.41$ ), temperature, (MD: 0.6, 95% CI: -0.13 to 0.24,  $p = 0.53$ ), stress (Geometric Mean Ratio: 1.53, 95% CI: 0.93 to 2.53,  $p = 0.10$ ), or re-epithelialisation rates (MD: -1, 95% CI: -3 to 1,  $p = 0.26$ ) were identified between the two groups.

## Conclusions

A clear benefit of Burnaid® hydrogel dressing as an analgesic adjunct to first aid for the treatment of acute paediatric burns was not identified in this investigation.

## Trial Registration

Australia and New Zealand Clinical Trials Register (ACTRN): ACTRN12617001274369

## Article Summary

### *Strengths and limitations of this study*

- First randomised controlled trial investigating analgesic properties of acute burn dressings in a paediatric burn population
- Pain was assessed using age-specific and reliable self-report and observational scales, in addition to physiological measures of pain and distress.
- This investigation was pragmatic in nature, replicating real-world clinical scenarios where acute burn dressings are used.
- Lack of representativeness within the patient sample (small to medium sized burns in children aged between 0 – 5 years) may limit generalisability of the findings to the broader paediatric burn population.

### *Key Words*

Burns, Paediatric Emergency Medicine, Randomised Controlled Trial, Pain

## 1. Introduction

Pain remains a major issue following a burn, and research suggests that pain from burn injuries continues to be undertreated in children [1]. The subsequent wound care required to treat a burn is also associated with significant pain and distress – thus burn pain comprises a challenging spectrum of acute, background, breakthrough, and procedural pain [2, 3]. The aim of this trial was to provide health practitioners with evidence to support the use of an acute burn dressing that is superior in terms of pain relief for paediatric patients with acute thermal burn injuries. Optimising pain management for paediatric burn patients is more than just a compassionate need to reduce suffering – despite that being a sufficient motivator for health care professionals. Improving acute pain control for children with traumatic injuries such as a burn is critical, as suboptimal analgesia can prolong wound re-epithelialisation [4, 5]. Moreover, adverse and uncontrolled pain can have long-term emotional consequences [6, 7] and influence pain perception and processing later in life [8, 9].

Topical administration of cool running water (CRW) for 20 minutes within 3 hours of the burn occurring is the recommended gold standard first aid for burn injuries, in accordance with the Australian and New Zealand Burn Association [10-14]. Following first aid, guidelines recommend burn wounds to be covered with a sterile dressing to maintain a moist wound environment, minimise the risk of infection, and prevent air exposure – as this can be quite painful for patients with acute burns [15]. Characteristics of an ideal acute burn dressing include a transparent non-adherent design, easy application and removal, and protection from environmental exposure. Plasticised polyvinylchloride (PVC) film fulfils this criteria, and excluding the application to facial burns, is an inexpensive and practical dressing for acute burn injuries in the prehospital and Emergency Department (ED) setting. For this reason, PVC film has been used in the management of acute burns for over four decades. However, the preferred acute burn dressing varies between prehospital services in different states and countries.

Over the past decade, Burnaid® hydrogel dressings have gained widespread use in the prehospital setting for acute burn injuries – and are promoted as providing hydration to the burn wound and pain relief via a convection and evaporative cooling effect [16]. Burnaid® dressings comprise of a 3mm thick sterile polyester urethane foam pad impregnated with a propylene glycol gel, which contains more than 90% purified water. Despite its popularity amongst prehospital services, there is limited empirical evidence for the effectiveness

1  
2 of hydrogel burn dressings, and no studies have been conducted in a paediatric burn population. At present,  
3  
4 there is no robust empirical evidence to support the adoption of one particular acute burn dressing over the  
5  
6 others. With the continual development of expensive wound care products, it is important that we validate  
7  
8 their use and effectiveness within the targeted clinical population. This trial examined the effectiveness of  
9  
10 Burnaid® hydrogel dressings as an analgesic adjunct to first aid for the treatment of acute paediatric burns in  
11  
12 comparison to current standard practice – PVC film. While PVC film offers protection from the external  
13  
14 environment, Burnaid® dressings provide evaporative cooling and a significant reduction in sub-dermal  
15  
16 temperatures when air currents pass over the dressing [17]. This evaporative cooling effect, which is specific  
17  
18 to hydrogel dressings, was the expected benefit of Burnaid® in comparison to PVC film. This evaporative  
19  
20 cooling effect was also why Burnaid® dressings were hypothesised to provide superior pain relief compared  
21  
22 to the current standard acute burn dressing.  
23  
24

## 26 **2. Methods**

### 27 *2.1 Design and setting*

28  
29 We conducted a prospective, single-centre, superiority, randomised controlled trial (RCT) examining the  
30  
31 effectiveness of a hydrogel dressing as an analgesic adjunct to first aid for the treatment of acute paediatric  
32  
33 burn injuries, compared to current standard care. We used a two-arm parallel design with a 1:1 allocation  
34  
35 ratio. Participants were recruited between September 2017 – September 2018 from the ED and the Pegg  
36  
37 Leditschke Children's Burns Outpatient Department (OPD) at the Queensland Children's Hospital (QCH)  
38  
39 following initial presentation for their burn. The QCH serves as the major burns referral centre for  
40  
41 Queensland and Northern New South Wales, treating over 1200 paediatric patients with burn injuries per  
42  
43 annum.  
44  
45  
46

### 47 *2.2 Patient and public involvement*

48  
49 Patients and/or the public were not involved in the development of this research. However, relevant  
50  
51 stakeholders and knowledge users (i.e. prehospital staff, clinicians, and nurses) were involved in the initial  
52  
53 development of the trial, refinement of research questions, and identification of current knowledge gaps.  
54  
55  
56  
57  
58  
59  
60

### 2.3 Protocol and registration

This trial received ethics approval from The Queensland Children's Health Service Human Research Ethics Committee (approval number: HREC/16/QRCH/322) and The University of Queensland Ethics Committee (clearance number: 2017000979). Study methodology was documented in a published protocol [18] and registered with the Australian New Zealand Clinical Trials Registry (ID number: ACTRN12617001274369) on the 5<sup>th</sup> September 2017 prior to recruitment. This trial was completed as per the published protocol [18], which contains a more in-depth description of the trial's design and methods.

### 2.4 Participants

#### 2.4.1 Inclusion criteria

Inclusion criteria: children aged between 0 – 16 years with an acute thermal burn < 20% of the child's total body surface area (TBSA), presented to the ED or Burns OPD within 24 hours of sustaining the burn, received optimal first aid, and no definitive silver dressings or silver sulphadiazine cream applied prior to enrolment.

#### 2.4.2 Exclusion criteria

Exclusion criteria included: children with non-thermal burns or inhalation injuries, presented to the QCH more than 24-hours post-burn, inadequate first aid, prior treatment with silver wound products, non-English speaking, cognitive impairments, required ventilation or initial debridement under general anaesthetic, current involvement with Department of Communities, known sensitivity to hydrogels, and patients with comorbidities that could impair wound healing or exacerbate/alter pain (i.e. metabolic congenital disorders, spinal cord defects/injuries, insensate patients).

**[INSERT Figure 1. CONSORT Flow Diagram]**

### 2.5 Procedures

Participant enrolment and intervention allocation are described above in *Figure 1*. All participants (if age appropriate) and caregivers were given verbal and written information about the research, and provided signed consent to participate in the trial. After obtaining informed consent, participants were stratified by pain risk (1. High Pain or 2. Low Pain) according to factors that could influence pain in paediatric burn patients. Factors were based on findings from a retrospective review of data from the Queensland Paediatric

1  
2 Burns Registry (unpublished hospital quality review). Participants presenting to the ED or Burns OPD with  
3  
4 one or more of the following criteria were considered at high pain risk: unilateral or bilateral foot burns,  
5  
6 campfire/hot coal burns, circumferential burn injuries, and burns >5% TBSA. Following stratification,  
7  
8 patients were randomised to receive either (1) Burnaid® hydrogel dressing (Intervention) or (2) PVC film  
9  
10 (Control). A computerised random number sequence-generating program was used for participant  
11  
12 randomisation. Concealment of treatment allocation were performed via the use of sealed, opaque, identical,  
13  
14 consecutively numbered envelopes prepared in advance by an independent third-party.  
15  
16

17  
18 Due to the pragmatic nature of this trial, researchers could not be blinded to which randomised dressing  
19  
20 patients received. Researchers were required to be present when the acute burn dressings were applied and  
21  
22 removed to obtain pain scores and additional outcome measures from the child, caregiver, and medical staff.  
23  
24 Treating clinicians, nursing staff, patients, and caregivers were also not blinded to which treatment  
25  
26 participants received as dressings were visible on the patient's burn. Because these dressings are topical,  
27  
28 concealment during patient treatment in the ED was not possible. To include an element of blinding in the  
29  
30 trial, a specialist panel of burn surgeons and senior nurses performed a blinded review of 3D wound images  
31  
32 to determine rate of re-epithelialisation at each dressing change until > 95% burn re-epithelialisation  
33  
34 occurred.  
35  
36

37 **[INSERT Figure 2. Pain assessment timepoints during acute and follow up care]**  
38

39  
40 Pain was assessed in the ED (*Figure 2A*) at four timepoints relative to the child's acute treatment for their  
41  
42 burn: (T1) Pre-randomised dressing application, (T2) Post-randomised dressing application, (T3) Pre-  
43  
44 definitive dressing application, and (T4) Post-definitive dressing application. Peak pain during wound  
45  
46 cleaning and debridement was also collected from nursing staff using the FLACC, aiming to capture the  
47  
48 worst/maximal pain experienced during acute treatment. During subsequent dressing changes in the Burns  
49  
50 OPD (*Figure 2B*), pain was assessed at four time points relative to the child's follow up treatment: (T1) Pre-  
51  
52 definitive-dressing removal, (T2) Post-definitive dressing removal, (T3) Pre-definitive dressing application,  
53  
54 (T4) Post-definitive dressing application. Peak pain during wound cleaning was also documented during  
55  
56 dressing changes. Observational pain scores from ED nursing staff assessed post-application of the  
57  
58 randomised dressings (T2 in *Figure 2A*) was the primary outcome measure of the trial. Pain at T2 was  
59  
60

1  
2 assessed five minutes after the application of the randomised dressings for all participants – to give the  
3  
4 dressings a standard period of time on the wound before pain assessment.  
5

6  
7 Randomised dressings were left in place for 20-minutes. This time duration was chosen as the standardised  
8  
9 time for dressings to be applied in the ED for two reasons. First, this duration was predicted to be the time  
10  
11 taken from patient presentation to surgical assessment in the ED – prior to wound debridement and definitive  
12  
13 dressing application. This time duration was discussed with key stakeholders and relevant knowledge users  
14  
15 (such as ED consultants, surgical consultants, and nursing staff) prior to recruitment and data collection for  
16  
17 the trial. Second, 20-minutes has previously been used as the standardised time duration for the application  
18  
19 of Burnaid® dressings in a burn porcine model [17]. As little-to-no research has been conducted examining  
20  
21 acute burn dressings in a paediatric ED setting, and Burnaid® dressings do not provide a minimum duration  
22  
23 for dressing application, 20-minutes was used as a standardised duration to ensure consistency between  
24  
25 participants.  
26

27  
28  
29 Additional measures collected at each of the eight aforementioned timepoints during the child's acute and  
30  
31 follow up care included: a saliva sample (to measure biomarkers of stress), heart rate, and temperature. The  
32  
33 duration of each burn care procedure was timed in the ED and Burns OPD. Information regarding analgesic  
34  
35 medication administered to the patient prior to enrolment in the trial was obtained from Ambulance chart  
36  
37 records and referral notes. All medication administered to patients following presentation to the QCH was  
38  
39 recorded, in addition to all non-pharmacological interventions such as distraction techniques, rewards,  
40  
41 procedural preparation, and music/behavioural therapies.  
42

## 43 44 2.6 Interventions

### 45 46 2.6.1 Intervention – Burnaid® hydrogel dressing

47  
48 Burnaid® hydrogel dressing (Mundicare®, Sydney, Australia) served as the treatment intervention in this trial.  
49  
50 Burnaid® products previously contained *Melaleuca Alternifolia* (tea tree) for its broad-spectrum antimicrobial  
51  
52 properties, however inclusion of this active ingredient has since ceased and no tea tree containing Burnaid®  
53  
54 products were used in this investigation.  
55  
56  
57  
58  
59  
60



## 2.6.2 Control – Plasticised polyvinylchloride film

Plasticised PVC film (also known as plastic wrap, cling film, and Saran™ wrap) is a thin (< 25µm) food-wrap that has been used in the management of acute burn injuries for over four decades [19, 20].

## 2.7 Measurements

### 2.7.1 Primary outcome measure

Observational pain scores from ED nursing staff was the primary outcome measure of the trial, and was assessed using the Face, Legs, Activity, Cry and Consolability (FLACC) scale. The FLACC scale is a five-item composite tool measuring aspects of both pain and distress in children. The scale consists of five categories of behaviour, each of which are scored on a 0 to 2-point scale, giving a total score ranging from 0 to 10 [21]. The FLACC has been described in the literature as a reliable and well-validated pain assessment tool for postoperative pain in patients age between 0 – 7, and has shown correlations with child self-report pain measures [22, 23]. This pain scale was chosen to be the primary outcome measure for the trial based on the low median age range of patients presenting to the QCH with a burn. Whilst self-report pain measures are acknowledged to be the gold standard – a significant proportion of patients presenting to the ED for acute burn treatment are pre-verbal and thus unable to self-report their pain.

### 2.7.2 Additional Measures of Pain

#### 2.7.2.1 Child self-report (ages 4 – 8 years)

Child self-report pain scores were assessed using the Faces Pain Scale – Revised (FPS – R). The FPS – R is a linear self-report scale designed for pain assessment in children over the age of four [24, 25]. The item is composed of six-points (six-faces with differing expressions) with a lower anchor of *no pain* and an upper anchor of *very much pain*.

#### 2.7.2.2 Child self-report (ages 8+)

For patients over the age of eight, self-report pain was assessed using the Visual Analogue Scale for Pain (VAS). The VAS has been described in the literature as a reliable and well-validated pain assessment tool for use in older children [26, 27].

### 2.7.2.3 Parent (observational) report

Parent/caregiver observational pain scores were assessed using the Observer Visual Analogue Scale for Pain (VAS Observer) for pre-verbal paediatric patients and those under the age of four. The VAS Observer has been shown to be a reliable and valid observational pain scale for use in a non-verbal paediatric population, and for children who are unable to self-report their pain [28].

### 2.7.3 Secondary outcome measures

#### 2.7.3.1 Re-epithelialisation

Burns were considered re-epithelialised if  $\geq 95\%$  of the original wound area had re-epithelialised, and the patient no longer required definitive dressings. Wound re-epithelialisation was assessed using two methods. First, clinical judgement from the treating surgical consultant was determined at each dressing change. Second, a panel of paediatric burn specialists performed a blinded review of 3D images (3D LifeViz™ System; QuantifiCare, Valbonne, France) of patient's burn wounds taken at each dressing change.

#### 2.7.3.2 Stress

Stress was assessed in this trial using  $\alpha$ -amylase – a biochemical stress marker produced locally within salivary glands. Patients placed a SalivaBio Oral Swab™ (Salimetrics Europe Ltd., Newmarket, UK) under their tongue for 2 minutes for saliva collection. Salivary Alpha-Amylase Kinetic Enzyme Assay Kits (Item No. 1-1902, Salimetrics Inc) were used to quantify  $\alpha$ -amylase, as per the manufacturer's instructions. The trial protocol included assessments of levels of  $\alpha$ -amylase and cortisol as indicators of stress during burn wound treatment in the ED and subsequent dressing changes. Salivary  $\alpha$ -amylase (sAA) was selected over cortisol based on previous research conducted at the Pegg Leditschke Paediatric Burns OPD [29]. This research found sAA to be responsive to stress during wound care procedures, and also found an association between sAA and pain in children with thermal burns during dressing changes. Moreover, follow up appointments occur during a morning clinic which runs from 7.30am – 10am. Cortisol levels are known to peak within 30 – 45 minutes of waking up and then decrease due to diurnal variation. Due to the timing of sample collection, sAA was deemed to be a more appropriate measure of stress in this trial. Saliva samples were analysed from the following timepoints:

1. Pre- and post-application of the randomised dressing (i.e. Burnaid® or PVC film)

2. Following patient arrival in the Burns OPD for their first dressing change – prior to premedication and definitive dressing removal
3. Following patient arrival in the Burns OPD for their second dressing change – prior to premedication and definitive dressing removal

### 2.7.3.3. *Staff and caregiver perspectives on dressings*

Dressing satisfaction from clinical staff regarding ease of randomised dressing application, ease of removal, flexibility, and conformity were rated using a self-report 0 – 10 Numeric Rating Scale (NRS) for both Burnaid® dressings and PVC film from ED nursing staff. Parent/caregiver ratings on ease of dressing application, removal, comfort, and ease of movement were also assessed using a 0 – 10 NRS. It is acknowledged that ease of dressing measurements within the ED were confounded due to lack of blinding, and as a result of the variable nature, size, and anatomical location of the areas to be dressed.

### 2.7.3.4 *Demographic and clinical information*

Demographic and clinical details were obtained from parents/caregivers and medical records including age, sex, burn mechanism, area affected, estimated burn TBSA, and prehospital care (such as first aid and pharmacological interventions). Treating surgical staff first assessed burn TBSA in the ED following wound debridement using a modified version of the Lund and Browder chart [30]. Burn TBSA was also assessed at each change of dressing from the child's treating consultant until the burns were considered to be 95% re-epithelialised. Burn depth was assessed using two methods in the trial. First, clinical judgment from the treating surgical consultant was reported following initial patient presentation to the hospital, and at each follow up appointment in the Burns OPD for dressing changes. Second, burn depth was assessed using rapid imaging with Moor LDLS-BI™ Laser Doppler Imager (Moor Instruments Limited, Devon, United Kingdom). Laser Doppler Imaging (LDI) is a non-contact technique used in the assessment of burn injuries to measure skin blood perfusion at the surface of the burn wound [31]. LDI measures the extent of micro-vessel blood flow within the whole burn area, providing information on burn depth via microcirculation expressed as “perfusion units” (PU) [32, 33]. Participants had their burn wounds scanned using LDI on their first change of dressing (72 – 120 hours post-burn) in the Burns Outpatient Department to obtain mean and minimum PU. This time period for LDI is in accordance with the manufactures instructions, and has been established as acceptable time frame in recent studies [34, 35].

## 2.8 Statistical Analysis

In accordance with previous studies aiming to reduce pain in paediatric burn patients, we expected pain scores within each treatment group to have a normal distribution and a standard deviation (SD) of 2.4 [36]. Data were analysed on an intent-to-treat basis. Sample size was estimated at 29 experimental (intervention) participants and 29 control participants to detect a significant between-group difference of 1.8 in pain scores post-dressing application. With power equal to 0.8,  $\alpha$  set at 0.05, and up to a potential 20% loss to follow-up, the calculated target sample size was 72 participants. Between-group differences in primary and secondary outcomes were estimated using mixed models in Stata version 16 [37]. Random effects for patients accounted for the repeated measures, and restricted maximum likelihood method with Kenward-Rogers degrees of freedom was used. Each model included data at baseline (i.e. pre-dressing) and at one follow-up time, and assumed no population differences at baseline, a change from baseline in the control group and a different change from baseline in the intervention group. Adjusted mean differences (Intervention - Control) and 95% confidence intervals (CIs) are reported. The sAA data was log-transformed, and the adjusted ratio of geometric means (Intervention  $\div$  Control) are reported [38].

## 3. Results

### 3.1 Sample and demographic characteristics

Seventy-two paediatric burn patients were randomised and recruited into the trial. Four participants were lost to follow up and had no additional data collected past the initial point of treatment in the ED. Patient demographic details and baseline characteristics are presented in *Table 1*.

**Table 1.** Participant demographic and clinical variables

| Variable                       | Intervention<br>N = 37 | Control<br>N = 35 |
|--------------------------------|------------------------|-------------------|
| Patient age (years)            |                        |                   |
| 0 – 3                          | 20 (54%)               | 27 (77%)          |
| 4 – 7                          | 9 (24%)                | 5 (14%)           |
| 8 – 16                         | 8 (22%)                | 3 (9%)            |
| Indigenous status              |                        |                   |
| Not indigenous                 | 34 (92%)               | 33 (94%)          |
| Aboriginal                     | 2 (5%)                 | 2 (6%)            |
| Torres Strait Islander         | 1 (3%)                 | 0 (0%)            |
| Gender                         |                        |                   |
| Male                           | 22 (59%)               | 19 (54%)          |
| Mechanism of injury            |                        |                   |
| Scald                          | 26 (70%)               | 28 (80%)          |
| Contact                        | 8 (22%)                | 7 (20%)           |
| Flame                          | 2 (5%)                 | 0 (0%)            |
| Flash                          | 1 (3%)                 | 0 (0%)            |
| Burn source                    |                        |                   |
| Hot beverage                   | 10 (27%)               | 14 (40%)          |
| Water from kettle/saucepan/tap | 7 (19%)                | 10 (29%)          |
| Noodles                        | 7 (19%)                | 3 (9%)            |
| Food (other)                   | 1 (3%)                 | 1 (3%)            |
| Stove/oven/barbeque            | 4 (11%)                | 3 (9%)            |
| Lighter                        | 2 (5%)                 | 0 (0%)            |
| Hair straightener/curling iron | 1 (3%)                 | 2 (6%)            |
| Fireplace/sun heated metal     | 2 (5%)                 | 2 (6%)            |
| Hot oil/wax                    | 2 (5%)                 | 0 (0%)            |
| Aerosol can explosion          | 1 (3%)                 | 0 (0%)            |
| Burn TBSA percentage           | 2 (1 - 4)              | 2 (1 - 4)         |
| Burn depth                     |                        |                   |
| Superficial partial thickness  | 30 (81%)               | 24 (69%)          |
| Deep dermal partial thickness  | 7 (19%)                | 11 (31%)          |
| Burn wound perfusion           |                        |                   |
|                                | † N = 48               | † N = 43          |
| LDI Mean PU                    | 696 (293)              | 679 (276)         |
| LDI Minimum PU                 | 144 (143)              | 110 (104)         |

|    |                                       |          |          |
|----|---------------------------------------|----------|----------|
| 1  |                                       |          |          |
| 2  | Anatomical region affected            |          |          |
| 3  |                                       |          |          |
| 4  | Upper limb and/or hand                | 19 (51%) | 20 (57%) |
| 5  | Lower limb and/or foot                | 11 (30%) | 10 (29%) |
| 6  |                                       |          |          |
| 7  | Chest, abdomen, and/or back           | 12 (32%) | 13 (37%) |
| 8  | Head, face, and/or neck               | 8 (22%)  | 10 (29%) |
| 9  |                                       |          |          |
| 10 | Buttocks, perineum, and/or genitals   | 5 (14%)  | 2 (6%)   |
| 11 |                                       |          |          |
| 12 | Number of anatomical regions affected |          |          |
| 13 | 1                                     | 24 (65%) | 21 (60%) |
| 14 |                                       |          |          |
| 15 | 2                                     | 8 (22%)  | 9 (26%)  |
| 16 |                                       |          |          |
| 17 | 3                                     | 5 (14%)  | 4 (11%)  |
| 18 |                                       |          |          |
| 19 | 4                                     | 0 (0%)   | 1 (3%)   |
| 20 | Required medication in the ED         |          |          |
| 21 | Paracetamol                           | 32 (86%) | 33 (94%) |
| 22 |                                       |          |          |
| 23 | Ibuprofen                             | 26 (70%) | 28 (80%) |
| 24 |                                       |          |          |
| 25 | Oxycodone                             | 21 (57%) | 21 (60%) |
| 26 |                                       |          |          |
| 27 | Fentanyl                              | 28 (76%) | 27 (77%) |
| 28 |                                       |          |          |
| 29 | Nitrous                               | 4 (11%)  | 4 (11%)  |
| 30 |                                       |          |          |
| 31 | Ketamine                              | 1 (3%)   | 1 (3%)   |
| 32 |                                       |          |          |
| 33 | Methoxyflurane                        | 2 (5%)   | 1 (3%)   |
| 34 |                                       |          |          |
| 35 | Morphine                              | 1 (3%)   | 0 (0%)   |
| 36 |                                       |          |          |
| 37 | Midazolam                             | 1 (3%)   | 0 (0%)   |
| 38 |                                       |          |          |
| 39 | Polypharmacy                          |          |          |
| 40 |                                       |          |          |
| 41 | 0                                     | 1 (3%)   | 0 (0%)   |
| 42 |                                       |          |          |
| 43 | 1                                     | 4 (11%)  | 3 (9%)   |
| 44 |                                       |          |          |
| 45 | 2                                     | 4 (11%)  | 4 (11%)  |
| 46 |                                       |          |          |
| 47 | 3                                     | 14 (38%) | 12 (34%) |
| 48 |                                       |          |          |
| 49 | 4                                     | 10 (27%) | 12 (34%) |
| 50 |                                       |          |          |
| 51 | 5                                     | 2 (5%)   | 4 (11%)  |
| 52 |                                       |          |          |
| 53 | 6                                     | 2 (5%)   | 0 (0%)   |
| 54 |                                       |          |          |
| 55 | Distraction Techniques                |          |          |
| 56 |                                       |          |          |
| 57 | Nil                                   | 13 (35%) | 9 (26%)  |
| 58 |                                       |          |          |
| 59 | Lollies/food                          | 1 (3%)   | 4 (11%)  |
| 60 |                                       |          |          |
|    | Sleeping                              | 2 (5%)   | 1 (3%)   |
|    |                                       |          |          |
|    | Television/phone distraction          | 15 (41%) | 11 (31%) |
|    |                                       |          |          |
|    | Bubbles/toys                          | 5 (14%)  | 7 (20%)  |
|    |                                       |          |          |
|    | Music therapy/clown doctors           | 1 (3%)   | 2 (6%)   |
|    |                                       |          |          |
|    | Ditto™ distraction device             | 0 (0%)   | 1 (3%)   |

| Definitive dressings applied in ED          |                  |                |
|---------------------------------------------|------------------|----------------|
| Acticoat™ 3 + Mepitel™ + Hypafix®           | 13 (35%)         | 10 (29%)       |
| Acticoat™ 7 + Mepitel™ + Hypafix®           | 7 (19%)          | 8 (23%)        |
| Mepilex Ag™ + Hypafix®                      | 16 (43%)         | 16 (46%)       |
| Paraffin wax                                | 1 (3%)           | 1 (3%)         |
| Time (minutes) to ED presentation           | N = 36           | N = 34         |
|                                             | 90 (66 – 137)    | 79 (60 – 119)  |
| Time (minutes) spent in ED                  | 106.5 (66 – 151) | 113 (76 – 180) |
| Time (minutes) dressing was applied to burn | 34 (22-61)       | 35 (5-150)     |
| Documented first aid (20 minutes CRW)       | 36 (97%)         | 34 (97%)       |
| QAS applied Burnaid®                        | 11 (30%)         | 7 (20%)        |
| QAS applied PVC film                        | 8 (22%)          | 11 (31%)       |
| High pain risk stratum                      | 8 (22%)          | 9 (26%)        |

Data are presented as median (IQR) for continuous measures, and N (%) for categorical measures unless stated otherwise. † As a result of patients having multiple burns to different anatomical regions, LDI scans were taken of 91 burn wounds from 58 patients:  $n = 48$  burns for the intervention group and  $n = 43$  wounds for the control. N = number of participants; ED = emergency department; CRW = cold running water; QAS = Queensland ambulance service; TBSA = total body surface area; LDI = laser Doppler imaging; PU = perfusion units; PVC = plasticized polyvinylchloride.

No adverse events occurred in the intervention or control group, and no baseline population differences were identified. Throughout data collection, no children in the 4 – 8 age group reported having trouble self-reporting their pain to the investigator using the FPS – R. Data were collected for dressing changes four ( $n = 8$ ), five ( $n = 4$ ), six ( $n = 1$ ), seven ( $n = 1$ ), eight ( $n = 1$ ), nine ( $n = 1$ ) and ten ( $n = 1$ ) for patients requiring multiple dressing changes, but were not included in the analysis due to low numbers of participants in the trial requiring more than four dressings.

Successful LDI scans were completed for 58 out of the 72 participants during their first burn dressing change. The revised standard scale of 0 – 1000 PU was used to measure burn depth from LDI scans. In accordance with previous studies, 0 – 250 PU indicated full thickness injuries, 250 – 625 PU represented deep dermal partial thickness burns, and >625 PU corresponded to superficial partial thickness burns [39]. T-tests revealed no significant difference in LDI scores between the intervention or control group for mean perfusion,  $p = 0.79$ . In addition, no difference in minimum LDI scores were found between the intervention or control group,  $p = 0.20$ . Mean PUs for both groups were greater than or equal to 625 PU indicating

1  
2 superficial partial thickness burn injuries. These values support clinical judgement from the treating surgical  
3  
4 consultants for burn depth assessment (see *Table 1*.)  
5

### 6 7 *3.2 Primary outcome*

8  
9 Acute pain scores collected in the ED before and after the application of the randomised dressing (T1 and  
10  
11 T2), and before and after definitive dressing application (T3 and T4), are reported in *Table 2* for the two  
12  
13 groups. No significant between-group differences in pain scores (assessed using the FLACC scale from  
14  
15 nursing staff) were found between paediatric patients who received Burnaid® dressings and those who  
16  
17 received PVC film as an acute burn dressing in the ED following initial presentation to the QCH and CRW  
18  
19 first aid. No significant group differences in FLACC scores were found post-randomised dressing application  
20  
21 (Mean Difference: -0.1, 95% CI: -0.7 to 0.5,  $p = 0.72$ ), pre-definitive dressing application (Mean Difference:  
22  
23 -0.3, 95% CI: -1 to 0.5,  $p = 0.51$ ), or post-definitive dressing application (Mean Difference: 0, 95% CI: -0.8  
24  
25 to 0.9,  $p = 0.92$ ).  
26  
27  
28  
29  
30  
31  
32  
33  
34  
35  
36  
37  
38  
39  
40  
41  
42  
43  
44  
45  
46  
47  
48  
49  
50  
51  
52  
53  
54  
55  
56  
57  
58  
59  
60



**Table 2.** Acute pain scores in the ED

| Pain scale                   | Time point | N  | Intervention<br>Mean (SD) | N  | Control<br>Mean (SD) | Adjusted<br>Mean<br>Difference | 95% CI      | <i>p</i> value |
|------------------------------|------------|----|---------------------------|----|----------------------|--------------------------------|-------------|----------------|
| FLACC<br>(0 – 10 scale)      | T1         | 35 | 1.2 (2.1)                 | 23 | 0.7 (1.4)            | -                              | -           | -              |
|                              | T2         | 36 | 0.4 (1.0)                 | 35 | 0.4 (0.7)            | -0.1                           | -0.7 to 0.5 | 0.72           |
|                              | T3         | 36 | 0.4 (1.2)                 | 34 | 0.6 (1.6)            | -0.3                           | -1 to 0.5   | 0.51           |
|                              | T4         | 35 | 0.8 (1.7)                 | 33 | 0.7 (1.5)            | 0                              | -0.8 to 0.9 | 0.92           |
|                              | Peak Pain  | 36 | 3.4 (2.4)                 | 34 | 3.9 (2.8)            | 0.6                            | 1.7 to 0.5  | 0.29           |
| VAS<br>(0 – 100)             | T1         | 9  | 38 (29)                   | 2  | 20 (14)              | -                              | -           | -              |
|                              | T2         | 10 | 20 (22)                   | 4  | 28 (36)              | -14                            | -37 to 9    | 0.22           |
|                              | T3         | 11 | 16 (21)                   | 5  | 8 (18)               | 4                              | -18 to 26   | 0.74           |
|                              | T4         | 7  | 31 (25)                   | 4  | 25 (44)              | -1                             | -31 to 29   | 0.96           |
| FPS – R<br>(0 – 10)          | T1         | 9  | 3.3 (3.7)                 | 7  | 3.6 (2.6)            | -                              | -           | -              |
|                              | T2         | 10 | 2.8 (4.2)                 | 8  | 2.4 (3.0)            | 0.3                            | -1.7 to 2.2 | 0.78           |
|                              | T3         | 11 | 1.5 (3.3)                 | 11 | 1.3 (3.1)            | 0.6                            | -1.8 to 2.9 | 0.64           |
|                              | T4         | 10 | 2.9 (3.5)                 | 10 | 3.0 (4.1)            | 0.1                            | -3.1 to 3.3 | 0.96           |
| VAS<br>Observer<br>(0 – 100) | T1         | 34 | 32 (28)                   | 22 | 30 (21)              | -                              | -           | -              |
|                              | T2         | 34 | 22 (24)                   | 31 | 21 (19)              | 1                              | -8 to 11    | 0.78           |
|                              | T3         | 35 | 18 (20)                   | 34 | 18 (25)              | 0                              | -11 to 11   | 0.96           |
|                              | T4         | 33 | 24 (25)                   | 32 | 18 (26)              | 6                              | -7 to 18    | 0.36           |

\* Adjusted Mean Difference = Intervention Group – Control Group. FLACC = face, legs, activity, cry, consolability; VAS = visual analogue scale; FPS-R = faces pain scale revised; SD = standard deviation; CI = confidence interval; T1 = pre-randomised dressing application; T2 = post-randomised dressing application; T3 = pre-definitive dressing application; T4 = post-definitive dressing application.

### 3.2.1 Ancillary Pain Measures

#### 3.2.1.1. Parent and Caregiver Pain Scores (Observer VAS)

There were no significant differences in pain scores between the control and intervention group for observational pain ratings from parents and caregivers assessed using the VAS Observer in the ED. No significant between-group differences in VAS Observer pain scores were found between the intervention and control groups for post-randomised dressing application (Mean Difference: 1, 95% CI: -8 to 11,  $p = 0.78$ ), pre-definitive dressing application (Mean Difference: 0, 95% CI: -11 to 11,  $p = 0.96$ ), or post-definitive dressing application (Mean Difference: 6, 95% CI: -7 to 18,  $p = 0.36$ ) time points.

### 3.2.1.2 Child reported pain (FPS-R and VAS)

Child self-report pain scores measured using the FPS-R and VAS showed no significant between-group differences. Self-report FPS-R scores assessed post-dressing application (Mean Difference: 0.3, 95% CI: -1.7 to 2.2,  $p = 0.78$ ), pre-definitive application (Mean Difference: 0.6, 95% CI: -1.8 to 2.9,  $p = 0.64$ ), and post-definitive dressing application (Mean Difference: 0.1, 95% CI: -3.1 to 3.3,  $p = 0.96$ ) showed no significant group differences. As burn injuries often affect infants and children under the age of five, a small number of children recruited into the trial were aged over eight. The VAS for Pain is designed for children aged eight years and older. As a consequence of the median patient age, low numbers of participants were able to use this self-report pain scale and therefore limited statistical tests that could be performed. Median self-report VAS scores are presented in *Table 2* but should be interpreted with consideration of this sample size limitation.

## 3.3 Secondary outcomes

### 3.3.1 Physiological measures

No significant difference in mean pulse rate (Mean Difference: -3, 95% CI: -11 to 5,  $p = 0.41$ ) or temperature (Mean Difference: 0.6, 95% CI: -0.13 to 0.24,  $p = 0.53$ ) was detected between intervention and control groups following the application of the randomised dressings in the ED (see *Table 3*).

**Table 3.** Physiological measures in the ED

| Measure                     | Time point | N  | Intervention<br>Mean (SD) | N  | Control<br>Mean (SD) | Adjusted Mean<br>Difference | 95% CI        | <i>p</i> value |
|-----------------------------|------------|----|---------------------------|----|----------------------|-----------------------------|---------------|----------------|
| Pulse<br>(Beats/minute)     | T1         | 34 | 111 (27)                  | 24 | 112 (20)             | -                           | -             | -              |
|                             | T2         | 34 | 104 (26)                  | 32 | 109 (21)             | -3                          | -11 to 5      | 0.41           |
|                             | T3         | 33 | 105 (26)                  | 32 | 113 (21)             | -8                          | -16 to 1      | 0.07           |
|                             | T4         | 29 | 109 (25)                  | 31 | 113 (24)             | -3                          | -12 to 6      | 0.52           |
| Temperature<br>(° Celsius)  | T1         | 35 | 36.34                     | 25 | 36.42                | -                           | -             | -              |
|                             | T2         | 36 | 36.42                     | 33 | 36.36                | 0.6                         | -0.13 to 0.24 | 0.53           |
|                             | T3         | 36 | 36.43                     | 33 | 36.33                | 0.12                        | -0.12 to 0.37 | 0.33           |
|                             | T4         | 34 | 36.44                     | 33 | 36.32                | 0.14                        | -0.14 to 0.40 | 0.29           |
| Alpha-amylase<br>(units/mL) |            |    | † Mean (×/SD)             |    | † Mean (×/SD)        | † Ratio of Means            | 95% CI        |                |
|                             | T1         | 19 | 48 (×/2)                  | 8  | 46 (×/3)             | -                           | -             | -              |
|                             | T2         | 26 | 54 (×/3)                  | 20 | 37 (×/2)             | 1.53                        | 0.93 to 2.53  | 0.10           |

SD = standard deviation; CI = confidence interval; mL = millilitre; T1 = pre-randomised dressing application; T2 = post-randomised dressing application; T3 = pre-definitive dressing application; T4 = post-definitive dressing application. \* Adjusted Mean Difference = Intervention Group – Control Group. † Alpha-amylase data reported as geometric mean, geometric standard deviation, and ratio of geometric means.

### 3.3.2 Re-epithelialisation

Median (IQR) time to re-epithelialisation for the intervention group was 9 days (6.25 – 10.75) and 9 days (7.5 – 14) for the control group. Clinical assessment from treating surgeons showed no significant between-group differences in time to 95% re-epithelialisation, with a median difference (95% CI) equal to -1 (-3 to 1),  $p = 0.26$ . With regards to the blinded assessment of burn wound images, exact agreement between the treating surgical consultants and blinded review panel was used to examine agreement between health professionals measuring time to re-epithelialisation [40]. Agreement on evaluation of re-epithelialisation was found to be good (69% agreement) between the three expert reviewers and the treating surgeons (see *Appendix A* for additional agreement data).

### 3.3.3 Biochemical stress markers

No significant difference in sAA was found between the intervention and control group following the application of the randomised dressing during acute care in the ED (see *Table 3*). Children who received

1  
2 Burnaid® dressings did not show a reduction in the biochemical stress marker in comparison to paediatric  
3  
4 patients who received PVC film (Geometric Mean Ratio: 1.53, 95% CI = 0.93 to 2.53,  $p = 0.10$ ). Levels of  
5  
6 sAA collected in the waiting room during dressing changes one (Geometric Mean Ratio: 1, 95% CI = 0.65 –  
7  
8 1.56,  $p = 0.97$ ) and two (Geometric Mean Ratio: 1.14, 95% CI = 0.48 – 2.71,  $p = 0.75$ ) showed no significant  
9  
10 differences between children who received Burnaid® dressings in the ED and those who received PVC film  
11  
12 (see *Appendix B*).  
13  
14

#### 15 3.3.4 Pain at first, second, and third dressing changes 16 17

18 Pain scores assessed in the Burns Outpatient Department during follow up dressing changes one to three are  
19  
20 reported in *Appendix C* for the two treatment groups. No statistical differences in observational or child self-  
21  
22 report follow up pain scores were found between children who received Burnaid® dressings and those who  
23  
24 received PVC film during acute care. Temperature and pulse rate assessed during follow up dressing changes  
25  
26 (as physiological indicators of pain) also showed no significant group differences over dressing changes one  
27  
28 to three (see *Appendix B* for physiological data).  
29  
30

#### 31 3.3.5 Staff and caregiver perspectives on dressings 32 33

34 Dressing satisfaction from clinical staff, in addition to parents and caregivers, assessed in the ED during  
35  
36 acute care is presented in *Appendix D*. No significant differences in ease of dressing application, removal,  
37  
38 flexibility, or conformity were identified between the two groups from ED nursing staff. Parents are  
39  
40 caregivers reported higher satisfaction scores for ease of dressing application for children who received  
41  
42 Burnaid dressings, in comparison to those who received PVC film ( $p = 0.013$ ). Parent/caregiver satisfaction  
43  
44 scores were also higher for ease of dressing removal within the Burnaid arm, in comparison to the control  
45  
46 arm ( $p = 0.045$ ). Furthermore, parents and caregivers reported higher satisfaction scores for ease of  
47  
48 movement for children who received Burnaid, in comparison to paediatric patients who received PVC film in  
49  
50 the ED ( $p = 0.047$ ). Last, no significant differences in perceived patient comfort were identified between the  
51  
52 two groups from parents and caregivers using the 0 – 10 NRS.  
53  
54  
55  
56  
57  
58  
59  
60

#### 4. Discussion

There has been an emergence of research demonstrating the importance of acute pain control in traumatic injuries, emphasising the association between untreated pain and maladaptive outcomes such as: prolonged wound healing [4, 5], long-term emotional disorders [6, 7], and chronic pain conditions [8, 9]. Pain is a chief complaint for patients with burn injuries in the acute setting [41, 42]. Therefore, prehospital and acute care providers have a crucial role in recognising and reducing the burden of pain for these patients. Reducing acute pain is of particular importance for paediatric burn patients who often have to undergo numerous painful and distressing medical procedures during their care. The better pain and distress are managed during a child's first visit to the ED for burn wound treatment— the lower the child's chances are of developing anticipatory anxiety and avoidance behaviours for future medical procedures [43]. Effective non-pharmacological interventions for the management of acute burn pain are needed to supplement pharmacological methods of pain reduction in paediatric patients [36, 44]. We were pleasantly reassured to find most burn patients presenting to our ED had mild to no pain. Because of this, examining the effectiveness of acute burn dressings on reducing acute pain score was restricted – and results from this prospective RCT should be interpreted with the acknowledgement of this limitation. At present, there are no high level trials supporting the use of Burnaid® hydrogel dressings for acute burn management. The aim of this trial was to fill this gap in the literature, and examine the effectiveness of Burnaid® dressings on reducing acute pain scores in children with thermal burns. To the best of our knowledge, this is the first prospective RCT conducted in a paediatric burn population examining the analgesic properties of a hydrogel burn dressing in an ED setting.

Results from this prospective RCT should be interpreted with consideration of several limitations. First, very few participants had moderate to severe pain scores following their initial presentation to the QCH prior to recruitment into the trial - see *Appendix E* for complete pain score frequencies. More than 60% of paediatric burn patients received observational pain scores of zero (out of ten using the FLACC pain scale) from ED nursing staff. Moreover, an additional 19% of children received pain ratings equal to one (using the ten-point scale) following initial presentation to the ED. A significant effect of the intervention on reducing acute burn pain might not have been identified in this trial because pain scores were so low following patient's first presentation to hospital for their burn. Second, prehospital and referral services in Queensland acted to

1 provide comprehensive pharmacotherapies for pain management to paediatric patients with thermal burns  
2 during transportation to the QCH. So much so that pain scores might have been too low to observe a  
3 significant reduction following application of the intervention or control. A large proportion (78%) of patients  
4 enrolled in the trial received three or more medication classes during their acute burn care – the most common  
5 combination being paracetamol, ibuprofen, fentanyl for both groups (see *Table 1*).  
6  
7  
8  
9  
10  
11

12 The third limitation also relates to prehospital care, and includes the use of different acute burn dressings  
13 during patient transport to hospital, prior to randomisation and enrolment in the trial. As this was a pragmatic  
14 trial aiming to simulate real-world clinical scenarios within the ED, the application of prehospital acute burn  
15 dressings was not an exclusion criterion for participation. However, this meant that some participants  
16 received PVC film or Burnaid® prior to presenting to the QCH, which may have had confounding effects.  
17  
18  
19  
20  
21  
22  
23 Furthermore, sixteen participants ( $n = 4$  intervention and  $n = 12$  control) did not keep their randomised  
24 dressings on for the required 20-minute duration. Two main factors challenged dressing adherence during  
25 acute data collection in the ED – excessive wound exudate beneath the PVC film causing the dressings to  
26 slip off participant's burns, and a number of paediatric patients pulling at and removing their own dressings.  
27  
28  
29  
30  
31  
32  
33 Fidelity in these instances was compromised, and is a limitation of the current trial. Fourth, where paediatric  
34 burn patients received their first aid cooling (i.e. on-scene with paramedics, at home in the shower, or within  
35 the ED) was not delineated in the dataset – and this is acknowledged as a significant limitation. In addition,  
36  
37  
38  
39  
40  
41  
42 whilst all administered analgesia was documented for participants, where this analgesia was administered  
43 was also not delineated in the dataset. This is further acknowledged as a significant research limitation.  
44

45 The last limitation relates to potential moderating effects. Non-pharmacological interventions such as  
46 distraction are commonplace during paediatric medical procedures. Almost 70% of all participants received  
47 additional distraction techniques during their acute burn treatment in the ED such as video distraction using  
48 mobile phones and television, clown doctors, music therapists, bubbles, toys, and lollies (see *Table 1*). These  
49 non-pharmacological interventions were also left in place to simulate a real-world pragmatic trial, however  
50  
51  
52  
53  
54  
55  
56  
57  
58  
59  
60 could have moderated the effect of the intervention. An effect of the intervention on reducing acute pain  
scores might not have been detected due to the low pain scored at initial presentation, analgesia on-board at  
the time of recruitment, or other confounding factors such as the application of prehospital burn dressings  
prior to enrolment in the trial. It is therefore recommended that this research be replicated in the prehospital

1 setting – where acute pain scores are anticipated to be higher and the application of prehospital burn dressings  
2 and analgesia can be better controlled.  
3  
4  
5

## 6 7 **5. Conclusion** 8 9

10 It was predicted that Burnaid® dressings would provide superior analgesia for paediatric burn patients when  
11 applied as an adjunct to CRW first aid, in comparison to PVC film (current standard practice). However, the  
12 effect of the intervention on reducing acute pain scores was not supported in this investigation and we were  
13 unable to show a clinically relevant treatment effect caused by the intervention – Burnaid® hydrogel  
14 dressings. Results from this RCT found no significant between-group differences in observational pain  
15 scores assessed using the FLACC pain scale from ED nursing staff – the primary outcome of the trial.  
16 Moreover, no significant group-differences in parent/caregiver pain scores or child self-report pain scores  
17 were identified during acute care in the ED or follow up wound care in the Burns OPD. The effect of the  
18 intervention on additional outcomes including, time to re-epithelialisation, stress, temperature, heart rate, and  
19 need for analgesic medication was also not supported. Ease of dressing application and removal, in addition  
20 to ease of patient movement whilst dressings were applied, were higher for the Burnaid® group in accordance  
21 with parent and caregiver ratings. Dressing satisfaction measures from clinical staff within the ED found no  
22 significant differences between patients who received Burnaid® and those who received PVC film.  
23 Moreover, no difference in perceived comfort ratings from parents and caregivers were identified between  
24 the two groups.  
25  
26  
27  
28  
29  
30  
31  
32  
33  
34  
35  
36  
37  
38  
39  
40  
41  
42

43 As aforementioned, results from this prospective trial should be interpreted with consideration of several  
44 limitations including low pain scores following initial patient presentation, analgesia on-board at the time of  
45 recruitment, and pragmatic issues with dressing compliance. Additional research is still required to examine  
46 the effectiveness of different acute burn dressings as analgesic adjuncts to running water first aid. Research  
47 investigating adjunctive methods of pain control for children with burns holds great translational value. It  
48 was predicted that an acute burn dressing with additional cooling and evaporative properties would provide  
49 superior pain relief for children with thermal burns, in comparison to PVC film. This was not supported, and  
50 Burnaid® dressings do not appear to provide superior pain relief in comparison to PVC film when applied as  
51 an acute burn dressing following first aid and initial presentation to the ED.  
52  
53  
54  
55  
56  
57  
58  
59  
60

1  
2  
3  
4  
5  
6  
7  
8  
9  
10  
11  
12  
13  
14  
15  
16  
17  
18  
19  
20  
21  
22  
23  
24  
25  
26  
27  
28  
29  
30  
31  
32  
33  
34  
35  
36  
37  
38  
39  
40  
41  
42  
43  
44  
45  
46  
47  
48  
49  
50  
51  
52  
53  
54  
55  
56  
57  
58  
59  
60

## **Declarations**

### *Funding*

This work was supported by a research grant given to The University of Queensland by Mundipharma (Grant Number: 364010399) and an Australian Government Research Training Scholarship awarded to the primary investigator. Mundipharma had no role in the development of the trial, data collection, data analysis, or interpretation of results.

### *Conflicts of Interests*

All authors who contributed to this original research manuscript declare no conflicts of interests. All authors declare no financial or other interests in the product (Burnaid®) or distributor of the product (Mundipharma). All authors declare no past or existing relationships with the manufacturer or distributor of the product. Moreover, all authors declare no additional associations with the product manufacturer or distributor including consultancies, stock ownership, or other equity interests or patent-licensing arrangements.

### *Author Statement*

RMK and BRG conceived the research, designed the trial, and obtained research funding. MDH undertook participant recruitment, acute and follow up data collection, data management, and interpretation of results. MDC provided statistical support and conducted the formal analyses. MDH wrote the draft manuscript, and all authors provided critical review of the article and approved the final manuscript. MDH takes responsibility for the paper as a whole.

### *Acknowledgments*

We want to thank all the children and families for their time and participation in our research. We also wish to acknowledge and give thanks to the Burns, Surgical, and ED staff at the Queensland Children's Hospital for their support in the development and implementation of this research.

### *Data Sharing*

Additional data available upon request.

### *Word Count*

5398



## References

1. Scott LE, Crilly J, Chaboyer W, et al. Paediatric pain assessment and management in the emergency setting: The impact of a paediatric pain bundle. *Int Emerg Nurs*. 2013;21(3):173-19.
2. Summer GJ, Puntillo KA, Miaskowski C, et al. Burn injury pain: The continuing challenge. *J Pain*. 2007;8(7):533-48.
3. Morgan M, Deuis JR, Frøsig-Jørgensen M, et al. Burn pain: A systematic and critical review of epidemiology, pathophysiology, and treatment. *Pain Med*. 2018;19(4):708-34.
4. Brown NJ, Kimble RM, Rodger S, et al. Play and heal: Randomised controlled trial of Ditto™ intervention efficacy on improving re-epithelialization in pediatric burns. *Burns*. 2013;40(2):204-13.
5. Brown NJ, Kimble RM, Gramotnev G, et al. Predictors of re-epithelialization in pediatric burn. *Burns*. 2013.
6. De Young AC, Kenardy JA, Cobham VE, et al. Prevalence, comorbidity and course of trauma reactions in young burn-injured children. *J Child Psychol Psychiatry*. 2012;53(1):56-63.
7. Norman SB, Stein MB, Dimsdale JE, et al. Pain in the aftermath of trauma is a risk factor for post-traumatic stress disorder. *Psychol Med*. 2008;38(4):533-42.
8. Dauber A, Osgood PF, Breslau AJ, et al. Chronic Persistent Pain After Severe Burns: A Survey of 358 Burn Survivors. *Pain Med*. 2002;3(1):6-17.
9. Wollgarten-Hadamek I, Hohmeister J, Zohsel K, et al. Do school-aged children with burn injuries during infancy show stress-induced activation of pain inhibitory mechanisms? *Eur J Pain*. 2011;15(4):423.e1-e10.
10. Cuttle L, Kempf M, Liu PY, et al. The optimal duration and delay of first aid treatment for deep partial thickness burn injuries. *Burns*. 2010;36(5):673-9.
11. Bartlett N, Yuan J, Holland AJ, et al. Optimal duration of cooling for an acute scald contact burn injury in a porcine model. *J Burn Care Res*. 2008;29(5):828-34.
12. The Australian and New Zealand Burn Association. Emergency management of severe burns. 13 ed: Australian and New Zealand Burn Association; 2009.
13. Cuttle L, Kempf M, Kravchuk O, et al. The optimal temperature of first aid treatment for partial thickness burn injuries. *Wound Repair Regen*. 2008;16(5):626-34.
14. Griffin BR, Frear CC, Babl F, et al. Cool Running Water First Aid Decreases Skin Grafting Requirements in Pediatric Burns: A Cohort Study of Two Thousand Four Hundred Ninety-five Children. *Ann Emerg Med*. 2019.
15. Allison K, Porter K. Consensus on the pre-hospital approach to burns patient management. *Injury*. 2004;35(8):734-8.
16. Fein M, Quinn J, Watt K, et al. Prehospital paediatric burn care: New priorities in paramedic reporting. *Emerg Med Australas*. 2014;26(6):609-15.
17. Cuttle L, Kempf M, Kravchuk O, et al. The efficacy of Aloe vera, tea tree oil and saliva as first aid treatment for partial thickness burn injuries. *Burns*. 2008;34(8):1176-82.

- 1  
2 18. Holbert MD, Griffin BR, McPhail SM, et al. Effectiveness of a hydrogel dressing as an analgesic  
3 adjunct to first aid for the treatment of acute paediatric thermal burn injuries: study protocol for a randomised  
4 controlled trial. *Trials*. 2019;20(1):13.
- 5  
6 19. Milner RH, Hudson SJ, Reid CA. Plasticized polyvinyl chloride film as a primary burns dressing: a  
7 microbiological study. *Burns*. 1988;14(1):62-5.
- 8  
9 20. Lendrum J, Bowen-Jones E. A new dressing for burns: Enclosure in a plasticized polyvinyl chloride  
10 sheet. *Burns*. 1976;2(2):86-9.
- 11  
12 21. Merkel S, Voepel-Lewis T, Malviya S. Pain assessment in infants and young children: The FLACC  
13 scale: A behavioral tool to measure pain in young children. *Am J Nurs*. 2002;102(10):55-58.
- 14  
15 22. Willis MHW. FLACC behavioural pain assessment scale: A comparison with the child's self-report.  
16 *Pediatr Nurs*. 2003;29(3):195-8.
- 17  
18 23. Gomez R, Barrowman N, Elia S, et al. Reliability of the flacc scale for evaluating pain in toddlers.  
19 *Irish J Med Sci*. 2012;181(11):456-456.
- 20  
21 24. von Baeyer CL. Children's self-report of pain intensity: what we know, where we are headed. Pain  
22 research & management. 2009;14(1):39-45.
- 23  
24 25. Hicks CL, von Baeyer CL, Spafford PA, et al. The Faces Pain Scale – Revised: Toward a common  
25 metric in pediatric pain measurement. *Pain*. 2001;93(2):173-83.
- 26  
27 26. Bailey B, Gravel J, Daoust R. Reliability of the visual analog scale in children with acute pain in the  
27 emergency department. *Pain*. 2012;153(4):839-42.
- 28  
29 27. Stinson NJ, Kavanagh NT, Yamada NJ, et al. Systematic review of the psychometric properties,  
30 interpretability and feasibility of self-report pain intensity measures for use in clinical trials in children and  
31 adolescents. *Pain*. 2006;125(12):143-57.
- 32  
33 28. Taddio A, O'brien L, Ipp M, et al. Reliability and validity of observer ratings of pain using the visual  
34 analog scale (VAS) in infants undergoing immunization injections. *Pain*. 2009;147(123):141-6.
- 35  
36 29. Brown NJ, Kimble RM, Rodger S, et al. Biological markers of stress in pediatric acute burn injury.  
37 *Burns*. 2014;40(5):887-95.
- 38  
39 30. Dibildox M, Jeschke MG, Herndon DN. Burn Injury, Rule of Nines. In: Vincent J-L, Hall JB,  
40 editors. *Encyclopedia of Intensive Care Medicine*. Berlin, Heidelberg: Springer Berlin Heidelberg; 2012.  
41 417-9.
- 42  
43 31. Wang X-Q, Mill J, Kravchuk O, et al. Ultrasound assessed thickness of burn scars in association  
44 with laser Doppler imaging determined depth of burns in paediatric patients. *Burns*. 2010;36(8):1254-62.
- 45  
46 32. Mill J, Cuttle L, Harkin DG, et al. Laser Doppler imaging in a paediatric burns population. *Burns*.  
47 2009;35(6):824-31.
- 48  
49 33. Gill P. The critical evaluation of laser Doppler imaging in determining burn depth. *Int J Burns*  
50 *Trauma*. 2013;3(2):72-7.
- 51  
52 34. Štětinský J, Klosová H, Kolářová H, et al. The time factor in the LDI (Laser Doppler Imaging)  
53 diagnosis of burns. *Lasers Surg Med*. 2015;47(2):196-202.
- 54  
55  
56  
57  
58  
59  
60

- 1  
2 35. Wearn C, Lee KC, Hardwicke J, et al. Prospective comparative evaluation study of Laser Doppler  
3 Imaging and thermal imaging in the assessment of burn depth. *Burns*. 2018;44(1):124-33.  
4  
5 36. Miller K, Rodger S, Kipping B, et al. A novel technology approach to pain management in children  
6 with burns: A prospective randomized controlled trial. *Burns*. 2011;37(3):395.  
7  
8 37. StataCorp. Stata Statistical Software: Release 16. College Station TSL.  
9  
10 38. Limpert E, Stahel WA. Problems with Using the Normal Distribution - and Ways to Improve Quality  
11 and Efficiency of Data Analysis. *PLoS One*. 2011.  
12  
13 39. Chester SJ, Tyack Z, De Young A, et al. Efficacy of hypnosis on pain, wound-healing, anxiety, and  
14 stress in children with acute burn injuries: A randomised controlled trial. *Pain*. 2018;159(9):1790.  
15  
16 40. de Vet HCW, Terwee CB, Knol DL, et al. When to use agreement versus reliability measures. *J Clin*  
17 *Epidemiol*. 2006;59(10):1033-9.  
18  
19 41. Yuxiang L, Lingjun Z, Lu T, et al. Burn patients' experience of pain management: A qualitative  
20 study. *Burns*. 2012;38(2):180-6.  
21  
22 42. Nedelec JB, Carrougher JG. Pain and Pruritus Postburn Injury. *J Burn Care Res*. 2017;38(3):142-5.  
23  
24 43. Michalska JK, Feldman SJ, Abend LR, et al. Anticipatory Effects on Perceived Pain: Associations  
25 With Development and Anxiety. *Psychosom Med*. 2018;80(9):853-60.  
26  
27 44. Miller K, Rodger S, Bucolo S, et al. Multi-modal distraction. Using technology to combat pain in  
28 young children with burn injuries. *Burns*. 2010;36(5):647-58.  
29  
30  
31  
32  
33  
34  
35  
36  
37  
38  
39  
40  
41  
42  
43  
44  
45  
46  
47  
48  
49  
50  
51  
52  
53  
54  
55  
56  
57  
58  
59  
60

1  
2  
3  
4  
5  
6  
7  
8  
9  
10  
11  
12  
13  
14  
15  
16  
17  
18  
19  
20  
21  
22  
23  
24  
25  
26  
27  
28  
29  
30  
31  
32  
33  
34  
35  
36  
37  
38  
39  
40  
41  
42  
43  
44  
45  
46  
47  
48  
49  
50  
51  
52  
53  
54  
55  
56  
57  
58  
59  
60

**Figure Legend**

**Figure 1.** Consort flow diagram

**Figure 2.** Pain assessment timepoints during acute and follow up care

For peer review only

**Figure 1. Consort Flow Diagram**



1 *Figure 2A*



19 *Figure 2B*



**Appendix A.** Exact agreement between clinicians assessing time to re-epithelialization: Treating surgical consultant versus blinded expert panel

| Clinicians                | Agreement between Clinicians |
|---------------------------|------------------------------|
| Consultant and Reviewer 1 | 64%                          |
| Consultant and Reviewer 2 | 64%                          |
| Consultant and Reviewer 3 | 69%                          |
| Reviewer 1 and Reviewer 2 | 71%                          |
| Reviewer 1 and Reviewer 3 | 71%                          |
| Reviewer 2 and Reviewer 3 | 75%                          |

## Appendix B. Physiological measures at follow up dressing changes

| Measure                              | Time point                      | Intervention<br>Mean (SD)       | Control<br>Mean (SD) | Adjusted Mean<br>Difference (95% CI) | <i>p</i> value         |
|--------------------------------------|---------------------------------|---------------------------------|----------------------|--------------------------------------|------------------------|
| Pulse rate<br>(beats/minute)         | 1 <sup>st</sup> Dressing Change |                                 |                      |                                      |                        |
|                                      | T1                              | 104.1 (21.7)                    | 109.9 (19.0)         | -6 (-17 to 5)                        | 0.29                   |
|                                      | T2                              | 100.4 (23.6)                    | 104.9 (17.4)         | -4 (-17 to 8)                        | 0.47                   |
|                                      | T3                              | 98.3 (25.8)                     | 104.9 (15.3)         | -7 (-20 to 7)                        | 0.33                   |
|                                      | T4                              | 99.3 (24.1)                     | 109.6 (19.68)        | -10 (-24 – 3)                        | 0.13                   |
|                                      | 2 <sup>nd</sup> Dressing Change |                                 |                      |                                      |                        |
|                                      | T1                              | 104.2 (21.4)                    | 119.1 (22.7)         | -15 (-30 to 0)                       | 0.05                   |
|                                      | T2                              | 100.9 (20.9)                    | 109.9 (23.0)         | -9 (-25 to 7)                        | 0.25                   |
|                                      | T3                              | 95.7 (20.5)                     | 104.0 (20.6)         | -8 (-29 to 12)                       | 0.41                   |
|                                      | T4                              | 95.7 (21.5)                     | 104.3 (19.9)         | -9 (-33 to 16)                       | 0.45                   |
|                                      | 3 <sup>rd</sup> Dressing Change |                                 |                      |                                      |                        |
|                                      | T1                              | 108 (12.2)                      | 111.3 (27.8)         | -3 (-33 to 16)                       | 0.81                   |
|                                      | T2                              | 98.4 (19.9)                     | 103.9 (18.8)         | -6 (-33 to 16)                       | 0.60                   |
|                                      | T3                              | 95.3 (24.2)                     | 94.8 (19.0)          | 1 (-33 to 16)                        | 0.97                   |
|                                      | T4                              | 96.3 (31.1)                     | 102.0 (28.3)         | -9 (-33 to 16)                       | 0.81                   |
|                                      | Temperature<br>(° Celsius)      | 1 <sup>st</sup> Dressing Change |                      |                                      |                        |
| T1                                   |                                 | 36.1 (0.4)                      | 36.0 (0.4)           | 0.05 (-0.17 to 0.26)                 | 0.66                   |
| T2                                   |                                 | 36.3 (0.6)                      | 36.2 (0.5)           | 0.05 (-0.23 to 0.33)                 | 0.71                   |
| T3                                   |                                 | 36.2 (0.4)                      | 36.2 (0.5)           | -0.05 (-0.29 to 0.19)                | 0.66                   |
| T4                                   |                                 | 36.2 (0.4)                      | 36.3 (0.5)           | -0.03 (-0.29 to 0.22)                | 0.81                   |
| 2 <sup>nd</sup> Dressing Change      |                                 |                                 |                      |                                      |                        |
| T1                                   |                                 | 35.9 (0.4)                      | 35.9 (0.4)           | 0.02 (-0.21 to 0.25)                 | 0.85                   |
| T2                                   |                                 | 36.2 (0.4)                      | 36.3 (0.5)           | -0.08 (-0.35 to 0.25)                | 0.57                   |
| T3                                   |                                 | 36.3 (0.4)                      | 36.3 (0.4)           | -0.02 (-0.37 to 0.25)                | 0.9                    |
| T4                                   |                                 | 36.2 (0.4)                      | 36.3 (0.3)           | -0.16 (-0.43 to 0.25)                | 0.23                   |
| 3 <sup>rd</sup> Dressing Change      |                                 |                                 |                      |                                      |                        |
| T1                                   |                                 | 36.2 (0.9)                      | 36.1 (0.4)           | 0.19 (-0.44 to 0.83)                 | 0.53                   |
| T2                                   |                                 | 36.6 (0.6)                      | 36.4 (0.3)           | 0.18 (-0.27 to 0.63)                 | 0.4                    |
| T3                                   |                                 | 36.8 (0.4)                      | 36.2 (0.3)           | 0.52 (-0.02 to 1.06)                 | 0.06                   |
| T4                                   |                                 | 36.9 (0.5)                      | 36.4 (0.2)           | 0.5 (-0.02 to 1.02)                  | 0.06                   |
| Salivary $\alpha$ -amylase<br>(U/mL) |                                 | 1 <sup>st</sup> Dressing Change |                      | † Mean ( $\times$ /SD)               | † Mean ( $\times$ /SD) |
|                                      | T1                              | 39 (24 – 70)                    | 43 (23 – 65)         | 1.00 (0.65 to 1.56)                  | 0.97                   |
|                                      | 2 <sup>nd</sup> Dressing Change |                                 |                      |                                      |                        |
| T1                                   | 43 (17 – 106)                   | 28 (14 – 77)                    | 1.14 (0.48 to 2.71)  | 0.75                                 |                        |



1  
2  
3 SD = standard deviation; CI = confidence interval. U/mL = units per milliliter; T1 = timepoint 1; T2 = timepoint 2; T3 =  
4 timepoint 3; T4 = timepoint 4. \* Adjusted Mean Difference = Intervention Group – Control Group.  
5  
6  
7  
8  
9  
10  
11  
12  
13  
14  
15  
16  
17  
18  
19  
20  
21  
22  
23  
24  
25  
26  
27  
28  
29  
30  
31  
32  
33  
34  
35  
36  
37  
38  
39  
40  
41  
42  
43  
44  
45  
46  
47  
48  
49  
50  
51  
52  
53  
54  
55  
56  
57  
58  
59  
60

For peer review only

### Appendix C. Pain at dressing changes one, two, and three

| Pain Assessment Timepoint             | N (Intervention) | Intervention<br>Mean (SD) | N (Control) | Control<br>Mean (SD) | Adjusted Mean<br>Difference (95% CI) | <i>p</i> value |
|---------------------------------------|------------------|---------------------------|-------------|----------------------|--------------------------------------|----------------|
| <b>Nurse: FLACC (0 – 10)</b>          |                  |                           |             |                      |                                      |                |
| 1 <sup>st</sup> Dressing Change       |                  |                           |             |                      |                                      |                |
| T1                                    | 36               | 0.0 (0.0)                 | 33          | 0.0 (0.2)            | 0.0 (-0.1 to 0)                      | 0.3            |
| T2                                    | 34               | 1.3 (1.7)                 | 31          | 1.1 (1.6)            | 0.2 (-0.7 to 1.0)                    | 0.69           |
| T3                                    | 28               | 0.1 (0.3)                 | 29          | 0.1 (0.4)            | 0.0 (-0.2 to 0.2)                    | 0.73           |
| T4                                    | 28               | 0.4 (0.9)                 | 28          | 0.2 (0.5)            | 0.2 (-0.2 to 0.6)                    | 0.36           |
| Peak FLACC                            | 34               | 2.1 (1.9)                 | 31          | 1.7 (1.5)            | 0.3 (-0.5 to 1.2)                    | 0.41           |
| 2 <sup>nd</sup> Dressing Change       |                  |                           |             |                      |                                      |                |
| T1                                    | 26               | 0.0 (0.0)                 | 28          | 0.0 (0.0)            | 0.0 (0.0)                            | -              |
| T2                                    | 24               | 1.1 (1.7)                 | 27          | 0.6 (1.3)            | 0.5 (-0.4 to 1.3)                    | 0.25           |
| T3                                    | 12               | 0.0 (0.0)                 | 16          | 0.5 (1.5)            | -0.5 (-1.4 to 0.4)                   | 0.28           |
| T4                                    | 12               | 0.2 (0.4)                 | 14          | 0.3 (0.7)            | -0.1 (-0.6 to 0.4)                   | 0.62           |
| Peak FLACC                            | 24               | 1.6 (1.8)                 | 27          | 1.0 (1.6)            | 0.6 (-0.3 to 1.6)                    | 0.20           |
| 3 <sup>rd</sup> Dressing Change       |                  |                           |             |                      |                                      |                |
| T1                                    | 7                | 0.0 (0.0)                 | 14          | 0.0 (0.0)            | 0.0 (0.0)                            | -              |
| T2                                    | 7                | 0.1 (0.4)                 | 12          | 0.6 (0.7)            | -0.4 (-1.0 to 0.1)                   | 0.13           |
| T3                                    | 3                | 0.3 (0.6)                 | 7           | 0.4 (1.1)            | -0.1 (-1.7 to 1.5)                   | 0.9            |
| T4                                    | 3                | 0.0 (0.0)                 | 7           | 0.0 (0.0)            | 0.0 (0.0)                            | -              |
| Peak FLACC                            | 7                | 1.4 (1.4)                 | 13          | 0.8 (0.9)            | 0.6 (-0.5 to 1.7)                    | 0.27           |
| <b>Parent: VAS Observer (0 – 100)</b> |                  |                           |             |                      |                                      |                |
| 1 <sup>st</sup> Dressing Change       |                  |                           |             |                      |                                      |                |
| T1                                    | 34               | 8.2 (18.8)                | 32          | 3.4 (9.7)            | 5 (-3.0 to 12.0)                     | 0.2            |
| T2                                    | 33               | 31.5 (37.9)               | 31          | 18.5 (23.8)          | 13 (-3.0 to 29.0)                    | 0.11           |
| T3                                    | 27               | 18.9 (28.2)               | 29          | 9.7 (17.6)           | 9 (-3.0 to 22.0)                     | 0.14           |
| T4                                    | 27               | 19.1 (26.7)               | 28          | 7.1 (20.2)           | 12 (-1.0 to 25.0)                    | 0.07           |
| Peak VAS                              | 33               | 42.1 (35.2)               | 29          | 29.5 (22.3)          | 13 (-3.0 to 28.0)                    | 0.10           |
| 2 <sup>nd</sup> Dressing Change       |                  |                           |             |                      |                                      |                |
| T1                                    | 25               | 4.4 (11.6)                | 28          | 1.4 (4.5)            | 3 (-2.0 to 8.0)                      | 0.21           |
| T2                                    | 23               | 14.1 (23.2)               | 27          | 9.6 (20.5)           | 5 (-8.0 to 17.0)                     | 0.47           |
| T3                                    | 11               | 7.7 (19.9)                | 15          | 2.7 (4.6)            | 5 (-6.0 to 16.0)                     | 0.35           |
| T4                                    | 11               | 12.3 (21.1)               | 13          | 3.1 (8.5)            | 9 (-4.0 to 22.0)                     | 0.16           |
| Peak VAS                              | 22               | 21.4 (30.3)               | 26          | 13.8 (21.7)          | 8 (-8.0 to 22.0)                     | 0.32           |
| 3 <sup>rd</sup> Dressing Change       |                  |                           |             |                      |                                      |                |
| T1                                    | 7                | 4.3 (11.3)                | 13          | 2.3 (8.3)            | 2 (-7.0 to 11.0)                     | 0.66           |

1  
2  
3  
4  
5  
6  
7  
8  
9  
10  
11  
12  
13  
14  
15  
16  
17  
18  
19  
20  
21  
22  
23  
24  
25  
26  
27  
28  
29  
30  
31  
32  
33  
34  
35  
36  
37  
38  
39  
40  
41  
42  
43  
44  
45  
46  
47  
48  
49  
50  
51  
52  
53  
54  
55  
56  
57  
58  
59  
60

|          |   |             |    |             |                    |      |
|----------|---|-------------|----|-------------|--------------------|------|
| T2       | 6 | 11.7 (16.0) | 11 | 8.2 (10.8)  | 3 (-10.0 to 17.0)  | 0.60 |
| T3       | 6 | 5.0 (7.1)   | 7  | 8.6 (12.1)  | -4 (-25.0 to 18.0) | 0.71 |
| T4       | 3 | 0.0 (0.0)   | 6  | 3.3 (8.2)   | -3 (-18.0 to 12.0) | 0.60 |
| Peak VAS | 5 | 20.0 (14.1) | 11 | 11.8 (11.7) | 8 (-6.0 to 23.0)   | 0.24 |

**Child: FPS – R**1<sup>st</sup> Dressing Change

|              |   |             |    |           |                    |      |
|--------------|---|-------------|----|-----------|--------------------|------|
| T1           | 8 | 0.00 (0.00) | 10 | 0.1 (0.3) | -0.1 (-.3 to .1)   | 0.39 |
| T2           | 9 | 2.7 (4.4)   | 9  | 2.4 (3.4) | 0.2 (-3.7 to 4.1)  | 0.91 |
| T3           | 7 | 2.0 (3.5)   | 8  | 2.3 (3.6) | -0.2 (-4.2 to 3.7) | 0.89 |
| T4           | 7 | 0.3 (0.8)   | 6  | 1.0 (1.7) | -0.7 (-2.3 to .8)  | 0.33 |
| Peak FPS – R | 9 | 2.7 (4.1)   | 7  | 1.7 (2.1) | 1.0 (-2.7 to 4.6)  | 0.59 |

2<sup>nd</sup> Dressing Change

|              |   |             |   |           |                    |      |
|--------------|---|-------------|---|-----------|--------------------|------|
| T1           | 5 | 0.00 (0.00) | 6 | 1.7 (4.1) | -1.7 (-5.8 to 2.5) | 0.39 |
| T2           | 6 | 0.7 (1.6)   | 5 | 2.0 (4.5) | -1.3 (-5.7 to 3.1) | 0.51 |
| T3           | 3 | 0.00 (0.00) | 3 | 1.3 (2.3) | -1.3 (-5 to 2.4)   | 0.37 |
| T4           | 3 | 0.00 (0.00) | 3 | 1.3 (2.3) | -1.3 (-5 to 2.4)   | 0.37 |
| Peak FPS – R | 6 | 1.0 (1.7)   | 8 | 1.3 (3.5) | -0.2 (-3.7 to 3.2) | 0.88 |

3<sup>rd</sup> Dressing Change

|              |   |             |   |           |                      |      |
|--------------|---|-------------|---|-----------|----------------------|------|
| T1           | 2 | 0.00 (0.00) | 3 | 3.3 (5.8) | -3.3 (-17 to 10.4)   | 0.50 |
| T2           | 2 | 1.0 (1.4)   | 3 | 3.3 (5.8) | -2.3 (-16.2 to 11.6) | 0.63 |
| T3           | 2 | 1.0 (1.4)   | 2 | 0.0 (0.0) | 1.0 (-3.3 to 5.3)    | 0.42 |
| T4           | 2 | 2.0 (2.8)   | 0 | -         | -                    | -    |
| Peak FPS – R | 2 | 3.0 (1.4)   | 3 | 3.3 (5.8) | -0.3 (-14.2 to 13.6) | 0.94 |

**Child: VAS**1<sup>st</sup> Dressing Change

|          |   |             |   |             |                |      |
|----------|---|-------------|---|-------------|----------------|------|
| T1       | 8 | 21.9 (27.5) | 7 | 7.1 (15.0)  | 15 (-11 to 40) | 0.23 |
| T2       | 7 | 45.7 (41.6) | 5 | 8.0 (11.0)  | 38 (-5 to 81)  | 0.08 |
| T3       | 6 | 33.3 (37.8) | 4 | 30.0 (47.6) | 3 (-59 to 65)  | 0.90 |
| T4       | 5 | 28.0 (25.9) | 4 | 25.0 (50.0) | 3 (-57 to 63)  | 0.91 |
| Peak VAS | 8 | 52.5 (41.)  | 6 | 23.3 (40.8) | 29 (-19 to 77) | 0.21 |

2<sup>nd</sup> Dressing Change

|          |   |             |   |            |                |      |
|----------|---|-------------|---|------------|----------------|------|
| T1       | 8 | 16.3 (22.0) | 5 | 4.0 (8.9)  | 12 (-11 to 35) | 0.27 |
| T2       | 7 | 27.9 (27.4) | 5 | 4.0 (8.9)  | 24 (-5 to 52)  | 0.09 |
| T3       | 5 | 16.0 (26.1) | 3 | 6.7 (11.5) | 9 (-31 to 49)  | 0.59 |
| T4       | 5 | 12.0 (17.9) | 3 | 0.0 (0.0)  | 12 (-14 to 38) | 0.30 |
| Peak VAS | 8 | 34.4 (31.3) | 7 | 5.7 (9.8)  | 29 (2 to 55)   | 0.04 |

3<sup>rd</sup> Dressing Change

|    |   |            |   |           |              |      |
|----|---|------------|---|-----------|--------------|------|
| T1 | 3 | 8.3 (14.4) | 2 | 0.0 (0.0) | 8 (-26 – 43) | 0.50 |
|----|---|------------|---|-----------|--------------|------|

|          |   |             |   |            |                 |        |
|----------|---|-------------|---|------------|-----------------|--------|
| T2       | 3 | 26.7 (25.2) | 2 | 15.0 (7.1) | 12 (-49 to 73)  | 0.58   |
| T3       | 2 | 5.0 (7.1)   | 2 | 5.0 (7.1)  | 0 (-30 to 30)   | > 0.99 |
| T4       | 2 | 20.0 (28.3) | 2 | 0.0 (0.0)  | 20 (-66 to 106) | 0.42   |
| Peak VAS | 2 | 40.0 (14.1) | 2 | 15.0 (7.1) | 25 (-23 to 73)  | 0.15   |

\* Adjusted Mean Difference = Intervention Group – Control Group. FLACC = face, legs, activity, cry, consolability scale; VAS = visual analogue scale; FPS-R = faces pain scale revises; SD = standard deviation; CI = confidence interval; T1 = timepoint 1; T2 = timepoint 2; T3 = timepoint 3; T4 = timepoint 4.

For peer review only

**Appendix D. Staff and caregiver perspectives on dressings**

| Assessor        | Dressing Measure             | Control (PVC film) |             | Intervention (HBD) |             | <i>p</i> value |
|-----------------|------------------------------|--------------------|-------------|--------------------|-------------|----------------|
|                 |                              | N                  | Mean (SD)   | N                  | Mean (SD)   |                |
| <b>ED Staff</b> |                              |                    |             |                    |             |                |
|                 | Ease of dressing application | 8                  | 8.00 (1.85) | 15                 | 9.53 (0.99) | 0.056          |
|                 | Ease of dressing removal     | 9                  | 9.78 (0.67) | 16                 | 9.88 (0.50) | 0.709          |
|                 | Flexibility                  | 9                  | 8.22 (1.99) | 16                 | 9.56 (0.73) | 0.082          |
|                 | Conformity                   | 9                  | 7.89 (2.09) | 16                 | 8.44 (1.50) | 0.500          |
| <b>Parents</b>  |                              |                    |             |                    |             |                |
|                 | Ease of dressing application | 16                 | 7.63 (2.66) | 24                 | 9.54 (0.88) | 0.013          |
|                 | Ease of dressing removal     | 16                 | 8.62 (2.28) | 24                 | 9.88 (0.34) | 0.045          |
|                 | Comfort                      | 16                 | 8.19 (2.61) | 24                 | 8.96 (1.88) | 0.318          |
|                 | Ease of movement             | 16                 | 7.81 (2.59) | 24                 | 9.29 (1.30) | 0.047          |

ED = emergency department; PVC = polyvinylchloride film; HBD = hydrogel burn dressing; N = number of participants; SD = standard deviation

### Appendix E. Pain score frequencies during acute care in the ED

| Pain Scale and Timepoint    | Pain Score | N (Intervention) | Burnaid® N (%) | N (Control)   | Plastic Wrap N (%) |
|-----------------------------|------------|------------------|----------------|---------------|--------------------|
| <b>FLACC (0 – 10 scale)</b> |            | <i>n</i> = 35    |                | <i>n</i> = 23 |                    |
| T1                          | 0          |                  | 18 (51%)       |               | 16 (70%)           |
|                             | 1          |                  | 9 (26%)        |               | 3 (13%)            |
|                             | 2          |                  | 4 (11%)        |               | 2 (9%)             |
|                             | 3          |                  | 1 (3%)         |               | 1 (4%)             |
|                             | 5          |                  | 1 (3%)         |               | 0 (0%)             |
|                             | 6          |                  | 1 (3%)         |               | 1 (4%)             |
|                             | 10         |                  | 1 (3%)         |               | 0 (0%)             |
| T2                          |            | <i>n</i> = 36    |                | <i>n</i> = 35 |                    |
|                             | 0          |                  | 30 (83%)       |               | 26 (74%)           |
|                             | 1          |                  | 1 (3%)         |               | 5 (14%)            |
|                             | 2          |                  | 3 (8%)         |               | 4 (11%)            |
|                             | 3          |                  | 1 (3%)         |               | 0 (0%)             |
| T3                          |            | <i>n</i> = 36    |                | <i>n</i> = 34 |                    |
|                             | 0          |                  | 31 (86%)       |               | 24 (71%)           |
|                             | 1          |                  | 1 (3%)         |               | 5 (15%)            |
|                             | 2          |                  | 2 (6%)         |               | 4 (12%)            |
|                             | 3          |                  | 1 (3%)         |               | 0 (0%)             |
|                             | 6          |                  | 1 (3%)         |               | 0 (0%)             |
| T4                          |            | <i>n</i> = 35    |                | <i>n</i> = 33 |                    |
|                             | 0          |                  | 26 (74%)       |               | 24 (73%)           |
|                             | 1          |                  | 2 (6%)         |               | 2 (6%)             |
|                             | 2          |                  | 3 (9%)         |               | 4 (12%)            |
|                             | 3          |                  | 1 (3%)         |               | 1 (3%)             |
|                             | 4          |                  | 2 (6%)         |               | 1 (3%)             |
|                             | 7          |                  | 0 (0%)         |               | 1 (3%)             |
|                             | 8          |                  | 1 (3%)         |               | 0 (0%)             |
| Peak FLACC                  |            | <i>n</i> = 36    |                | <i>n</i> = 34 |                    |
|                             | 0          |                  | 5 (14%)        |               | 4 (12%)            |
|                             | 1          |                  | 3 (8%)         |               | 4 (12%)            |
|                             | 2          |                  | 7 (19%)        |               | 3 (9%)             |
|                             | 3          |                  | 6 (17%)        |               | 4 (12%)            |

1  
2  
3  
4  
5  
6  
7  
8  
9  
10  
11  
12  
13  
14  
15  
16  
17  
18  
19  
20  
21  
22  
23  
24  
25  
26  
27  
28  
29  
30  
31  
32  
33  
34  
35  
36  
37  
38  
39  
40  
41  
42  
43  
44  
45  
46  
47  
48  
49  
50  
51  
52  
53  
54  
55  
56  
57  
58  
59  
60

|  |                                     | 4             | 5 (14%)  | 7 (21%)       |
|--|-------------------------------------|---------------|----------|---------------|
|  |                                     | 5             | 2 (6%)   | 2 (6%)        |
|  |                                     | 6             | 3 (8%)   | 4 (12%)       |
|  |                                     | 7             | 2 (6%)   | 1 (3%)        |
|  |                                     | 8             | 3 (8%)   | 3 (9%)        |
|  |                                     | 9             | 0 (0%)   | 1 (3%)        |
|  |                                     | 10            | 0 (0%)   | 1 (3%)        |
|  | <b>Observer VAS (0 – 100 scale)</b> |               |          |               |
|  |                                     | <i>n</i> = 34 |          | <i>n</i> = 22 |
|  | T1                                  | 0             | 9 (26%)  | 4 (18%)       |
|  |                                     | 10            | 3 (9%)   | 3 (14%)       |
|  |                                     | 20            | 4 (12%)  | 1 (5%)        |
|  |                                     | 30            | 4 (12%)  | 3 (14%)       |
|  |                                     | 40            | 4 (12%)  | 6 (27%)       |
|  |                                     | 50            | 0 (0%)   | 4 (18%)       |
|  |                                     | 55            | 1 (3%)   | 0 (0%)        |
|  |                                     | 60            | 4 (12%)  | 0 (0%)        |
|  |                                     | 70            | 3 (9%)   | 0 (0%)        |
|  |                                     | 80            | 1 (3%)   | 1 (5%)        |
|  |                                     | 100           | 1 (3%)   | 0 (0%)        |
|  | T2                                  | <i>n</i> = 34 |          | <i>n</i> = 31 |
|  |                                     | 0             | 14 (41%) | 10 (32%)      |
|  |                                     | 10            | 1 (3%)   | 3 (10%)       |
|  |                                     | 20            | 6 (18%)  | 5 (16%)       |
|  |                                     | 25            | 0 (0%)   | 1 (3%)        |
|  |                                     | 30            | 4 (12%)  | 5 (16%)       |
|  |                                     | 35            | 0 (0%)   | 1 (3%)        |
|  |                                     | 40            | 2 (6%)   | 2 (6%)        |
|  |                                     | 50            | 1 (3%)   | 2 (6%)        |
|  |                                     | 60            | 4 (12%)  | 2 (6%)        |
|  |                                     | 70            | 2 (6%)   | 0 (0%)        |
|  | T3                                  | <i>n</i> = 35 |          | <i>n</i> = 34 |
|  |                                     | 0             | 15 (43%) | 14 (41%)      |
|  |                                     | 10            | 2 (6%)   | 7 (21%)       |
|  |                                     | 20            | 7 (20%)  | 4 (12%)       |
|  |                                     | 30            | 5 (14%)  | 3 (9%)        |
|  |                                     | 40            | 1 (3%)   | 1 (3%)        |
|  |                                     | 50            | 2 (6%)   | 2 (6%)        |
|  |                                     | 60            | 3 (9%)   | 1 (3%)        |

1  
2  
3  
4  
5  
6  
7  
8  
9  
10  
11  
12  
13  
14  
15  
16  
17  
18  
19  
20  
21  
22  
23  
24  
25  
26  
27  
28  
29  
30  
31  
32  
33  
34  
35  
36  
37  
38  
39  
40  
41  
42  
43  
44  
45  
46  
47  
48  
49  
50  
51  
52  
53  
54  
55  
56  
57  
58  
59  
60

|  |                               | 80            | 0 (0%)   | 1 (3%)        |
|--|-------------------------------|---------------|----------|---------------|
|  |                               | 100           | 0 (0%)   | 1 (3%)        |
|  | T4                            | <i>n</i> = 33 |          | <i>n</i> = 32 |
|  |                               | 0             | 12 (36%) | 16 (50%)      |
|  |                               | 10            | 2 (6%)   | 4 (13%)       |
|  |                               | 20            | 6 (18%)  | 5 (16%)       |
|  |                               | 30            | 4 (12%)  | 0 (0%)        |
|  |                               | 40            | 1 (3%)   | 1 (3%)        |
|  |                               | 50            | 3 (9%)   | 2 (6%)        |
|  |                               | 60            | 4 (12%)  | 2 (6%)        |
|  |                               | 70            | 0 (0%)   | 1 (3%)        |
|  |                               | 100           | 1 (3%)   | 1 (3%)        |
|  | <b>FPS – R (0 – 10 scale)</b> | <i>n</i> = 9  |          | <i>n</i> = 7  |
|  | T1                            |               |          |               |
|  |                               | 0             | 4 (44%)  | 1 (14%)       |
|  |                               | 2             | 0 (0%)   | 2 (29%)       |
|  |                               | 4             | 3 (33%)  | 2 (29%)       |
|  |                               | 5             | 0 (0%)   | 1 (14%)       |
|  |                               | 8             | 1 (11%)  | 1 (14%)       |
|  |                               | 10            | 1 (11%)  | 0 (0%)        |
|  | T2                            | <i>n</i> = 10 |          | <i>n</i> = 9  |
|  |                               | 0             | 6 (60%)  | 4 (44%)       |
|  |                               | 2             | 1 (10%)  | 2 (22%)       |
|  |                               | 4             | 0 (0%)   | 1 (11%)       |
|  |                               | 6             | 1 (10%)  | 1 (11%)       |
|  |                               | 8             | 0 (0%)   | 1 (11%)       |
|  |                               | 10            | 2 (20%)  | 0 (0%)        |
|  | T3                            | <i>n</i> = 11 |          | <i>n</i> = 11 |
|  |                               | 0             | 8 (73%)  | 9 (82%)       |
|  |                               | 1             | 1 (9%)   | 0 (0%)        |
|  |                               | 4             | 0 (0%)   | 1 (9%)        |
|  |                               | 6             | 1 (9%)   | 0 (0%)        |
|  |                               | 10            | 1 (9%)   | 1 (9%)        |
|  | T4                            | <i>n</i> = 10 |          | <i>n</i> = 10 |
|  |                               | 0             | 4 (40%)  | 5 (50%)       |
|  |                               | 1             | 1 (10%)  | 0 (0%)        |
|  |                               | 2             | 1 (10%)  | 2 (20%)       |
|  |                               | 4             | 1 (10%)  | 0 (0%)        |



|  |                                              | 6             | 2 (20%) | 1 (10%)      |
|--|----------------------------------------------|---------------|---------|--------------|
|  |                                              | 10            | 1 (10%) | 2 (20%)      |
|  | <b>Child Self-report VAS (0 – 100 scale)</b> | <i>n</i> = 9  |         | <i>n</i> = 2 |
|  | T1                                           | 0             | 2 (22%) | 0 (0%)       |
|  |                                              | 10            | 0 (0%)  | 1 (50%)      |
|  |                                              | 20            | 1 (11%) | 0 (0%)       |
|  |                                              | 30            | 1 (11%) | 1 (50%)      |
|  |                                              | 40            | 1 (11%) | 0 (0%)       |
|  |                                              | 50            | 2 (22%) | 0 (0%)       |
|  |                                              | 70            | 1 (11%) | 0 (0%)       |
|  |                                              | 85            | 1 (11%) | 0 (0%)       |
|  | T2                                           | <i>n</i> = 10 |         | <i>n</i> = 4 |
|  |                                              | 0             | 4 (40%) | 1 (25%)      |
|  |                                              | 10            | 0 (0%)  | 1 (25%)      |
|  |                                              | 20            | 3 (30%) | 1 (25%)      |
|  |                                              | 30            | 1 (10%) | 0 (0%)       |
|  |                                              | 50            | 1 (10%) | 0 (0%)       |
|  |                                              | 60            | 1 (10%) | 0 (0%)       |
|  |                                              | 80            | 0 (0%)  | 1 (25%)      |
|  | T3                                           | <i>n</i> = 11 |         | <i>n</i> = 5 |
|  |                                              | 0             | 5 (45%) | 4 (80%)      |
|  |                                              | 10            | 1 (9%)  | 0 (0%)       |
|  |                                              | 20            | 3 (27%) | 0 (0%)       |
|  |                                              | 40            | 0 (0%)  | 1 (20%)      |
|  |                                              | 50            | 1 (9%)  | 0 (0%)       |
|  |                                              | 60            | 1 (9%)  | 0 (0%)       |
|  | T4                                           | <i>n</i> = 7  |         | <i>n</i> = 4 |
|  |                                              | 0             | 2 (29%) | 2 (50%)      |
|  |                                              | 10            | 0 (0%)  | 1 (25%)      |
|  |                                              | 20            | 1 (14%) | 0 (0%)       |
|  |                                              | 40            | 2 (29%) | 0 (0%)       |
|  |                                              | 55            | 1 (14%) | 0 (0%)       |
|  |                                              | 60            | 1 (14%) | 0 (0%)       |
|  |                                              | 90            | 0 (0%)  | 1 (25%)      |

N = number of participants; FLACC = face, legs, activity, cry, consolability scale; VAS = visual analogue scale; FPS-R = faces pain scale revises; Ag = silver dressing; T1 = timepoint 1; T2 = timepoint 2; T3 = timepoint 3; T4 = timepoint 4.

1  
2  
3  
4  
5  
6  
7

## CONSORT Reporting Checklist for Randomised Trials

|                           | Reporting Item                                                                                                                                                                    | Page Number    |
|---------------------------|-----------------------------------------------------------------------------------------------------------------------------------------------------------------------------------|----------------|
| <b>Title and Abstract</b> |                                                                                                                                                                                   |                |
| Title                     | <a href="#">#1a</a> Identification as a randomized trial in the title.                                                                                                            | 0 (Title Page) |
| Abstract                  | <a href="#">#1b</a> Structured summary of trial design, methods, results, and conclusions                                                                                         | 1 - 2          |
| <b>Introduction</b>       |                                                                                                                                                                                   |                |
| Background and objectives | <a href="#">#2a</a> Scientific background and explanation of rationale                                                                                                            | 3 - 4          |
| Background and objectives | <a href="#">#2b</a> Specific objectives or hypothesis                                                                                                                             | 3 - 4          |
| <b>Methods</b>            |                                                                                                                                                                                   |                |
| Trial design              | <a href="#">#3a</a> Description of trial design (such as parallel, factorial) including allocation ratio.                                                                         | 4              |
| Trial design              | <a href="#">#3b</a> Important changes to methods after trial commencement (such as eligibility criteria), with reasons                                                            | 8              |
| Participants              | <a href="#">#4a</a> Eligibility criteria for participants                                                                                                                         | 5              |
| Participants              | <a href="#">#4b</a> Settings and locations where the data were collected                                                                                                          | 4              |
| Interventions             | <a href="#">#5</a> The experimental and control interventions for each group with sufficient details to allow replication, including how and when they were actually administered | 5 - 7          |
| Outcomes                  | <a href="#">#6a</a> Completely defined prespecified primary and secondary outcome measures, including how and when they were assessed                                             | 7 - 9          |
| Outcomes                  | <a href="#">#6b</a> Any changes to trial outcomes after the trial commenced, with reasons                                                                                         | NA             |
| Sample size               | <a href="#">#7a</a> How sample size was determined.                                                                                                                               | 9              |

|    |                          |                      |                                                                              |         |
|----|--------------------------|----------------------|------------------------------------------------------------------------------|---------|
| 1  | Sample size              | <a href="#">#7b</a>  | When applicable, explanation of any interim analyses and stopping guidelines | NA      |
| 2  |                          |                      |                                                                              |         |
| 3  |                          |                      |                                                                              |         |
| 4  |                          |                      |                                                                              |         |
| 5  | Randomization -          | <a href="#">#8a</a>  | Method used to generate the random allocation sequence.                      | 5 - 6   |
| 6  | Sequence generation      |                      |                                                                              |         |
| 7  |                          |                      |                                                                              |         |
| 8  |                          |                      |                                                                              |         |
| 9  | Randomization -          | <a href="#">#8b</a>  | Type of randomization; details of any restriction (such as                   | NA      |
| 10 | Sequence generation      |                      | blocking and block size)                                                     |         |
| 11 |                          |                      |                                                                              |         |
| 12 |                          |                      |                                                                              |         |
| 13 | Randomization -          | <a href="#">#9</a>   | Mechanism used to implement the random allocation                            | 5 - 6   |
| 14 | Allocation concealment   |                      | sequence (such as sequentially numbered containers),                         |         |
| 15 | mechanism                |                      | describing any steps taken to conceal the sequence until                     |         |
| 16 |                          |                      | interventions were assigned                                                  |         |
| 17 |                          |                      |                                                                              |         |
| 18 |                          |                      |                                                                              |         |
| 19 |                          |                      |                                                                              |         |
| 20 | Randomization -          | <a href="#">#10</a>  | Who generated the allocation sequence, who enrolled                          | 5 - 6   |
| 21 | Implementation           |                      | participants, and who assigned participants to interventions                 |         |
| 22 |                          |                      |                                                                              |         |
| 23 |                          |                      |                                                                              |         |
| 24 | Blinding                 | <a href="#">#11a</a> | If done, who was blinded after assignment to interventions                   | 5 - 6   |
| 25 |                          |                      | (for example, participants, care providers, those assessing                  |         |
| 26 |                          |                      | outcomes) and how.                                                           |         |
| 27 |                          |                      |                                                                              |         |
| 28 |                          |                      |                                                                              |         |
| 29 |                          |                      |                                                                              |         |
| 30 | Blinding                 | <a href="#">#11b</a> | If relevant, description of the similarity of interventions                  | 3       |
| 31 |                          |                      |                                                                              |         |
| 32 | Statistical methods      | <a href="#">#12a</a> | Statistical methods used to compare groups for primary and                   | 9 - 10  |
| 33 |                          |                      | secondary outcomes                                                           |         |
| 34 |                          |                      |                                                                              |         |
| 35 |                          |                      |                                                                              |         |
| 36 | Statistical methods      | <a href="#">#12b</a> | Methods for additional analyses, such as subgroup analyses                   | 10      |
| 37 |                          |                      | and adjusted analyses                                                        |         |
| 38 |                          |                      |                                                                              |         |
| 39 |                          |                      |                                                                              |         |
| 40 | <b>Results</b>           |                      |                                                                              |         |
| 41 |                          |                      |                                                                              |         |
| 42 | Participant flow diagram | <a href="#">#13a</a> | For each group, the numbers of participants who were                         | 5       |
| 43 | (strongly recommended)   |                      | randomly assigned, received intended treatment, and were                     |         |
| 44 |                          |                      | analysed for the primary outcome                                             |         |
| 45 |                          |                      |                                                                              |         |
| 46 |                          |                      |                                                                              |         |
| 47 |                          |                      |                                                                              |         |
| 48 | Participant flow         | <a href="#">#13b</a> | For each group, losses and exclusions after randomization,                   | 5       |
| 49 |                          |                      | together with reason                                                         |         |
| 50 |                          |                      |                                                                              |         |
| 51 |                          |                      |                                                                              |         |
| 52 | Recruitment              | <a href="#">#14a</a> | Dates defining the periods of recruitment and follow-up                      | 4       |
| 53 |                          |                      |                                                                              |         |
| 54 | Recruitment              | <a href="#">#14b</a> | Why the trial ended or was stopped                                           | NA      |
| 55 |                          |                      |                                                                              |         |
| 56 |                          |                      |                                                                              |         |
| 57 | Baseline data            | <a href="#">#15</a>  | A table showing baseline demographic and clinical                            | 11 - 13 |
| 58 |                          |                      | characteristics for each group                                               |         |
| 59 |                          |                      |                                                                              |         |
| 60 |                          |                      |                                                                              |         |

|    |                          |                      |                                                                 |         |
|----|--------------------------|----------------------|-----------------------------------------------------------------|---------|
| 1  | Numbers analysed         | <a href="#">#16</a>  | For each group, number of participants (denominator)            | 11 - 18 |
| 2  |                          |                      | included in each analysis and whether the analysis was by       |         |
| 3  |                          |                      | original assigned groups                                        |         |
| 4  |                          |                      |                                                                 |         |
| 5  |                          |                      |                                                                 |         |
| 6  | Outcomes and estimation  | <a href="#">#17a</a> | For each primary and secondary outcome, results for each        | 14 – 18 |
| 7  |                          |                      | group, and the estimated effect size and its precision (such as |         |
| 8  |                          |                      | 95% confidence interval)                                        |         |
| 9  |                          |                      |                                                                 |         |
| 10 |                          |                      |                                                                 |         |
| 11 |                          |                      |                                                                 |         |
| 12 | Outcomes and estimation  | <a href="#">#17b</a> | For binary outcomes, presentation of both absolute and          | NA      |
| 13 |                          |                      | relative effect sizes is recommended                            |         |
| 14 |                          |                      |                                                                 |         |
| 15 |                          |                      |                                                                 |         |
| 16 | Ancillary analyses       | <a href="#">#18</a>  | Results of any other analyses performed, including subgroup     | 15 - 18 |
| 17 |                          |                      | analyses and adjusted analyses, distinguishing pre-specified    |         |
| 18 |                          |                      | from exploratory                                                |         |
| 19 |                          |                      |                                                                 |         |
| 20 |                          |                      |                                                                 |         |
| 21 | Harms                    | <a href="#">#19</a>  | All important harms or unintended effects in each group (For    | 13      |
| 22 |                          |                      | specific guidance see CONSORT for harms)                        |         |
| 23 |                          |                      |                                                                 |         |
| 24 |                          |                      |                                                                 |         |
| 25 |                          |                      |                                                                 |         |
| 26 | <b>Discussion</b>        |                      |                                                                 |         |
| 27 |                          |                      |                                                                 |         |
| 28 | Limitations              | <a href="#">#20</a>  | Trial limitations, addressing sources of potential bias,        | 19      |
| 29 |                          |                      | imprecision, and, if relevant, multiplicity of analyses         |         |
| 30 |                          |                      |                                                                 |         |
| 31 |                          |                      |                                                                 |         |
| 32 | Interpretation           | <a href="#">#22</a>  | Interpretation consistent with results, balancing benefits and  | 19 – 20 |
| 33 |                          |                      | harms, and considering other relevant evidence                  |         |
| 34 |                          |                      |                                                                 |         |
| 35 |                          |                      |                                                                 |         |
| 36 | Registration             | <a href="#">#23</a>  | Registration number and name of trial registry                  | 4       |
| 37 |                          |                      |                                                                 |         |
| 38 |                          |                      |                                                                 |         |
| 39 | <b>Other Information</b> |                      |                                                                 |         |
| 40 |                          |                      |                                                                 |         |
| 41 | Protocol                 | <a href="#">#24</a>  | Where the full trial protocol can be accessed, if available     | 4       |
| 42 |                          |                      |                                                                 |         |
| 43 | Funding                  | <a href="#">#25</a>  | Sources of funding and other support (such as supply of         | 24      |
| 44 |                          |                      | drugs), role of funders                                         |         |
| 45 |                          |                      |                                                                 |         |
| 46 |                          |                      |                                                                 |         |

Based on the CONSORT guidelines

Schulz KF, Altman DG, Moher D, for the CONSORT Group. CONSORT 2010 Statement: updated guidelines for reporting parallel group randomised trials
