# Supplementary material for: Effectiveness of a hydrogel dressing as an analgesic adjunct to first aid for the treatment of acute paediatric burn injuries: a prospective randomised controlled trial
Source: PubMed Central journal article supplement — BMJ Open. 2021 Jan 5;11(1):e039981. doi: 10.1136/bmjopen-2020-039981 (PMC7786810; doi:10.1136/bmjopen-2020-039981), 2021-01-05
Supplement: bmjopen-2020-039981supp001.pdf [file bmjopen-2020-039981supp001.pdf]

**Appendix A.** Exact agreement between clinicians assessing time to re-epithelialization: Treating surgical consultant versus blinded expert panel

| Clinicians                | Agreement between Clinicians |
|---------------------------|------------------------------|
| Consultant and Reviewer 1 | 64%                          |
| Consultant and Reviewer 2 | 64%                          |
| Consultant and Reviewer 3 | 69%                          |
| Reviewer 1 and Reviewer 2 | 71%                          |
| Reviewer 1 and Reviewer 3 | 71%                          |
| Reviewer 2 and Reviewer 3 | 75%                          |
