# Supplementary material for: Effectiveness of a hydrogel dressing as an analgesic adjunct to first aid for the treatment of acute paediatric burn injuries: a prospective randomised controlled trial
Source: PubMed Central journal article supplement — BMJ Open. 2021 Jan 5;11(1):e039981. doi: 10.1136/bmjopen-2020-039981 (PMC7786810; doi:10.1136/bmjopen-2020-039981), 2021-01-05
Supplement: bmjopen-2020-039981supp002.pdf [file bmjopen-2020-039981supp002.pdf]

## Appendix B. Physiological measures at follow up dressing changes

| Measure                              | Time point                      | Intervention<br>Mean (SD)       | Control<br>Mean (SD)          | Adjusted Mean<br>Difference (95% CI) | <i>p</i> value |
|--------------------------------------|---------------------------------|---------------------------------|-------------------------------|--------------------------------------|----------------|
| Pulse rate<br>(beats/minute)         | 1 <sup>st</sup> Dressing Change |                                 |                               |                                      |                |
|                                      | T1                              | 104.1 (21.7)                    | 109.9 (19.0)                  | -6 (-17 to 5)                        | 0.29           |
|                                      | T2                              | 100.4 (23.6)                    | 104.9 (17.4)                  | -4 (-17 to 8)                        | 0.47           |
|                                      | T3                              | 98.3 (25.8)                     | 104.9 (15.3)                  | -7 (-20 to 7)                        | 0.33           |
|                                      | T4                              | 99.3 (24.1)                     | 109.6 (19.68)                 | -10 (-24 – 3)                        | 0.13           |
|                                      | 2 <sup>nd</sup> Dressing Change |                                 |                               |                                      |                |
|                                      | T1                              | 104.2 (21.4)                    | 119.1 (22.7)                  | -15 (-30 to 0)                       | 0.05           |
|                                      | T2                              | 100.9 (20.9)                    | 109.9 (23.0)                  | -9 (-25 to 7)                        | 0.25           |
|                                      | T3                              | 95.7 (20.5)                     | 104.0 (20.6)                  | -8 (-29 to 12)                       | 0.41           |
|                                      | T4                              | 95.7 (21.5)                     | 104.3 (19.9)                  | -9 (-33 to 16)                       | 0.45           |
|                                      | 3 <sup>rd</sup> Dressing Change |                                 |                               |                                      |                |
|                                      | T1                              | 108 (12.2)                      | 111.3 (27.8)                  | -3 (-33 to 16)                       | 0.81           |
|                                      | T2                              | 98.4 (19.9)                     | 103.9 (18.8)                  | -6 (-33 to 16)                       | 0.60           |
|                                      | T3                              | 95.3 (24.2)                     | 94.8 (19.0)                   | 1 (-33 to 16)                        | 0.97           |
|                                      | T4                              | 96.3 (31.1)                     | 102.0 (28.3)                  | -9 (-33 to 16)                       | 0.81           |
|                                      | Temperature<br>(° Celsius)      | 1 <sup>st</sup> Dressing Change |                               |                                      |                |
| T1                                   |                                 | 36.1 (0.4)                      | 36.0 (0.4)                    | 0.05 (-0.17 to 0.26)                 | 0.66           |
| T2                                   |                                 | 36.3 (0.6)                      | 36.2 (0.5)                    | 0.05 (-0.23 to 0.33)                 | 0.71           |
| T3                                   |                                 | 36.2 (0.4)                      | 36.2 (0.5)                    | -0.05 (-0.29 to 0.19)                | 0.66           |
| T4                                   |                                 | 36.2 (0.4)                      | 36.3 (0.5)                    | -0.03 (-0.29 to 0.22)                | 0.81           |
| 2 <sup>nd</sup> Dressing Change      |                                 |                                 |                               |                                      |                |
| T1                                   |                                 | 35.9 (0.4)                      | 35.9 (0.4)                    | 0.02 (-0.21 to 0.25)                 | 0.85           |
| T2                                   |                                 | 36.2 (0.4)                      | 36.3 (0.5)                    | -0.08 (-0.35 to 0.25)                | 0.57           |
| T3                                   |                                 | 36.3 (0.4)                      | 36.3 (0.4)                    | -0.02 (-0.37 to 0.25)                | 0.9            |
| T4                                   |                                 | 36.2 (0.4)                      | 36.3 (0.3)                    | -0.16 (-0.43 to 0.25)                | 0.23           |
| 3 <sup>rd</sup> Dressing Change      |                                 |                                 |                               |                                      |                |
| T1                                   |                                 | 36.2 (0.9)                      | 36.1 (0.4)                    | 0.19 (-0.44 to 0.83)                 | 0.53           |
| T2                                   | 36.6 (0.6)                      | 36.4 (0.3)                      | 0.18 (-0.27 to 0.63)          | 0.4                                  |                |
| T3                                   | 36.8 (0.4)                      | 36.2 (0.3)                      | 0.52 (-0.02 to 1.06)          | 0.06                                 |                |
| T4                                   | 36.9 (0.5)                      | 36.4 (0.2)                      | 0.5 (-0.02 to 1.02)           | 0.06                                 |                |
| Salivary $\alpha$ -amylase<br>(U/mL) | 1 <sup>st</sup> Dressing Change |                                 |                               |                                      |                |
|                                      | T1                              | † Mean (×/SD)<br>39 (24 – 70)   | † Mean (×/SD)<br>43 (23 – 65) | 1.00 (0.65 to 1.56)                  | 0.97           |
| 2 <sup>nd</sup> Dressing Change      |                                 |                                 |                               |                                      |                |
| T1                                   | 43 (17 – 106)                   | 28 (14 – 77)                    | 1.14 (0.48 to 2.71)           | 0.75                                 |                |

SD = standard deviation; CI = confidence interval. U/mL = units per milliliter; T1 = timepoint 1; T2 = timepoint 2; T3 = timepoint 3; T4 = timepoint 4. \* Adjusted Mean Difference = Intervention Group – Control Group.
