# Supplementary material for: Effectiveness of a hydrogel dressing as an analgesic adjunct to first aid for the treatment of acute paediatric burn injuries: a prospective randomised controlled trial
Source: PubMed Central journal article supplement — BMJ Open. 2021 Jan 5;11(1):e039981. doi: 10.1136/bmjopen-2020-039981 (PMC7786810; doi:10.1136/bmjopen-2020-039981), 2021-01-05
Supplement: bmjopen-2020-039981supp003.pdf [file bmjopen-2020-039981supp003.pdf]

## Appendix C. Pain at dressing changes one, two, and three

| Pain Assessment Timepoint             | N (Intervention) | Intervention<br>Mean (SD) | N (Control) | Control<br>Mean (SD) | Adjusted Mean<br>Difference (95% CI) | p value |
|---------------------------------------|------------------|---------------------------|-------------|----------------------|--------------------------------------|---------|
| <b>Nurse: FLACC (0 – 10)</b>          |                  |                           |             |                      |                                      |         |
| 1 <sup>st</sup> Dressing Change       |                  |                           |             |                      |                                      |         |
| T1                                    | 36               | 0.0 (0.0)                 | 33          | 0.0 (0.2)            | 0.0 (-0.1 to 0)                      | 0.3     |
| T2                                    | 34               | 1.3 (1.7)                 | 31          | 1.1 (1.6)            | 0.2 (-0.7 to 1.0)                    | 0.69    |
| T3                                    | 28               | 0.1 (0.3)                 | 29          | 0.1 (0.4)            | 0.0 (-0.2 to 0.2)                    | 0.73    |
| T4                                    | 28               | 0.4 (0.9)                 | 28          | 0.2 (0.5)            | 0.2 (-0.2 to 0.6)                    | 0.36    |
| Peak FLACC                            | 34               | 2.1 (1.9)                 | 31          | 1.7 (1.5)            | 0.3 (-0.5 to 1.2)                    | 0.41    |
| 2 <sup>nd</sup> Dressing Change       |                  |                           |             |                      |                                      |         |
| T1                                    | 26               | 0.0 (0.0)                 | 28          | 0.0 (0.0)            | 0.0 (0.0)                            | -       |
| T2                                    | 24               | 1.1 (1.7)                 | 27          | 0.6 (1.3)            | 0.5 (-0.4 to 1.3)                    | 0.25    |
| T3                                    | 12               | 0.0 (0.0)                 | 16          | 0.5 (1.5)            | -0.5 (-1.4 to 0.4)                   | 0.28    |
| T4                                    | 12               | 0.2 (0.4)                 | 14          | 0.3 (0.7)            | -0.1 (-0.6 to 0.4)                   | 0.62    |
| Peak FLACC                            | 24               | 1.6 (1.8)                 | 27          | 1.0 (1.6)            | 0.6 (-0.3 to 1.6)                    | 0.20    |
| 3 <sup>rd</sup> Dressing Change       |                  |                           |             |                      |                                      |         |
| T1                                    | 7                | 0.0 (0.0)                 | 14          | 0.0 (0.0)            | 0.0 (0.0)                            | -       |
| T2                                    | 7                | 0.1 (0.4)                 | 12          | 0.6 (0.7)            | -0.4 (-1.0 to 0.1)                   | 0.13    |
| T3                                    | 3                | 0.3 (0.6)                 | 7           | 0.4 (1.1)            | -0.1 (-1.7 to 1.5)                   | 0.9     |
| T4                                    | 3                | 0.0 (0.0)                 | 7           | 0.0 (0.0)            | 0.0 (0.0)                            | -       |
| Peak FLACC                            | 7                | 1.4 (1.4)                 | 13          | 0.8 (0.9)            | 0.6 (-0.5 to 1.7)                    | 0.27    |
| <b>Parent: VAS Observer (0 – 100)</b> |                  |                           |             |                      |                                      |         |
| 1 <sup>st</sup> Dressing Change       |                  |                           |             |                      |                                      |         |
| T1                                    | 34               | 8.2 (18.8)                | 32          | 3.4 (9.7)            | 5 (-3.0 to 12.0)                     | 0.2     |
| T2                                    | 33               | 31.5 (37.9)               | 31          | 18.5 (23.8)          | 13 (-3.0 to 29.0)                    | 0.11    |
| T3                                    | 27               | 18.9 (28.2)               | 29          | 9.7 (17.6)           | 9 (-3.0 to 22.0)                     | 0.14    |
| T4                                    | 27               | 19.1 (26.7)               | 28          | 7.1 (20.2)           | 12 (-1.0 to 25.0)                    | 0.07    |
| Peak VAS                              | 33               | 42.1 (35.2)               | 29          | 29.5 (22.3)          | 13 (-3.0 to 28.0)                    | 0.10    |
| 2 <sup>nd</sup> Dressing Change       |                  |                           |             |                      |                                      |         |
| T1                                    | 25               | 4.4 (11.6)                | 28          | 1.4 (4.5)            | 3 (-2.0 to 8.0)                      | 0.21    |
| T2                                    | 23               | 14.1 (23.2)               | 27          | 9.6 (20.5)           | 5 (-8.0 to 17.0)                     | 0.47    |
| T3                                    | 11               | 7.7 (19.9)                | 15          | 2.7 (4.6)            | 5 (-6.0 to 16.0)                     | 0.35    |
| T4                                    | 11               | 12.3 (21.1)               | 13          | 3.1 (8.5)            | 9 (-4.0 to 22.0)                     | 0.16    |
| Peak VAS                              | 22               | 21.4 (30.3)               | 26          | 13.8 (21.7)          | 8 (-8.0 to 22.0)                     | 0.32    |
| 3 <sup>rd</sup> Dressing Change       |                  |                           |             |                      |                                      |         |
| T1                                    | 7                | 4.3 (11.3)                | 13          | 2.3 (8.3)            | 2 (-7.0 to 11.0)                     | 0.66    |

|                                 |   |             |    |             |                      |      |
|---------------------------------|---|-------------|----|-------------|----------------------|------|
| T2                              | 6 | 11.7 (16.0) | 11 | 8.2 (10.8)  | 3 (-10.0 to 17.0)    | 0.60 |
| T3                              | 6 | 5.0 (7.1)   | 7  | 8.6 (12.1)  | -4 (-25.0 to 18.0)   | 0.71 |
| T4                              | 3 | 0.0 (0.0)   | 6  | 3.3 (8.2)   | -3 (-18.0 to 12.0)   | 0.60 |
| Peak VAS                        | 5 | 20.0 (14.1) | 11 | 11.8 (11.7) | 8 (-6.0 to 23.0)     | 0.24 |
| <b>Child: FPS – R</b>           |   |             |    |             |                      |      |
| 1 <sup>st</sup> Dressing Change |   |             |    |             |                      |      |
| T1                              | 8 | 0.00 (0.00) | 10 | 0.1 (0.3)   | -0.1 (-.3 to .1)     | 0.39 |
| T2                              | 9 | 2.7 (4.4)   | 9  | 2.4 (3.4)   | 0.2 (-3.7 to 4.1)    | 0.91 |
| T3                              | 7 | 2.0 (3.5)   | 8  | 2.3 (3.6)   | -0.2 (-4.2 to 3.7)   | 0.89 |
| T4                              | 7 | 0.3 (0.8)   | 6  | 1.0 (1.7)   | -0.7 (-2.3 to .8)    | 0.33 |
| Peak FPS – R                    | 9 | 2.7 (4.1)   | 7  | 1.7 (2.1)   | 1.0 (-2.7 to 4.6)    | 0.59 |
| 2 <sup>nd</sup> Dressing Change |   |             |    |             |                      |      |
| T1                              | 5 | 0.00 (0.00) | 6  | 1.7 (4.1)   | -1.7 (-5.8 to 2.5)   | 0.39 |
| T2                              | 6 | 0.7 (1.6)   | 5  | 2.0 (4.5)   | -1.3 (-5.7 to 3.1)   | 0.51 |
| T3                              | 3 | 0.00 (0.00) | 3  | 1.3 (2.3)   | -1.3 (-5 to 2.4)     | 0.37 |
| T4                              | 3 | 0.00 (0.00) | 3  | 1.3 (2.3)   | -1.3 (-5 to 2.4)     | 0.37 |
| Peak FPS – R                    | 6 | 1.0 (1.7)   | 8  | 1.3 (3.5)   | -0.2 (-3.7 to 3.2)   | 0.88 |
| 3 <sup>rd</sup> Dressing Change |   |             |    |             |                      |      |
| T1                              | 2 | 0.00 (0.00) | 3  | 3.3 (5.8)   | -3.3 (-17 to 10.4)   | 0.50 |
| T2                              | 2 | 1.0 (1.4)   | 3  | 3.3 (5.8)   | -2.3 (-16.2 to 11.6) | 0.63 |
| T3                              | 2 | 1.0 (1.4)   | 2  | 0.0 (0.0)   | 1.0 (-3.3 to 5.3)    | 0.42 |
| T4                              | 2 | 2.0 (2.8)   | 0  | -           | -                    | -    |
| Peak FPS – R                    | 2 | 3.0 (1.4)   | 3  | 3.3 (5.8)   | -0.3 (-14.2 to 13.6) | 0.94 |
| <b>Child: VAS</b>               |   |             |    |             |                      |      |
| 1 <sup>st</sup> Dressing Change |   |             |    |             |                      |      |
| T1                              | 8 | 21.9 (27.5) | 7  | 7.1 (15.0)  | 15 (-11 to 40)       | 0.23 |
| T2                              | 7 | 45.7 (41.6) | 5  | 8.0 (11.0)  | 38 (-5 to 81)        | 0.08 |
| T3                              | 6 | 33.3 (37.8) | 4  | 30.0 (47.6) | 3 (-59 to 65)        | 0.90 |
| T4                              | 5 | 28.0 (25.9) | 4  | 25.0 (50.0) | 3 (-57 to 63)        | 0.91 |
| Peak VAS                        | 8 | 52.5 (41.)  | 6  | 23.3 (40.8) | 29 (-19 to 77)       | 0.21 |
| 2 <sup>nd</sup> Dressing Change |   |             |    |             |                      |      |
| T1                              | 8 | 16.3 (22.0) | 5  | 4.0 (8.9)   | 12 (-11 to 35)       | 0.27 |
| T2                              | 7 | 27.9 (27.4) | 5  | 4.0 (8.9)   | 24 (-5 to 52)        | 0.09 |
| T3                              | 5 | 16.0 (26.1) | 3  | 6.7 (11.5)  | 9 (-31 to 49)        | 0.59 |
| T4                              | 5 | 12.0 (17.9) | 3  | 0.0 (0.0)   | 12 (-14 to 38)       | 0.30 |
| Peak VAS                        | 8 | 34.4 (31.3) | 7  | 5.7 (9.8)   | 29 (2 to 55)         | 0.04 |
| 3 <sup>rd</sup> Dressing Change |   |             |    |             |                      |      |
| T1                              | 3 | 8.3 (14.4)  | 2  | 0.0 (0.0)   | 8 (-26 – 43)         | 0.50 |

---

|          |   |             |   |            |                 |        |
|----------|---|-------------|---|------------|-----------------|--------|
| T2       | 3 | 26.7 (25.2) | 2 | 15.0 (7.1) | 12 (-49 to 73)  | 0.58   |
| T3       | 2 | 5.0 (7.1)   | 2 | 5.0 (7.1)  | 0 (-30 to 30)   | > 0.99 |
| T4       | 2 | 20.0 (28.3) | 2 | 0.0 (0.0)  | 20 (-66 to 106) | 0.42   |
| Peak VAS | 2 | 40.0 (14.1) | 2 | 15.0 (7.1) | 25 (-23 to 73)  | 0.15   |

---

\* Adjusted Mean Difference = Intervention Group – Control Group. FLACC = face, legs, activity, cry, consolability scale;

VAS = visual analogue scale; FPS-R = faces pain scale revises; SD = standard deviation; CI = confidence interval; T1 =

timepoint 1; T2 = timepoint 2; T3 = timepoint 3; T4 = timepoint 4.
