# Supplementary material for: Effectiveness of a hydrogel dressing as an analgesic adjunct to first aid for the treatment of acute paediatric burn injuries: a prospective randomised controlled trial
Source: PubMed Central journal article supplement — BMJ Open. 2021 Jan 5;11(1):e039981. doi: 10.1136/bmjopen-2020-039981 (PMC7786810; doi:10.1136/bmjopen-2020-039981), 2021-01-05
Supplement: bmjopen-2020-039981supp004.pdf [file bmjopen-2020-039981supp004.pdf]

**Appendix D.** Staff and caregiver perspectives on dressings

| Assessor        | Dressing Measure             | Control (PVC film) |             | Intervention (HBD) |             | <i>p</i> value |
|-----------------|------------------------------|--------------------|-------------|--------------------|-------------|----------------|
|                 |                              | N                  | Mean (SD)   | N                  | Mean (SD)   |                |
| <b>ED Staff</b> |                              |                    |             |                    |             |                |
|                 | Ease of dressing application | 8                  | 8.00 (1.85) | 15                 | 9.53 (0.99) | 0.056          |
|                 | Ease of dressing removal     | 9                  | 9.78 (0.67) | 16                 | 9.88 (0.50) | 0.709          |
|                 | Flexibility                  | 9                  | 8.22 (1.99) | 16                 | 9.56 (0.73) | 0.082          |
|                 | Conformity                   | 9                  | 7.89 (2.09) | 16                 | 8.44 (1.50) | 0.500          |
| <b>Parents</b>  |                              |                    |             |                    |             |                |
|                 | Ease of dressing application | 16                 | 7.63 (2.66) | 24                 | 9.54 (0.88) | 0.013          |
|                 | Ease of dressing removal     | 16                 | 8.62 (2.28) | 24                 | 9.88 (0.34) | 0.045          |
|                 | Comfort                      | 16                 | 8.19 (2.61) | 24                 | 8.96 (1.88) | 0.318          |
|                 | Ease of movement             | 16                 | 7.81 (2.59) | 24                 | 9.29 (1.30) | 0.047          |

ED = emergency department; PVC = polyvinylchloride film; HBD = hydrogel burn dressing; N = number of participants; SD = standard deviation
