# Supplementary material for: Effectiveness of a hydrogel dressing as an analgesic adjunct to first aid for the treatment of acute paediatric burn injuries: a prospective randomised controlled trial
Source: PubMed Central journal article supplement — BMJ Open. 2021 Jan 5;11(1):e039981. doi: 10.1136/bmjopen-2020-039981 (PMC7786810; doi:10.1136/bmjopen-2020-039981), 2021-01-05
Supplement: bmjopen-2020-039981supp005.pdf [file bmjopen-2020-039981supp005.pdf]

## Appendix E. Pain score frequencies during acute care in the ED

| Pain Scale and Timepoint    | Pain Score | N (Intervention) | Burnaid® N (%) | N (Control)   | Plastic Wrap N (%) |
|-----------------------------|------------|------------------|----------------|---------------|--------------------|
| <b>FLACC (0 – 10 scale)</b> |            | <i>n</i> = 35    |                | <i>n</i> = 23 |                    |
| T1                          | 0          |                  | 18 (51%)       |               | 16 (70%)           |
|                             | 1          |                  | 9 (26%)        |               | 3 (13%)            |
|                             | 2          |                  | 4 (11%)        |               | 2 (9%)             |
|                             | 3          |                  | 1 (3%)         |               | 1 (4%)             |
|                             | 5          |                  | 1 (3%)         |               | 0 (0%)             |
|                             | 6          |                  | 1 (3%)         |               | 1 (4%)             |
|                             | 10         |                  | 1 (3%)         |               | 0 (0%)             |
| T2                          |            | <i>n</i> = 36    |                | <i>n</i> = 35 |                    |
|                             | 0          |                  | 30 (83%)       |               | 26 (74%)           |
|                             | 1          |                  | 1 (3%)         |               | 5 (14%)            |
|                             | 2          |                  | 3 (8%)         |               | 4 (11%)            |
|                             | 3          |                  | 1 (3%)         |               | 0 (0%)             |
| T3                          |            | <i>n</i> = 36    |                | <i>n</i> = 34 |                    |
|                             | 0          |                  | 31 (86%)       |               | 24 (71%)           |
|                             | 1          |                  | 1 (3%)         |               | 5 (15%)            |
|                             | 2          |                  | 2 (6%)         |               | 4 (12%)            |
|                             | 3          |                  | 1 (3%)         |               | 0 (0%)             |
|                             | 6          |                  | 1 (3%)         |               | 0 (0%)             |
| T4                          |            | <i>n</i> = 35    |                | <i>n</i> = 33 |                    |
|                             | 0          |                  | 26 (74%)       |               | 24 (73%)           |
|                             | 1          |                  | 2 (6%)         |               | 2 (6%)             |
|                             | 2          |                  | 3 (9%)         |               | 4 (12%)            |
|                             | 3          |                  | 1 (3%)         |               | 1 (3%)             |
|                             | 4          |                  | 2 (6%)         |               | 1 (3%)             |
|                             | 7          |                  | 0 (0%)         |               | 1 (3%)             |
|                             | 8          |                  | 1 (3%)         |               | 0 (0%)             |
| Peak FLACC                  |            | <i>n</i> = 36    |                | <i>n</i> = 34 |                    |
|                             | 0          |                  | 5 (14%)        |               | 4 (12%)            |
|                             | 1          |                  | 3 (8%)         |               | 4 (12%)            |
|                             | 2          |                  | 7 (19%)        |               | 3 (9%)             |
|                             | 3          |                  | 6 (17%)        |               | 4 (12%)            |

|                                     |     |               |               |
|-------------------------------------|-----|---------------|---------------|
|                                     | 4   | 5 (14%)       | 7 (21%)       |
|                                     | 5   | 2 (6%)        | 2 (6%)        |
|                                     | 6   | 3 (8%)        | 4 (12%)       |
|                                     | 7   | 2 (6%)        | 1 (3%)        |
|                                     | 8   | 3 (8%)        | 3 (9%)        |
|                                     | 9   | 0 (0%)        | 1 (3%)        |
|                                     | 10  | 0 (0%)        | 1 (3%)        |
| <b>Observer VAS (0 – 100 scale)</b> |     | <i>n</i> = 34 | <i>n</i> = 22 |
| <b>T1</b>                           | 0   | 9 (26%)       | 4 (18%)       |
|                                     | 10  | 3 (9%)        | 3 (14%)       |
|                                     | 20  | 4 (12%)       | 1 (5%)        |
|                                     | 30  | 4 (12%)       | 3 (14%)       |
|                                     | 40  | 4 (12%)       | 6 (27%)       |
|                                     | 50  | 0 (0%)        | 4 (18%)       |
|                                     | 55  | 1 (3%)        | 0 (0%)        |
|                                     | 60  | 4 (12%)       | 0 (0%)        |
|                                     | 70  | 3 (9%)        | 0 (0%)        |
|                                     | 80  | 1 (3%)        | 1 (5%)        |
|                                     | 100 | 1 (3%)        | 0 (0%)        |
| <b>T2</b>                           |     | <i>n</i> = 34 | <i>n</i> = 31 |
|                                     | 0   | 14 (41%)      | 10 (32%)      |
|                                     | 10  | 1 (3%)        | 3 (10%)       |
|                                     | 20  | 6 (18%)       | 5 (16%)       |
|                                     | 25  | 0 (0%)        | 1 (3%)        |
|                                     | 30  | 4 (12%)       | 5 (16%)       |
|                                     | 35  | 0 (0%)        | 1 (3%)        |
|                                     | 40  | 2 (6%)        | 2 (6%)        |
|                                     | 50  | 1 (3%)        | 2 (6%)        |
|                                     | 60  | 4 (12%)       | 2 (6%)        |
|                                     | 70  | 2 (6%)        | 0 (0%)        |
| <b>T3</b>                           |     | <i>n</i> = 35 | <i>n</i> = 34 |
|                                     | 0   | 15 (43%)      | 14 (41%)      |
|                                     | 10  | 2 (6%)        | 7 (21%)       |
|                                     | 20  | 7 (20%)       | 4 (12%)       |
|                                     | 30  | 5 (14%)       | 3 (9%)        |
|                                     | 40  | 1 (3%)        | 1 (3%)        |
|                                     | 50  | 2 (6%)        | 2 (6%)        |
|                                     | 60  | 3 (9%)        | 1 (3%)        |

|                               |     |               |          |               |
|-------------------------------|-----|---------------|----------|---------------|
|                               | 80  |               | 0 (0%)   | 1 (3%)        |
|                               | 100 |               | 0 (0%)   | 1 (3%)        |
| T4                            |     | <i>n</i> = 33 |          | <i>n</i> = 32 |
|                               | 0   |               | 12 (36%) | 16 (50%)      |
|                               | 10  |               | 2 (6%)   | 4 (13%)       |
|                               | 20  |               | 6 (18%)  | 5 (16%)       |
|                               | 30  |               | 4 (12%)  | 0 (0%)        |
|                               | 40  |               | 1 (3%)   | 1 (3%)        |
|                               | 50  |               | 3 (9%)   | 2 (6%)        |
|                               | 60  |               | 4 (12%)  | 2 (6%)        |
|                               | 70  |               | 0 (0%)   | 1 (3%)        |
|                               | 100 |               | 1 (3%)   | 1 (3%)        |
| <b>FPS – R (0 – 10 scale)</b> |     | <i>n</i> = 9  |          | <i>n</i> = 7  |
| T1                            | 0   |               | 4 (44%)  | 1 (14%)       |
|                               | 2   |               | 0 (0%)   | 2 (29%)       |
|                               | 4   |               | 3 (33%)  | 2 (29%)       |
|                               | 5   |               | 0 (0%)   | 1 (14%)       |
|                               | 8   |               | 1 (11%)  | 1 (14%)       |
|                               | 10  |               | 1 (11%)  | 0 (0%)        |
| T2                            |     | <i>n</i> = 10 |          | <i>n</i> = 9  |
|                               | 0   |               | 6 (60%)  | 4 (44%)       |
|                               | 2   |               | 1 (10%)  | 2 (22%)       |
|                               | 4   |               | 0 (0%)   | 1 (11%)       |
|                               | 6   |               | 1 (10%)  | 1 (11%)       |
|                               | 8   |               | 0 (0%)   | 1 (11%)       |
|                               | 10  |               | 2 (20%)  | 0 (0%)        |
| T3                            |     | <i>n</i> = 11 |          | <i>n</i> = 11 |
|                               | 0   |               | 8 (73%)  | 9 (82%)       |
|                               | 1   |               | 1 (9%)   | 0 (0%)        |
|                               | 4   |               | 0 (0%)   | 1 (9%)        |
|                               | 6   |               | 1 (9%)   | 0 (0%)        |
|                               | 10  |               | 1 (9%)   | 1 (9%)        |
| T4                            |     | <i>n</i> = 10 |          | <i>n</i> = 10 |
|                               | 0   |               | 4 (40%)  | 5 (50%)       |
|                               | 1   |               | 1 (10%)  | 0 (0%)        |
|                               | 2   |               | 1 (10%)  | 2 (20%)       |
|                               | 4   |               | 1 (10%)  | 0 (0%)        |

|                                              |               |         |              |
|----------------------------------------------|---------------|---------|--------------|
|                                              | 6             | 2 (20%) | 1 (10%)      |
|                                              | 10            | 1 (10%) | 2 (20%)      |
| <b>Child Self-report VAS (0 – 100 scale)</b> | <i>n</i> = 9  |         | <i>n</i> = 2 |
| T1                                           | 0             | 2 (22%) | 0 (0%)       |
|                                              | 10            | 0 (0%)  | 1 (50%)      |
|                                              | 20            | 1 (11%) | 0 (0%)       |
|                                              | 30            | 1 (11%) | 1 (50%)      |
|                                              | 40            | 1 (11%) | 0 (0%)       |
|                                              | 50            | 2 (22%) | 0 (0%)       |
|                                              | 70            | 1 (11%) | 0 (0%)       |
|                                              | 85            | 1 (11%) | 0 (0%)       |
| T2                                           | <i>n</i> = 10 |         | <i>n</i> = 4 |
|                                              | 0             | 4 (40%) | 1 (25%)      |
|                                              | 10            | 0 (0%)  | 1 (25%)      |
|                                              | 20            | 3 (30%) | 1 (25%)      |
|                                              | 30            | 1 (10%) | 0 (0%)       |
|                                              | 50            | 1 (10%) | 0 (0%)       |
|                                              | 60            | 1 (10%) | 0 (0%)       |
|                                              | 80            | 0 (0%)  | 1 (25%)      |
| T3                                           | <i>n</i> = 11 |         | <i>n</i> = 5 |
|                                              | 0             | 5 (45%) | 4 (80%)      |
|                                              | 10            | 1 (9%)  | 0 (0%)       |
|                                              | 20            | 3 (27%) | 0 (0%)       |
|                                              | 40            | 0 (0%)  | 1 (20%)      |
|                                              | 50            | 1 (9%)  | 0 (0%)       |
|                                              | 60            | 1 (9%)  | 0 (0%)       |
| T4                                           | <i>n</i> = 7  |         | <i>n</i> = 4 |
|                                              | 0             | 2 (29%) | 2 (50%)      |
|                                              | 10            | 0 (0%)  | 1 (25%)      |
|                                              | 20            | 1 (14%) | 0 (0%)       |
|                                              | 40            | 2 (29%) | 0 (0%)       |
|                                              | 55            | 1 (14%) | 0 (0%)       |
|                                              | 60            | 1 (14%) | 0 (0%)       |
|                                              | 90            | 0 (0%)  | 1 (25%)      |

N = number of participants; FLACC = face, legs, activity, cry, consolability scale; VAS = visual analogue scale; FPS-R = faces pain scale revises; Ag = silver dressing; T1 = timepoint 1; T2 = timepoint 2; T3 = timepoint 3; T4 = timepoint 4.
